# Supplementary material for: Network based meta-analysis prediction of microenvironmental relays involved in stemness of human embryonic stem cells
Source: PeerJ. 2014 Oct 23;2:e618. doi: 10.7717/peerj.618 (PMC4217173; doi:10.7717/peerj.618)
Supplement: Table S3 — GO Biological Processes term and KEGG pathway enrichments analysis of (A) EC+TF interactomes, (B) full lists of candidates and (C–I) subsets of candidates (EC, extracellular part; TF, transcription factor related part). [file peerj-02-618-s004.xlsx]

## Sheet: Legend
	Terms/Pathways	Transcrition factor related
		Extracellular related
		Development/Differentiation
		Canonical pathway
		Other
	Statistics: False discovery rate (FDR)	FDR > 0.05
		0.01 ≤ FDR ≤ 0.05
		FDR ≤ 0.01
	Column	Meaning
	%	% of proteins matching the term in the analysed list
	% (human)	count (human) / pop hits (human)
	% (hESC)	count (hESC) / pop hits (hESC)
	Fold Enrichment (human)	[(Count/List Total)*(pop Total/Pop Hits)] (with the human as background)
	Fold Enrichment (hESC)	[(Count/List Total)*(pop Total/Pop Hits)] (with the hESC as background)
	FDR (human)	False Discovery Rate (with the human as background)
	FDR (hESC)	False Discovery Rate (with the hESC as background)
	Count	Number of proteins matching the term in the analysed list
	List Total	Total number of proteins in the analysed list
	Pop Hits	Number of proteins matching the term in the background list
	Pop Total	Total number of proteins in the background list

## Sheet: A) EC+TF interactome
Term		%		% (human)	% (human)	% (hESC)	% (hESC)	Fold Enrichment (human)	Fold Enrichment (human)	Fold Enrichment (hESC)	Fold Enrichment (hESC)	FDR (human)	FDR (human)	FDR (hESC)	FDR (hESC)	Count	Count (human)	List Total	List Total (human)	Pop Hits (human)	Pop Hits (hESC)	Pop Total (human)	Pop Total (hESC)
		ALL	C+S	ALL	C+S	ALL	C+S	ALL	C+S	ALL	C+S	ALL	C+S	ALL	C+S	ALL	C+S	ALL	C+S
GO	GO:0006350~transcription	44.7783	35.7143	14.8977	4.52166	29.7812	9.03901	3.09714	2.47394	2.69785	2.155	2.3024e-85	5.07945e-15	2.19597e-76	2.48024e-11	313	95	679	258	2101	1051	14116	6151
	GO:0010467~gene expression	47.9256	38.3459	11.1704	3.40113	21.4194	6.52174	2.32226	1.86087	1.94037	1.55485	8.3817e-59	4.43087e-08	6.09138e-43	0.00073749	335	102	679	258	2999	1564		6151
	GO:0010468~regulation of gene expression	56.3662	48.1203	13.7955	4.48179	27.9433	9.07801	2.868	2.45213	2.53136	2.1643	5.18689e-106	7.40864e-23	1.66168e-95	2.50888e-18	394	128	679	258	2856	1410		6151
	GO:0010628~positive regulation of gene expression	23.319	19.1729	28.0551	8.77797	58.4229	18.2796	5.83248	4.80271	5.29248	4.35805	8.07906e-79	2.40295e-17	2.51554e-84	2.73599e-16	163	51	679	258	581	279		6151
	GO:0010629~negative regulation of gene expression	18.3119	19.5489	25.3968	10.3175	46.3768	18.8406	5.27985	5.64501	4.20123	4.4918	1.23341e-54	6.25789e-21	6.69128e-49	2.71973e-17	128	52	679	258	504	276		6151
	GO:0016481~negative regulation of transcription	17.4535	18.4211	26.5795	10.6754	50	20.082	5.52572	5.84084	4.52946	4.78776	3.73255e-54	3.95274e-20	7.38874e-51	2.73217e-17	122	49	679	258	459	244		6151
	GO:0045449~regulation of transcription	53.7911	46.2406	14.456	4.72895	29.8176	9.75416	3.00531	2.58736	2.70115	2.3255	1.11503e-105	1.088e-23	4.1873e-99	4.70861e-20	376	123	679	258	2601	1261		6151
	GO:0045941~positive regulation of transcription	23.0329	18.4211	28.5461	8.68794	58.7591	17.8832	5.93456	4.75345	5.32294	4.26355	5.59313e-79	2.49691e-16	1.06698e-83	4.30999e-15	161	49	679	258	564	274		6151
	GO:0003001~generation of a signal involved in cell-cell signaling	1.71674				44.4444				4.02618				0.123231		12		679	258		27		6151
	GO:0007044~cell-substrate junction assembly	1.12782	0.858369	13.0435	26.087			7.1365	5.42332			69.9195	7.34836			3	6	679	258	23			6151
	GO:0007154~cell communication	12.3033	13.1579	10.8176	4.40252	29.7578	12.1107	2.24892	2.40876	2.69573	2.88733	3.26651e-09	0.00537853	1.56083e-15	4.77097e-05	86	35	679	258	795	289		6151
	GO:0007155~cell adhesion	10.5866	16.1654	10.5714	6.14286	24.5033	14.2384	2.19774	3.36095	2.21973	3.39459	4.43631e-07	1.21364e-08	4.06791e-08	3.53273e-09	74	43	679	258	700	302		6151
	GO:0007267~cell-cell signaling	9.299	10.9023	10.8333	4.83333	32.0197	14.2857	2.25218	2.64447	2.90064	3.40587	2.5195e-06	0.00857546	1.43219e-12	2.87799e-05	65	29	679	258	600	203		6151
	GO:0010646~regulation of cell communication	17.3104	18.797	11.657	4.81696	23.1801	9.57854	2.42343	2.63551	2.09986	2.28363	4.18599e-17	8.95567e-07	1.9984e-13	6.04724e-05	121	50	679	258	1038	522		6151
	GO:0010647~positive regulation of cell communication	8.44063	9.02256	17.9331	7.29483	36.4198	14.8148	3.72819	3.99123	3.29923	3.53201	5.00217e-15	6.32458e-05	3.64432e-14	0.000349396	59	24	679	258	329	162		6151
	GO:0010648~negative regulation of cell communication	5.15021	6.01504	14.5161	6.45161	28.125	12.5	3.01782	3.52988	2.54782	2.98014	1.71125e-05	0.0893213	0.000350463	0.465184	36	16	679	258	248	128		6151
	GO:0016337~cell-cell adhesion		3.7594				9.17431				2.18726				49.8532		10	679	258		109		6151
	GO:0022407~regulation of cell-cell adhesion	1.14449	2.63158	36.3636	31.8182	53.3333	46.6667	7.55978	17.4087	4.83142	11.1258	0.0957033	0.00358591	1.02473	0.0326537	8	7	679	258	22	15		6151
	GO:0022409~positive regulation of cell-cell adhesion	0.715308	1.50376			71.4286	57.1429			6.47065	13.6235			6.9667	3.90475	5	4	679	258		7		6151
	GO:0022610~biological adhesion	10.5866	16.1654	10.5563	6.13409	24.5033	14.2384	2.1946	3.35616	2.21973	3.39459	4.71572e-07	1.27141e-08	4.06791e-08	3.53273e-09	74	43	679	258	701	302		6151
	GO:0030155~regulation of cell adhesion	4.43491	7.5188	22.6277	14.5985	48.4375	31.25	4.70417	7.98733	4.38791	7.45034	3.25932e-09	1.047e-08	7.8777e-10	9.37934e-09	31	20	679	258	137	64		6151
	GO:0030198~extracellular matrix organization	4.29185	6.39098	28.8462	16.3462	55.5556	31.4815	5.99694	8.9435	5.03273	7.50553	9.23706e-12	1.03804e-07	2.05391e-11	4.91676e-07	30	17	679	258	104	54		6151
	GO:0034330~cell junction organization	1.43062	2.63158	17.5439	12.2807		21.2121	3.64726	6.71916		5.0572	2.67629	1.01877		3.76561	10	7	679	258	57	33		6151
	GO:0043062~extracellular structure organization	5.15021	6.76692	22.0859	11.0429	43.9024	21.9512	4.59152	6.04195	3.97708	5.23341	8.37885e-11	1.25157e-05	2.8012e-10	5.36379e-05	36	18	679	258	163	82		6151
	GO:0045216~cell-cell junction organization		1.50376				21.0526				5.01918				54.041		4	679	258		19		6151
	GO:0000904~cell morphogenesis involved in differentiation	5.29328	6.01504	15.1639	6.55738	32.7434	14.1593	3.15249	3.58775	2.96619	3.37573	3.10173e-06	0.074113	2.67396e-06	0.112001	37	16	679	258	244	113		6151
	GO:0001701~in utero embryonic development	4.29185	4.13534	17.0455	6.25	31.25	11.4583	3.54365	3.41957	2.83091	2.73179	9.60051e-06	2.55479	0.000397702	10.95	30	11	679	258	176	96		6151
	GO:0001704~formation of primary germ layer	1.8598	2.25564	32.5	15	54.1667	25	6.75655	8.20698	4.90691	5.96027	0.00040899	1.33531	0.00417366	4.7294	13	6	679	258	40	24		6151
	GO:0001707~mesoderm formation	1.71674	2.25564	33.3333	16.6667	52.1739	26.087	6.9298	9.11886	4.72639	6.21941	0.00106968	0.813713	0.0193697	3.89019	12	6	679	258	36	23		6151
	GO:0001708~cell fate specification	1.57368	1.50376			68.75	25			6.228	5.96027			0.00198118	38.6416	11	4	679	258		16		6151
	GO:0001709~cell fate determination	1.00143	1.50376	21.5686	7.84314	53.8462	30.7692	4.48399	4.29123	4.87787	7.33572	0.241345	70.2594	2.77805	23.8074	11	4	679	258	51	13		6151
	GO:0001756~somitogenesis	1.43062		29.4118		58.8235		6.11453		5.32877		0.0423838		0.045247		10		679	258	34	17		6151
	GO:0001824~blastocyst development	1.71674	1.8797	27.907	11.6279	40	16.6667	5.80169	6.362	3.62356	3.97351	0.00752812	12.7277	0.378017	46.8156	12	5	679	258	43	30		6151
	GO:0001825~blastocyst formation		1.50376				33.3333				7.94703				19.3764		4	679	258		12		6151
	GO:0001829~trophectodermal cell differentiation	0.858369	1.50376			60	40			5.43535	9.53643			4.55119	11.7214	6	4	679	258		10		6151
	GO:0001892~embryonic placenta development	1.57368	1.8797	45.8333		68.75	17.2414	9.52847		6.228	4.11053	0.0001203		0.00198118	43.1132	11	5	679	258	24	16		6151
	GO:0001841~neural tube formation		1.8797				18.5185				4.41502				35.8017		5	679	258		27		6151
	GO:0001892~embryonic placenta development		2.25564		25		37.5		13.6783		8.94041		0.110004		0.652145		6	679	258	24	16		6151
	GO:0007275~multicellular organismal development	46.7811	54.1353	11.4136	5.02618	26.0766	11.4833	2.37282	2.74998	2.36225	2.73773	3.86094e-59	3.43803e-33	4.68896e-64	4.74122e-34	327	144	679	258	2865	1254		6151
	GO:0007368~determination of left/right symmetry	1.28755	1.8797			39.1304	21.7391			3.54479	5.18284			4.10516	22.3783	9	5	679	258		23		6151
	GO:0007369~gastrulation	2.71817	2.63158	27.1429	10	45.2381	16.6667	5.64284	5.47132	4.09808	3.97351	6.06935e-06	2.99604	0.000234737	12.4717	19	7	679	258	70	42		6151
	GO:0007398~ectoderm development	4.14878	5.26316	14.5729	7.03518	50	24.1379	3.02961	3.84917	4.52946	5.75474	0.000561298	0.130353	1.93452e-09	0.000915064	29	14	679	258	199	58		6151
	GO:0007498~mesoderm development	2.43205	3.00752	22.973	10.8108	43.5897	20.5128	4.77594	5.91494	3.94876	4.89048	0.000617481	0.692871	0.00242564	1.77032	17	8	679	258	74	39		6151
	GO:0009790~embryonic development	13.5908	15.0376	16.7254	7.04225	33.9286	14.2857	3.4771	3.85304	3.07356	3.40587	8.8048e-24	1.2111e-09	3.91548e-22	2.29435e-08	95	40	679	258	568	280		6151
	GO:0009792~embryonic development ending in birth or egg hatching	8.29757	9.77444	17.3653	7.78443	35.5828	15.9509	3.61013	4.25911	3.22342	3.80287	4.60632e-14	3.89783e-06	1.9984e-13	2.03187e-05	58	26	679	258	334	163		6151
	GO:0009952~anterior/posterior pattern formation	3.57654	2.63158	17.8571	5	47.1698	13.2075	3.71239	2.73566	4.27307	3.14882	9.23497e-05	54.3609	4.50305e-07	33.0807	25	7	679	258	140	53		6151
	GO:0009953~dorsal/ventral pattern formation	1.28755				42.8571				3.88239				2.10132		9		679	258		21		6151
	GO:0010769~regulation of cell morphogenesis involved in differentiation	2.86123	4.13534	25.974	14.2857	40.8163	22.449	5.39984	7.81617	3.69751	5.35208	4.72116e-06	0.00225515	0.000704314	0.0472304	20	11	679	258	77	49		6151
	GO:0010770~positive regulation of cell morphogenesis involved in differentiation	0.858369	1.12782	85.7143	42.8571	100	50	17.8195	23.4485	9.05891	11.9205	0.00902786	11.0435	0.161838	34.4192	6	3	679	258	7	6		6151
	GO:0019827~stem cell maintenance	1.28755	1.8797	36	20	56.25	31.25	7.48418	10.9426	5.09564	7.45034	0.0262425	1.77982	0.221721	6.30765	9	5	679	258	25	16		6151
	GO:0021915~neural tube development	1.8598	2.25564			36.1111	16.6667			3.27127	3.97351			0.550874	25.0187	13	6	679	258		36		6151
	GO:0030154~cell differentiation	30.329	34.9624	12.9505	5.68112	29.5676	12.9707	2.69233	3.10832	2.67851	3.09236	1.36792e-41	1.8453e-21	1.53388e-45	4.18949e-22	212	93	679	258	1637	717		6151
	GO:0030326~embryonic limb morphogenesis	2.43205	2.25564	19.5402	6.89655	40.4762	14.2857	4.0623	3.77332	3.6667	3.40587	0.00607113	31.8527	0.00778598	41.4238	17	6	679	258	87	42		6151
	GO:0035113~embryonic appendage morphogenesis	2.43205	2.25564	19.5402	6.89655	40.4762	14.2857	4.0623	3.77332	3.6667	3.40587	0.00607113	31.8527	0.00778598	41.4238	17	6	679	258	87	42		6151
	GO:0045165~cell fate commitment	5.00715	6.39098	25.1799	12.2302	64.8148	31.4815	5.23474	6.69154	5.87152	7.50553	3.07532e-12	8.38765e-06	8.28337e-17	4.91676e-07	35	17	679	258	139	54		6151
	GO:0045168~cell-cell signaling involved in cell fate specification	0.715308				71.4286				6.47065				6.9667		5		679	258		7		6151
	GO:0045595~regulation of cell differentiation	17.0243	21.8045	24.187	11.7886	48.9712	23.8683	5.02833	6.44993	4.43626	5.69046	6.44e-48	6.80071e-27	3.26735e-48	2.35496e-25	119	58	679	258	492	243		6151
	GO:0045596~negative regulation of cell differentiation	8.01144	11.2782	25.9259	13.8889	50	26.7857	5.38984	7.59905	4.52946	6.386	4.44805e-22	4.58975e-14	4.1918e-21	1.18794e-12	56	30	679	258	216	112		6151
	GO:0045597~positive regulation of cell differentiation	8.29757	10.9023	25.3275	12.6638	54.717	27.3585	5.26544	6.92874	4.95676	6.52256	2.02336e-22	2.18714e-12	1.2855e-24	1.78746e-12	58	29	679	258	229	106		6151
	GO:0045995~regulation of embryonic development	1.00143	1.50376	53.8462	30.7692	100	57.1429	11.1943	16.8348	9.05891	13.6235	0.0285184	2.62955	0.0206325	3.90475	7	4	679	258	13	7		6151
	GO:0048332~mesoderm morphogenesis	1.71674	2.25564	31.5789	15.7895	52.1739	26.087	6.56507	8.63892	4.72639	6.21941	0.00196195	1.05061	0.0193697	3.89019	12	6	679	258	38	23		6151
	GO:0048562~embryonic organ morphogenesis	2.28898	3.38346			35.5556	20			3.22095	4.76822			0.0987093	0.832259	16	9	679	258		45		6151
	GO:0048568~embryonic organ development	4.14878	6.01504	16.8605	9.30233	43.2836	23.8806	3.50519	5.0896	3.92102	5.69339	2.32309e-05	0.00103656	1.47467e-07	0.000120679	29	16	679	258	172	67		6151
	GO:0048598~embryonic morphogenesis	7.86838	8.27068	17.9153	7.16612	37.6712	15.0685	3.72448	3.92081	3.4126	3.59249	8.4459e-14	0.000368479	9.41203e-14	0.000975188	55	22	679	258	307	146		6151
	GO:0048863~stem cell differentiation	1.28755	1.8797			52.9412	29.4118			4.79589	7.01208			0.37834	7.91709	9	5	679	258		17		6151
	GO:0048864~stem cell development	1.28755	1.8797	34.6154	19.2308	52.9412	29.4118	7.19633	10.5218	4.79589	7.01208	0.0363181	2.07073	0.37834	7.91709	9	5	679	258	26	17		6151
	GO:0051093~negative regulation of developmental process	9.299	13.1579	25.0965	13.5135	49.6183	26.7176	5.21742	7.39367	4.49488	6.36976	2.83974e-25	1.41339e-16	8.57624e-25	2.04543e-15	65	35	679	258	259	131		6151
	GO:0051094~positive regulation of developmental process	9.87124	13.1579	24.8201	12.5899	53.0769	26.9231	5.15996	6.88835	4.80819	6.41875	1.00757e-26	1.35468e-15	7.10465e-29	1.57281e-15	69	35	679	258	278	130		6151
	GO:0008543~fibroblast growth factor receptor signaling pathway	1.28755	1.50376	31.0345	13.7931	69.2308	30.7692	6.45188	7.54665	6.27155	7.33572	0.0877634	24.1775	0.0300613	23.8074	9	4	679	258	29	13		6151
	GO:0008593~regulation of Notch signaling pathway		1.50376				50				11.9205				5.99364		4	679	258		8		6151
	GO:0016055~Wnt receptor signaling pathway	3.29041	1.50376	17.2932	4.51128	31.5068		3.59516	2.46826	2.85418		0.000634285	83.4499	0.0122193		23	6	679	258	133	73		6151
	GO:0017015~regulation of transforming growth factor beta receptor signaling pathway	1.8598	2.25564	33.3333	15.3846	56.5217	26.087	6.9298	8.41741	5.12025	6.21941	0.000299257	1.18664	0.00231749	3.89019	13	6	679	258	39	23		6151
	GO:0030509~BMP signaling pathway	2.43205	3.38346	38.6364	20.4545	54.8387	29.0323	8.03227	11.1913	4.96779	6.92161	1.47456e-07	0.00194476	4.53182e-05	0.0508104	17	9	679	258	44	31		6151
	GO:0030510~regulation of BMP signaling pathway	1.14449	1.50376			50	25			4.52946	5.96027			1.64507	38.6416	8	4	679	258		16		6151
	GO:0030511~positive regulation of transforming growth factor beta receptor signaling pathway	0.858369	1.12782			85.7143	42.8571			7.76478	10.2176			0.514027	43.8435	6	3	679	258		7		6151
	GO:0030514~negative regulation of BMP signaling pathway	1.00143	1.50376			53.8462	30.7692			4.87787	7.33572			2.77805	23.8074	7	4	679	258		13		6151
	GO:0032925~regulation of activin receptor signaling pathway	0.715308	1.12782			71.4286	42.8571			6.47065	10.2176			6.9667	43.8435	5	3	679	258		7		6151
	GO:0006928~cell motion	10.5866	14.6617	15.5789	8.21053	33.945	17.8899	3.23877	4.49224	3.07504	4.26515	5.78494e-16	2.04281e-11	1.68517e-16	3.09419e-11	74	39	679	258	475	218		6151
	GO:0008283~cell proliferation	8.44063	8.64662	13.5321	5.27523	26.4574	10.3139	2.81324	2.88625	2.39675	2.45895	2.48633e-09	0.0287439	2.5517e-07	0.2459	59	23	679	258	436	223		6151
	GO:0008284~positive regulation of cell proliferation	11.588	15.4135	19.5652	9.90338	39.7059	20.098	4.06749	5.41845	3.59692	4.79159	2.18524e-24	4.55607e-15	1.62495e-23	6.89832e-14	81	41	679	258	414	204		6151
	GO:0008285~negative regulation of cell proliferation	9.44206	11.2782	18.2825	8.31025	36.6667	16.6667	3.80083	4.5468	3.3216	3.97351	1.29351e-17	3.34994e-08	2.24581e-16	3.73378e-07	66	30	679	258	361	180		6151
	GO:0042127~regulation of cell proliferation	21.1731	26.6917	18.8056	9.0216	37.4684	17.9747	3.90957	4.936	3.39422	4.28536	2.90627e-46	1.0356e-26	2.98976e-43	5.11158e-24	148	71	679	258	787	395		6151
	GO:0051129~negative regulation of cellular component organization	2.86123	4.51128			23.2558	13.9535			2.10672	3.32666			3.89806	1.46756	20	12	679	258		86		6151
	GO:0051130~positive regulation of cellular component organization	5.00715	4.88722	19.337	7.18232	35.7143	13.2653	4.02005	3.92968	3.23533	3.16259	1.08918e-08	0.214121	5.97025e-07	1.28117	35	13	679	258	181	98		6151
	GO:0051270~regulation of cell motion	7.72532	12.406	27.9793	17.0984	50.9434	31.1321	5.81672	9.3551	4.61492	7.42222	6.62577e-23	1.32598e-18	9.92036e-21	1.55692e-16	54	33	679	258	193	106		6151
	GO:0051271~negative regulation of cell motion	2.00286	3.7594	22.2222	15.873	41.1765	29.4118	4.61987	8.68463	3.73014	7.01208	0.0135293	0.00342653	0.0598822	0.0126202	14	10	679	258	63	34		6151
	GO:0051272~positive regulation of cell motion	4.57797	6.76692	32.6531	18.3673	59.2593	33.3333	6.78837	10.0494	5.36824	7.94703	1.7056e-14	3.4258e-09	1.9984e-13	4.48467e-08	32	18	679	258	98	54		6151
KEGG	hsa03022:Basal transcription factors	2.71817	1.8797	54.2857	14.2857	95	25	7.11451	4.81079	5.48454	3.70861	7.91422e-09	19.1651	2.11232e-09	37.0841	19	5	388	151	35	20	5085	2240
	hsa04060:Cytokine-cytokine receptor interaction	6.58083	8.64662	17.5573	8.77863	67.6471	33.8235	2.301	2.95625	3.9054	5.01753	0.000119025	0.00739119	9.79039e-17	1.05258e-07	46	23	388	151	262	68		2240
	hsa04510:Focal adhesion	7.72532	9.3985	26.8657	12.4378	42.8571	19.8413	3.52093	4.18849	2.47423	2.94334	1.33227e-13	3.05433e-06	1.46902e-08	0.00141786	54	25	388	151	201	126		2240
	hsa04512:ECM-receptor interaction	5.15021	7.89474	42.8571	25	80	46.6667	5.61672	8.41887	4.61856	6.92274	2.84432e-15	1.69142e-10	3.55158e-16	8.04445e-10	36	21	388	151	84	45		2240
	hsa04520:Adherens junction	3.29041	3.38346	29.8701	11.6883	40.3509	15.7895	3.91468	3.9361	2.32954	2.34228	3.24422e-05	1.99173	0.102107	31.8261	23	9	388	151	77	57		2240
	hsa04320:Dorso-ventral axis formation		1.8797				35.7143				5.29801				12.1043		5	388	151		14		2240
	hsa04010:MAPK signaling pathway	6.00858	6.01504	15.7303	5.99251	28.3784		2.06157	2.01801	1.63834		0.00911782	12.3223	0.829546		42	16	388	151	267	148		2240
	hsa04310:Wnt signaling pathway	4.86409	3.38346	22.5166	5.96026	36.5591		2.95095	2.00715	2.11063		1.89981e-05	59.3045	0.0143101		34	9	388	151	151	93		2240
	hsa04330:Notch signaling pathway	1.8598		27.6596		59.0909		3.62497		3.41143		0.166767		0.0855922		13		388	151	47	22		2240
	hsa04350:TGF-beta signaling pathway	5.43634	7.89474	43.6782	24.1379	62.2951	34.4262	5.72432	8.12857	3.59642	5.10694	1.24807e-16	3.47278e-10	1.68865e-11	6.26409e-07	38	21	388	151	87	61		2240
	hsa04110:Cell cycle	3.57654	3.38346	20	7.2			2.62113	2.42464			0.0198597	29.5091			25	9	388	151	125			2240
	hsa05200:Pathways in cancer	13.4478	13.9098	28.6585	11.2805	47.9592	18.8776	3.75589	3.79876	2.76878	2.80038	2.77664e-29	1.87916e-09	4.34495e-22	4.6818e-06	94	37	388	151	328	196		2240

## Sheet: B) Full lists of candidates
Term		%				% (hESC)	% (hESC)	% (hESC)	% (hESC)	% (human)	% (human)	% (human)	% (human)	Fold Enrichment (hESC)	Fold Enrichment (hESC)	Fold Enrichment (hESC)	Fold Enrichment (hESC)	Fold Enrichment (human)	Fold Enrichment (human)	Fold Enrichment (human)	Fold Enrichment (human)	FDR (hESC)	FDR (hESC)	FDR (hESC)	FDR (hESC)	FDR (human)	FDR (human)	FDR (human)	FDR (human)	Count				List Total	List Total (human)	List Total (human)	List Total (human)	Pop Hits (hESC)	Pop Hits (human)	Pop Total (hESC)	Pop Total (human)
		ALL_EC+TF	ALL_EC	C+S_EC+TF	C+S_EC	ALL_EC+TF	ALL_EC	C+S_EC+TF	C+S_EC	ALL_EC+TF	ALL_EC	C+S_EC+TF	C+S_EC	ALL_EC+TF	ALL_EC	C+S_EC+TF	C+S_EC	ALL_EC+TF	ALL_EC	C+S_EC+TF	C+S_EC	ALL_EC+TF	ALL_EC	C+S_EC+TF	C+S_EC	ALL_EC+TF	ALL_EC	C+S_EC+TF	C+S_EC	ALL_EC+TF	ALL_EC	C+S_EC+TF	C+S_EC	ALL_EC+TF	ALL_EC	C+S_EC+TF	C+S_EC
GO	GO:0006350~transcription	43.1169		32.9032		15.7945		4.85252		7.901		2.42742		2.57697		1.98986		2.95837		2.28436		2.08404e-33		0.00102639		1.20259e-39		1.44892e-05		166		51		377	180	150	88	1051	2101	6151	14116
	GO:0010467~gene expression	46.7532		35.4839		11.509		3.51662		6.002		1.83394		1.87776		1.44205		2.24733		1.72586		8.82726e-19		3.43285		1.25022e-27		0.0304096		180		55		377	180	150	88	1564	2999
	GO:0010468~regulation of gene expression	57.1429		50.3226		15.6028		5.53191		7.70308		2.73109		2.5457		2.26845		2.88426		2.57014		1.46947e-49		1.73084e-11		2.72827e-57		1.46273e-14		220		78		377	180	150	88	1410	2856
	GO:0010628~positive regulation of gene expression	25.1948		20.6452	8.69565	34.767		11.4695	2.86738	16.6954		5.50775	1.37694	5.67247		4.70327	2.00424	6.25124		5.18316	2.20873	1.44141e-46		6.45339e-10	83.2022	7.8238e-47		9.29701e-11	69.5341	97		32	8	377	180	150	88	279	581
	GO:0010629~negative regulation of gene expression	16.3636		18.0645	9.78261	22.8261		10.1449	3.26087	12.5		5.55556	1.78571	3.72422		4.1601	2.27927	4.68037		5.22815	2.86445	2.68532e-17		5.2191e-07	50.8369	2.13108e-21		4.55197e-09	19.253	63		28	9	377	180	150	88	276	504
	GO:0016481~negative regulation of transcription	15.8442		17.4194	9.78261	25		11.0656	3.68852	13.2898		5.88235	1.96078	4.07891		4.53762	2.57819	4.97608		5.53569	3.14528	8.99481e-19		1.74638e-07	31.0687	5.24948e-22		3.45638e-09	11.7878	61		27	9	377	180	150	88	244	459
	GO:0045449~regulation of transcription	54.2857		47.7419		16.5741		5.86836		8.03537		2.84506		2.70418		2.40642		3.00868		2.67739		1.62429e-50		6.41709e-12		2.82237e-56		2.20083e-14		209		74		377	180	150	88	1261	2601
	GO:0045941~positive regulation of transcription	24.9351		20		35.0365		11.3139		17.0213		5.49645		5.71643		4.63944		6.37327		5.17253		2.34127e-46		2.43664e-09		4.77575e-47		2.75013e-10		96		31		377	180	150	88	274	564
	GO:0001952~regulation of cell-matrix adhesion	1.03896	1.60428	1.93548		28.5714	21.4286	21.4286				11.1111		4.66161	7.32262	8.78714				10.4563		60.5628	67.3668	54.4014				44.1403		4	3	3		377	180	150	88	14	27
	GO:0003001~generation of a signal involved in cell-cell signaling	2.07792	3.20856			29.6296	22.2222							4.83427	7.59383							1.66142	1.67256							8	6			377	180	150	88	27
	GO:0007044~cell-substrate junction assembly	1.2987	2.6738			33.3333	33.3333			21.7391	21.7391			5.43855	11.3907			8.13978	17.0483			18.1391	1.30317			5.21035	0.326106			5	5			377	180	150	88	15	23
	GO:0007154~cell communication	14.2857	21.9251	17.4194	25	19.0311	14.1869	9.34256	7.95848	6.91824	5.15723	3.39623	2.89308	3.10505	4.84796	3.83107	5.56279	2.59039	4.04442	3.19608	4.64077	6.08069e-11	3.68907e-14	7.18195e-06	6.76241e-08	3.26049e-07	5.87419e-11	0.000399886	2.92696e-06	55	41	27	23	377	180	150	88	289	795
	GO:0007155~cell adhesion	10.1299	18.1818	13.5484	21.7391	12.9139	11.2583	6.95364	6.62252	5.57143	4.85714	3	2.85714	2.10699	3.8472	2.85146	4.62899	2.08611	3.80908	2.8232	4.58312	0.0233867	3.58933e-08	0.0606016	4.41007e-05	0.0435879	8.56054e-08	0.0817144	6.38115e-05	39	34	21	20	377	180	150	88	302	700
	GO:0007267~cell-cell signaling	10.3896	17.1123	14.1935	22.8261	19.7044	15.7635	10.8374	10.3448	6.66667	5.33333	3.66667	3.5	3.21491	5.38675	4.44407	7.2308	2.4962	4.18252	3.45058	5.61432	1.2616e-07	1.7597e-11	2.29989e-05	5.40511e-09	0.000440107	3.62109e-08	0.00229417	7.65155e-07	40	32	22	21	377	180	150	88	203	600
	GO:0010646~regulation of cell communication	21.8182	31.016	22.5806	29.3478	16.092	11.1111	6.70498	5.17241	8.09249	5.58767	3.37187	2.60116	2.62551	3.79691	2.74949	3.6154	3.03007	4.38197	3.17315	4.17249	4.77517e-14	1.31349e-16	9.56349e-05	9.75899e-06	4.40048e-17	4.02895e-19	3.50335e-06	5.6557e-07	84	58	35	27	377	180	150	88	522	1038
	GO:0010647~positive regulation of cell communication	11.4286	18.7166	11.6129	17.3913	27.1605	21.6049	11.1111	9.87654	13.3739	10.6383	5.47112	4.86322	4.43141	7.38289	4.5563	6.90348	5.00757	8.34279	5.14869	7.80105	4.82572e-14	1.96767e-17	0.000507622	9.30152e-06	5.06558e-15	2.12392e-18	0.00012111	2.34569e-06	44	35	18	16	377	180	150	88	162	329
	GO:0010648~negative regulation of cell communication	6.49351	6.95187	7.09677	6.52174	19.5312	10.1562	8.59375	4.6875	10.0806	5.24194	4.43548	2.41935	3.18665	3.47062	3.52401	3.27646	3.77449	4.11084	4.17409	3.88087	0.00108572	0.566934	1.75782	45.1126	9.22533e-05	0.137109	0.52672	27.4227	25	13	11	6	377	180	150	88	128	248
	GO:0016337~cell-cell adhesion	3.37662	5.88235	5.16129	7.6087	11.9266	10.0917	7.33945	6.42202			2.89855	2.53623	1.9459	3.44857	3.00966	4.48884			2.72773	4.06835	46.0246	2.1046	24.8584	7.05805			38.3124	11.5442	13	11	8	7	377	180	150	88	109	276
	GO:0022407~regulation of cell-cell adhesion	1.2987	1.60428	2.58065		33.3333	20	26.6667		22.7273	13.6364	18.1818		5.43855	6.83444	10.9351		8.50977	10.6939	17.1103		18.1391	72.0137	8.59619		4.41271	43.2268	2.65007		5	3	4		377	180	150	88	15	22
	GO:0022409~positive regulation of cell-cell adhesion	1.03896		1.93548		57.1429		42.8571				27.2727		9.32323		17.5743				25.6655		11.3381		18.0527				9.55839		4		3		377	180	150	88	7	11
	GO:0022610~biological adhesion	10.1299	18.1818	13.5484	21.7391	12.9139	11.2583	6.95364	6.62252	5.56348	4.85021	2.99572	2.85307	2.10699	3.8472	2.85146	4.62899	2.08313	3.80365	2.81917	4.57658	0.0233867	3.58933e-08	0.0606016	4.41007e-05	0.0453448	8.88944e-08	0.0833603	6.52773e-05	39	34	21	20	377	180	150	88	302	701
	GO:0030036~actin cytoskeleton organization		5.34759				7.93651								2.71208								17.6789								10			377	180	150	88	126
	GO:0030155~regulation of cell adhesion	5.45455	9.09091	9.03226	11.9565	32.8125	26.5625	21.875	17.1875	15.3285	12.4088	10.219	8.0292	5.35357	9.077	8.97021	12.0137	5.73943	9.73122	9.61674	12.8796	9.55481e-07	3.48357e-08	4.65301e-06	2.63665e-05	1.0705e-06	3.164e-08	3.6317e-06	1.93681e-05	21	17	14	11	377	180	150	88	64	137
	GO:0030198~extracellular matrix organization	3.8961	5.34759	5.16129	7.6087	27.7778	18.5185	14.8148	12.963	14.4231	9.61538	7.69231	6.73077	4.53212	6.32819	6.07506	9.06082	5.40043	7.5406	7.23897	10.7968	0.00498373	0.0374767	0.506634	0.172881	0.00116927	0.0120639	0.200487	0.0738872	15	10	8	7	377	180	150	88	54	104
	GO:0034329~cell junction assembly	1.55844	2.6738	1.93548		26.087	21.7391					7.31707		4.25626	7.42874					6.88585		18.5212	6.85888					71.6682		6	5	3		377	180	150	88	23	41
	GO:0034330~cell junction organization	2.33766	3.74332	3.87097	4.34783	27.2727	21.2121	18.1818	12.1212	15.7895	12.2807	10.5263	7.01754	4.44972	7.24865	7.45576	8.47245	5.91205	9.6308	9.90596	11.2568	1.17434	0.571129	1.85865	17.2523	0.225722	0.144455	0.576167	8.56219	9	7	6	4	377	180	150	88	33	57
	GO:0043062~extracellular structure organization	4.41558	5.88235	5.16129	7.6087	20.7317	13.4146	9.7561	8.53659	10.4294	6.74847	4.90798	4.29448	3.38251	4.58408	4.00065	5.96688	3.9051	5.2923	4.61873	6.88873	0.0506078	0.209853	6.02398	1.69678	0.0133497	0.0769619	2.96083	0.862237	17	11	8	7	377	180	150	88	82	163
	GO:0045216~cell-cell junction organization	1.2987		2.58065		26.3158		21.0526				11.4286		4.29359		8.63298				10.755		37.6273		16.3719				9.83296		5		4		377	180	150	88	19	35
	GO:0051893~regulation of focal adhesion formation	0.779221		1.29032		60						25		9.78939						23.5267		45.6373						77.4077		3		2		377	180	150	88	5	8
	GO:0051895~negative regulation of focal adhesion formation		1.06952				66.6667								22.7815								79.3711								2			377	180	150	88	3
	GO:0000904~cell morphogenesis involved in differentiation	6.23377	9.62567	7.09677	10.8696	21.2389	15.9292	9.73451	8.84956	9.83607	7.37705	4.5082	4.09836	3.46527	5.44336	3.9918	6.18564	3.68292	5.78525	4.24251	6.57414	0.00040164	3.55413e-05	0.659158	0.0459451	0.000284864	2.37236e-05	0.462704	0.0323541	24	18	11	10	377	180	150	88	113	244
	GO:0001701~in utero embryonic development	5.45455		3.87097		21.875		6.25		11.9318		3.40909		3.56905		2.56292		4.46763		3.20818		0.00170564		77.9685		8.6874e-05		50.0357		21		6		377	180	150	88	96	176
	GO:0001702~gastrulation with mouth forming second	1.03896				40								6.52626								30.371								4				377	180	150	88	10
	GO:0001704~formation of primary germ layer	2.33766	2.13904			37.5	16.6667			22.5	10			6.11837	5.69537			8.42467	7.84222			0.101666	43.2554			0.0156037	22.2747			9	4			377	180	150	88	24	40
	GO:0001707~mesoderm formation	2.07792	2.13904			34.7826	17.3913			22.2222	11.1111			5.67501	5.943			8.32066	8.71358			0.570374	39.6787			0.0701031	17.1881			8	4			377	180	150	88	23	36
	GO:0001708~cell fate specification	2.33766	3.20856			56.25	37.5			17.6471	11.7647			9.17755	12.8146			6.60758	9.22614			0.00274895	0.118256			0.10002	0.805991			9	6			377	180	150	88	16	51
	GO:0001709~cell fate determination	1.2987				38.4615								6.27525								10.888								5				377	180	150	88	13
	GO:0001756~somitogenesis	2.33766	2.6738			52.9412	29.4118			26.4706	14.7059			8.6377	10.0507			9.91137	11.5327			0.0049172	2.16197			0.00423654	1.5233			9	5			377	180	150	88	17	34
	GO:0001824~blastocyst development	2.07792				26.6667				18.6047				4.35084				6.96613				3.22437				0.230361				8				377	180	150	88	30	43
	GO:0001825~blastocyst formation	1.03896				33.3333								5.43855								45.6715								4				377	180	150	88	12
	GO:0001829~trophectodermal cell differentiation	1.03896				40								6.52626								30.371								4				377	180	150	88	10
	GO:0001838~embryonic epithelial tube formation	1.2987		1.93548		17.2414						6.97674		2.81304						6.56558		84.5868						74.7072		5		3		377	180	150	88	29	43
	GO:0001841~neural tube formation	1.2987		1.93548		18.5185						7.5		3.02142						7.058		77.7462						70.0577		5		3		377	180	150	88	27	40
	GO:0001892~embryonic placenta development	2.07792		2.58065		50		25		33.3333		16.6667		8.15782		10.2517		12.481		15.6844		0.0387925		10.3036		0.00383057		3.41692		8		4		377	180	150	88	16	24
	GO:0007275~multicellular organismal development	50.6494	61.4973	58.0645	64.1304	15.5502	9.17065	7.17703	4.70494	6.80628	4.01396	3.14136	2.05934	2.53712	3.13382	2.94306	3.28865	2.54847	3.14784	2.95623	3.30336	5.36214e-41	2.85837e-34	3.27894e-23	9.10411e-18	2.14293e-39	1.09689e-33	6.41381e-23	1.14988e-17	195	115	90	59	377	180	150	88	1254	2865
	GO:0007368~determination of left/right symmetry	2.07792	2.13904	2.58065		34.7826	17.3913	17.3913				9.52381		5.67501	5.943	7.13159				8.96254		0.570374	39.6787	26.3348				15.837		8	4	4		377	180	150	88	23	42
	GO:0007369~gastrulation	3.63636	3.20856			33.3333	14.2857			20	8.57143			5.43855	4.88175			7.48859	6.7219			0.00123804	11.7864			6.04119e-05	3.38016			14	6			377	180	150	88	42	70
	GO:0007398~ectoderm development	4.15584	5.34759	3.22581	4.34783	27.5862	17.2414	8.62069	6.89655	8.0402	5.02513			4.50087	5.89176	3.53506	4.82053	3.01049	3.94082			0.00226161	0.0678771	60.1879	57.2332	0.523147	1.76393			16	10	5	4	377	180	150	88	58	199
	GO:0007492~endoderm development	1.03896			2.17391	66.6667			33.3333					10.8771			23.2992					6.93916			76.928					4			2	377	180	150	88	6
	GO:0007498~mesoderm development	3.11688	3.20856	2.58065		30.7692	15.3846	10.2564		16.2162	8.10811	5.40541		5.0202	5.25726	4.20581		6.07183	6.35856	5.08685		0.0247701	8.69385	70.641		0.0069902	4.30057	54.0286		12	6	4		377	180	150	88	39	74
	GO:0009790~embryonic development	17.1429	15.508	15.4839	14.1304	23.5714	10.3571	8.57143	4.64286	11.6197	5.10563	4.22535	2.28873	3.84583	3.53927	3.51486	3.24525	4.35077	4.00395	3.97634	3.67133	4.10776e-19	1.11947e-05	0.000342841	0.887322	8.11218e-21	1.12216e-06	4.89414e-05	0.309495	66	29	24	13	377	180	150	88	280	568
	GO:0009792~embryonic development ending in birth or egg hatching	10.1299	6.95187	9.03226	6.52174	23.9264	7.97546	8.58896	3.68098	11.6766	3.89222	4.19162	1.79641	3.90374	2.72539	3.52204	2.57292	4.37208	3.05236	3.94459	2.8816	4.23006e-10	4.69309	0.253209	76.2003	5.97966e-11	2.02689	0.0937705	62.3064	39	13	14	6	377	180	150	88	163	334
	GO:0009948~anterior/posterior axis specification	0.779221	5.34759	1.29032	2.17391	75	18.8679	50	50		7.14286		12.5	12.2367	6.44759	20.5033	34.9489		5.60159		20.0511	31.517	0.0320243	82.0716	62.3765		0.13012		81.6857	3	10	2	2	377	180	150	88	4	140
	GO:0009950~dorsal/ventral axis specification	0.779221				50								8.15782								58.7019								3				377	180	150	88	6
	GO:0009952~anterior/posterior pattern formation	5.19481				37.7358				14.2857				6.15685				5.349				1.75939e-07				1.01069e-05				20				377	180	150	88	53	140
	GO:0009953~dorsal/ventral pattern formation	1.55844				28.5714								4.66161								12.7785								6				377	180	150	88	21
	GO:0010769~regulation of cell morphogenesis involved in differentiation	3.37662	4.27807	4.51613	5.43478	26.5306	16.3265	14.2857	10.2041	16.8831	10.3896	9.09091	6.49351	4.32864	5.57914	5.8581	7.13242	6.32154	8.14776	8.55515	10.4162	0.0486174	0.852159	1.87797	8.03668	0.0015041	0.0950564	0.279948	2.19517	13	8	7	5	377	180	150	88	49	77
	GO:0010770~positive regulation of cell morphogenesis involved in differentiation	1.55844	1.60428	1.93548	2.17391	100	50	50	33.3333	85.7143	42.8571	42.8571	28.5714	16.3156	17.0861	20.5033	23.2992	32.094	33.6095	40.3314	45.8312	0.00862979	18.9054	13.4346	76.928	0.000477569	5.5838	3.86043	52.4036	6	3	3	2	377	180	150	88	6	7
	GO:0017145~stem cell division	0.779221	1.60428	1.29032	2.17391	75	75	50	50			22.2222	22.2222	12.2367	25.6292	20.5033	34.9489			20.9126	35.6465	31.517	8.31528	82.0716	62.3765			81.2423	61.5033	3	3	2	2	377	180	150	88	4	9
	GO:0019827~stem cell maintenance	1.81818	2.13904	2.58065	4.34783	43.75	25	25	25	28	16	16	16	7.1381	8.54306	10.2517	17.4744	10.484	12.5476	15.0571	25.6655	0.431183	16.7869	10.3036	2.27331	0.0719601	6.48311	3.84502	0.805634	7	4	4	4	377	180	150	88	16	25
	GO:0021915~neural tube development	2.07792				22.2222								3.6257								9.3436								8				377	180	150	88	36
	GO:0030154~cell differentiation	34.026	43.8503	38.7097	46.7391	18.2706	11.4365	8.3682	5.99721	8.00244	5.00916	3.66524	2.62676	2.98096	3.90812	3.43152	4.19191	2.99635	3.9283	3.44924	4.21356	6.57573e-31	2.4642e-27	9.7958e-16	2.29461e-14	1.6819e-29	9.51454e-27	1.69681e-15	2.99445e-14	131	82	60	43	377	180	150	88	717	1637
	GO:0030326~embryonic limb morphogenesis	2.85714	3.74332			26.1905	16.6667			12.6437	8.04598			4.27315	5.69537			4.73417	6.30983			0.295622	2.16097			0.187072	1.46043			11	7			377	180	150	88	42	87
	GO:0035113~embryonic appendage morphogenesis	2.85714	3.74332			26.1905	16.6667			12.6437	8.04598			4.27315	5.69537			4.73417	6.30983			0.295622	2.16097			0.187072	1.46043			11	7			377	180	150	88	42	87
	GO:0035116~embryonic hindlimb morphogenesis	1.2987				62.5								10.1973								1.42761								5				377	180	150	88	8
	GO:0045165~cell fate commitment	7.27273	7.48663	7.09677	7.6087	51.8519	25.9259	20.3704	12.963	20.1439	10.0719	7.91367	5.03597	8.45997	8.85947	8.35321	9.06082	7.54247	7.89864	7.44729	8.07816	4.98679e-16	4.84005e-06	0.000864947	0.172881	6.10623e-13	4.09378e-05	0.00370186	0.367766	28	14	11	7	377	180	150	88	54	139
	GO:0045168~cell-cell signaling involved in cell fate specification	1.2987	1.60428		2.17391	71.4286	42.8571		28.5714					11.654	14.6452		19.9708					0.752312	25.0564		81.9336					5	3		2	377	180	150	88	7
	GO:0045595~regulation of cell differentiation	20.5195	25.1337	25.1613	29.3478	32.5103	19.3416	16.0494	11.1111	16.0569	9.55285	7.92683	5.4878	5.30426	6.60944	6.58132	7.76641	6.01218	7.49155	7.45967	8.80294	2.40404e-34	1.02792e-22	3.94684e-18	1.88738e-13	1.01269e-35	3.53461e-24	1.83373e-19	1.48151e-14	79	47	39	27	377	180	150	88	243	492
	GO:0045596~negative regulation of cell differentiation	9.35065	11.7647	12.2581	14.1304	32.1429	19.6429	16.9643	11.6071	16.6667	10.1852	8.7963	6.01852	5.24432	6.7124	6.95649	8.11313	6.2405	7.98745	8.2779	9.65425	1.9984e-13	8.80276e-09	2.09233e-07	7.10317e-05	8.85161e-15	7.1908e-10	2.18949e-08	1.34737e-05	36	22	19	13	377	180	150	88	112	216
	GO:0045597~positive regulation of cell differentiation	11.1688	13.9037	13.5484	17.3913	40.566	24.5283	19.8113	15.0943	18.7773	11.3537	9.17031	6.9869	6.61861	8.38187	8.12396	10.5506	7.03078	8.90383	8.62987	11.2076	3.52295e-21	1.9984e-13	7.78755e-10	2.0743e-08	2.41754e-20	1.9984e-13	6.0294e-10	1.43894e-08	43	26	21	16	377	180	150	88	106	229
	GO:0045995~regulation of embryonic development	1.81818	3.20856	2.58065	3.26087	100	85.7143	57.1429	42.8571	53.8462	46.1538	30.7692	23.0769	16.3156	29.2905	23.4324	29.9562	20.1616	36.1949	28.9559	37.0175	0.000606942	0.000704696	0.79234	6.58879	0.00091488	0.00065465	0.533013	4.69947	7	6	4	3	377	180	150	88	7	13
	GO:0048332~mesoderm morphogenesis	2.07792	2.13904			34.7826	17.3913			21.0526	10.5263			5.67501	5.943			7.88273	8.25497			0.570374	39.6787			0.10122	19.6639			8	4			377	180	150	88	23	38
	GO:0048340~paraxial mesoderm morphogenesis	0.779221				50								8.15782								58.7019								3				377	180	150	88	6
	GO:0048562~embryonic organ morphogenesis	2.5974	2.6738	3.22581		22.2222	11.1111	11.1111				3.7594		3.6257	3.79691	4.5563				3.53784		2.41379	52.487	33.2815				61.0135		10	5	5		377	180	150	88	45	133
	GO:0048568~embryonic organ development	4.41558	3.20856	5.80645	4.34783	25.3731	8.95522	13.4328	5.97015	9.88372	3.48837	5.23256	2.32558	4.13979	3.0602	5.50836	4.173	3.70076	2.73566	4.92419	3.73044	0.00318047	55.719	0.334197	70.4479	0.0264387	71.487	0.83525	80.1536	17	6	9	4	377	180	150	88	67	172
	GO:0048598~embryonic morphogenesis	9.35065	9.09091	6.45161	6.52174	24.6575	11.6438	6.84932	4.10959	11.7264	5.53746	3.25733	1.9544	4.02304	3.97896	2.80868	2.87251	4.39071	4.3426	3.06536	3.13503	1.65021e-09	0.00768982	14.1942	62.2149	6.17539e-10	0.00328984	8.90016	51.2867	36	17	10	6	377	180	150	88	146	307
	GO:0048863~stem cell differentiation	1.81818	2.13904	2.58065	4.34783	41.1765	23.5294	23.5294	23.5294			12.5	12.5	6.71821	8.04052	9.64863	16.4465			11.7633	20.0511	0.631741	19.6399	12.173	2.72642			7.70814	1.67716	7	4	4	4	377	180	150	88	17	32
	GO:0048864~stem cell development	1.81818	2.13904	2.58065	4.34783	41.1765	23.5294	23.5294	23.5294	26.9231	15.3846	15.3846	15.3846	6.71821	8.04052	9.64863	16.4465	10.0808	12.065	14.4779	24.6783	0.631741	19.6399	12.173	2.72642	0.0914546	7.23386	4.30354	0.906241	7	4	4	4	377	180	150	88	17	26
	GO:0051093~negative regulation of developmental process	11.1688	13.369	15.4839	17.3913	32.8244	19.084	18.3206	12.2137	16.6023	9.65251	9.26641	6.17761	5.35552	6.52142	7.51267	8.53713	6.2164	7.56971	8.72031	9.90944	4.81877e-17	3.98104e-10	5.95191e-11	4.61838e-07	3.35128e-18	3.91576e-11	6.02851e-12	8.33377e-08	43	25	24	16	377	180	150	88	131	259
	GO:0051094~positive regulation of developmental process	13.2468	17.1123	16.129	19.5652	39.2308	24.6154	19.2308	13.8462	18.3453	11.5108	8.99281	6.47482	6.40075	8.41162	7.8859	9.67815	6.86903	9.02702	8.46283	10.3862	5.36406e-25	2.14242e-17	4.66294e-12	2.83765e-09	2.6884e-24	1.64703e-17	2.72005e-12	1.52508e-09	51	32	25	18	377	180	150	88	130	278
	GO:0008543~fibroblast growth factor receptor signaling pathway	2.07792	4.27807	2.58065	4.34783	61.5385	61.5385	30.7692	30.7692	27.5862	27.5862	13.7931	13.7931	10.0404	21.0291	12.6174	21.507	10.3291	21.6337	12.9802	22.1254	0.00683677	4.14889e-05	5.68109	1.20335	0.0153964	0.00010299	5.86479	1.25466	8	8	4	4	377	180	150	88	13	29
	GO:0008593~regulation of Notch signaling pathway	1.03896		1.93548	2.17391	50		37.5				27.2727	18.1818	8.15782		15.3775				25.6655	29.1653	16.8243		23.0285				9.55839	68.8643	4		3	2	377	180	150	88	8	11
	GO:0016055~Wnt receptor signaling pathway	4.41558	5.34759			23.2877	13.6986			12.782	7.5188			3.79953	4.68113			4.78594	5.89641			0.0106277	0.42447			0.000890923	0.0872376			17	10			377	180	150	88	73	133
	GO:0017015~regulation of transforming growth factor beta receptor signaling pathway	2.07792	2.13904	2.58065		34.7826	17.3913	17.3913		20.5128	10.2564	10.2564		5.67501	5.943	7.13159		7.68061	8.0433	9.65197		0.570374	39.6787	26.3348		0.120557	20.9533	13.0914		8	4	4		377	180	150	88	23	39
	GO:0030509~BMP signaling pathway	3.11688	3.74332	4.51613	4.34783	38.7097	22.5806	22.5806	12.9032	27.2727	15.9091	15.9091	9.09091	6.31574	7.71631	9.25957	9.01906	10.2117	12.4763	14.9715	14.5826	0.0019531	0.3988	0.14273	14.7064	2.62472e-05	0.0322212	0.0111073	4.19488	12	7	7	4	377	180	150	88	31	44
	GO:0030510~regulation of BMP signaling pathway	1.03896		1.93548		25		18.75				10		4.07891		7.68875				9.41067		73.3622		63.5781				50.8179		4		3		377	180	150	88	16	30
	GO:0030511~positive regulation of transforming growth factor beta receptor signaling pathway	1.03896	1.60428			57.1429	42.8571							9.32323	14.6452							11.3381	25.0564							4	3			377	180	150	88	7
	GO:0030514~negative regulation of BMP signaling pathway	1.03896		1.93548		30.7692		23.0769				14.2857		5.0202		9.46308				13.4438		53.2912		49.4279				30.2828		4		3		377	180	150	88	13	21
	GO:0030947~regulation of vascular endothelial growth factor receptor signaling pathway	1.03896	1.60428	1.29032	2.17391	66.6667	50		33.3333			22.2222	22.2222	10.8771	17.0861		23.2992			20.9126	35.6465	6.93916	18.9054		76.928			81.2423	61.5033	4	3	2	2	377	180	150	88	6	9
	GO:0030949~positive regulation of vascular endothelial growth factor receptor signaling pathway	1.03896	1.60428	1.29032	2.17391	100	75	50	50			28.5714	28.5714	16.3156	25.6292	20.5033	34.9489			26.8876	45.8312	1.56327	8.31528	82.0716	62.3765			72.7895	52.4036	4	3	2	2	377	180	150	88	4	7
	GO:0032909~regulation of transforming growth factor-beta2 production	0.779221		1.29032		100		66.6667				50		16.3156		27.3378				47.0533		17.8206		72.4449				52.4636		3		2		377	180	150	88	3	4
	GO:0032925~regulation of activin receptor signaling pathway	1.03896	1.60428	1.93548	2.17391	57.1429	42.8571	42.8571	28.5714			30	20	9.32323	14.6452	17.5743	19.9708			28.232	32.0818	11.3381	25.0564	18.0527	81.9336			7.93988	65.3787	4	3	3	2	377	180	150	88	7	10
	GO:0032927~positive regulation of activin receptor signaling pathway		1.06952				66.6667								22.7815								79.3711								2			377	180	150	88	3
	GO:0006928~cell motion	13.2468	24.5989	18.0645	27.1739	23.3945	21.1009	12.844	11.4679	10.7368	9.68421	5.89474	5.26316	3.81696	7.21065	5.26691	8.01579	4.02019	7.59457	5.54734	8.44258	8.00808e-14	8.04798e-24	1.9751e-09	1.90958e-12	7.67425e-14	8.24333e-24	1.12865e-09	9.54792e-13	51	46	28	25	377	180	150	88	218	475
	GO:0008283~cell proliferation	10.1299	13.9037	9.03226	11.9565	17.4888	11.6592	6.27803	4.93274	8.94495	5.9633	3.21101	2.52294	2.85341	3.98421	2.57441	3.44787	3.34926	4.67655	3.02177	4.04702	8.18199e-06	7.72075e-06	4.78151	1.88666	2.17916e-07	4.58528e-07	1.25648	0.582627	39	26	14	11	377	180	150	88	223	436
	GO:0008284~positive regulation of cell proliferation	14.8052	21.9251	17.4194	21.7391	27.9412	20.098	13.2353	9.80392	13.7681	9.90338	6.52174	4.83092	4.55878	6.86795	5.42735	6.85272	5.15519	7.76645	6.13739	7.74923	7.55436e-20	7.00849e-20	2.78829e-09	5.5857e-08	4.3816e-21	4.36544e-21	3.21698e-10	9.62903e-09	57	41	27	20	377	180	150	88	204	414
	GO:0008285~negative regulation of cell proliferation	10.1299	12.2995	13.5484	15.2174	21.6667	12.7778	11.6667	7.77778	10.8033	6.37119	5.81717	3.87812	3.53506	4.36645	4.78411	5.43649	4.04509	4.99643	5.47435	6.22085	1.13806e-08	1.43459e-05	1.53843e-05	0.00198049	7.13907e-10	1.92353e-06	2.31099e-06	0.000512745	39	23	21	14	377	180	150	88	180	361
	GO:0042127~regulation of cell proliferation	25.1948	32.6203	30.9677	34.7826	24.557	15.443	12.1519	8.10127	12.3253	7.75095	6.09911	4.06607	4.00663	5.27723	4.98309	5.6626	4.61495	6.07847	5.73967	6.52235	5.97626e-32	1.62749e-25	4.01729e-18	7.66054e-13	4.45669e-35	5.05235e-28	3.35241e-20	2.16423e-14	97	61	48	32	377	180	150	88	395	787
	GO:0051129~negative regulation of cellular component organization			5.80645	5.43478	15.1163	10.4651	10.4651	5.81395			6.33803	3.52113	2.46632	3.57616	4.2914	4.06382			5.96451	5.64821	9.89022	5.83306	1.83214	43.742			0.227815	17.9586	13	9	9	5	377	180	150	88	86	142
	GO:0051130~positive regulation of cellular component organization	7.01299	8.02139	6.45161	7.6087	27.551	15.3061	10.2041	7.14286	14.9171	8.28729	5.52486	3.8674	4.49513	5.23044	4.18435	4.99269	5.58542	6.49908	5.19926	6.20367	1.40804e-07	0.00129048	0.986503	4.2095	3.88303e-09	0.000130747	0.224581	1.48973	27	15	10	7	377	180	150	88	98	181
	GO:0051270~regulation of cell motion	10.3896	17.6471	16.7742	21.7391	37.7358	31.1321	24.5283	18.8679	20.7254	17.0984	13.4715	10.3627	6.15685	10.6385	10.0582	13.1883	7.7602	13.409	12.6776	16.6227	4.14345e-18	1.52485e-21	2.11488e-15	1.88738e-13	2.49087e-20	1.21076e-23	3.21219e-17	7.93472e-15	40	33	26	20	377	180	150	88	106	193
	GO:0051271~negative regulation of cell motion	2.85714	4.27807	5.80645	6.52174	32.3529	23.5294	26.4706	17.6471	17.4603	12.6984	14.2857	9.52381	5.27859	8.04052	10.8547	12.3349	6.53766	9.95838	13.4438	15.2771	0.0409846	0.077414	0.00183233	0.174072	0.0105425	0.0253919	0.00053006	0.0720435	11	8	9	6	377	180	150	88	34	63
	GO:0051272~positive regulation of cell motion	6.75325	11.7647	10.3226	14.1304	48.1481	40.7407	29.6296	24.0741	26.5306	22.449	16.3265	13.2653	7.85568	13.922	12.1501	16.8272	9.93385	17.605	15.3644	21.2788	1.9984e-13	6.58472e-16	1.92493e-09	1.06884e-08	7.64567e-15	4.16033e-17	1.66489e-10	1.24364e-09	26	22	16	13	377	180	150	88	54	98
KEGG	hsa03022:Basal transcription factors	4.41558		2.58065		85		20		48.5714		11.4286		7.40856		4.39216		9.61034		5.69748		2.00689e-09		48.2011		2.11764e-09		29.6128		17		4		257	152	102	74	20	35	2240	5085
	hsa04060:Cytokine-cytokine receptor interaction	8.83117	18.1818	13.5484	22.8261	50	50	30.8824	30.8824	12.9771	12.9771	8.01527	8.01527	4.35798	7.36842	6.78201	9.34817	2.56765	4.34135	3.99585	5.50779	1.00697e-11	2.91043e-19	2.85247e-09	3.34177e-12	0.000718106	4.81382e-10	0.00014348	3.33756e-07	34	34	21	21	257	152	102	74	68	262
	hsa04510:Focal adhesion	8.31169	13.9037	9.03226	14.1304	25.3968	20.6349	11.1111	10.3175	15.9204	12.9353	6.96517	6.46766	2.21358	3.04094	2.44009	3.12312	3.15001	4.32738	3.47234	4.44433	0.016646	0.000414216	3.80912	0.615207	1.47173e-05	6.59658e-07	0.162137	0.0246988	32	26	14	13	257	152	102	74	126	201
	hsa04512:ECM-receptor interaction	4.41558	9.09091	5.80645	9.78261	37.7778	37.7778	20	20	20.2381	20.2381	10.7143	10.7143	3.29269	5.56725	4.39216	6.05405	4.00431	6.77044	5.34139	7.36245	0.0184262	1.11549e-05	0.763139	0.0758222	0.00356867	2.10579e-06	0.252518	0.0238824	17	17	9	9	257	152	102	74	45	84
	hsa04514:Cell adhesion molecules (CAMs)		4.27807				14.2857								2.10526								60.5557								8			257	152	102	74	56
	hsa04520:Adherens junction	5.19481	5.34759	4.51613	5.43478	35.0877	17.5439	12.2807		25.974	12.987	9.09091	6.49351	3.05823	2.58541	2.69694		5.13922	4.34467	4.53209	4.46209	0.00859666	13.2075	36.6899		4.70691e-06	0.459963	4.32711	23.016	20	10	7	5	257	152	102	74	57	77
	hsa04810:Regulation of actin cytoskeleton	5.19481	9.62567	5.80645	9.78261	17.3913	15.6522		7.82609			4.18605	4.18605	1.51582	2.30664		2.36898			2.08687	2.87649	49.9593	1.52278		28.6681	50.9378	11.4884			20	18	9	9	257	152	102	74	115	215
	hsa04320:Dorso-ventral axis formation	1.55844		3.22581	3.26087	42.8571		35.7143	21.4286			20	12	3.73541		7.84314	6.48649			9.97059	8.24595	16.6371		2.98079	56.2087			1.46935	41.8852	6		5	3	257	152	102	74	14	25
	hsa04010:MAPK signaling pathway	8.83117	12.8342	8.3871	11.9565	22.973	16.2162	8.78378	7.43243	12.7341	8.98876	4.86891	4.11985	2.00231	2.38976	1.92899	2.24982	2.51956	3.0071	2.4273	2.83101	0.0775092	0.0926728	29.4476	19.193	0.00111568	0.00324047	6.62873	4.66814	34	24	13	11	257	152	102	74	148	267
	hsa04310:Wnt signaling pathway	7.53247	5.88235	4.51613		31.1828	11.828			19.2053	7.28477	4.63576		2.71788	1.74307			3.79996	2.43704	2.31106		0.000585274	66.3896			1.12681e-06	14.5618	59.4167		29	11	7		257	152	102	74	93	151
	hsa04330:Notch signaling pathway	3.11688	3.20856			54.5455	27.2727			25.5319	12.766			4.75416	4.01914			5.05174	4.27072			0.0090386	14.2224			0.0168556	12.9314			12	6			257	152	102	74	22	47
	hsa04350:TGF-beta signaling pathway	7.01299	6.95187	10.3226	9.78261	44.2623	21.3115	26.2295	14.7541	31.0345	14.9425	18.3908	10.3448	3.85788	3.14064	5.76021	4.46611	6.14048	4.99887	9.16836	7.10857	3.43706e-07	0.623766	3.1944e-05	0.67867	3.88689e-11	0.00894396	9.17583e-08	0.0309282	27	13	16	9	257	152	102	74	61	87
	hsa04370:VEGF signaling pathway	2.85714	3.74332			24.4444	15.5556							2.13057	2.2924							26.8824	60.2441							11	7			257	152	102	74	45
	hsa04722:Neurotrophin signaling pathway	3.63636				18.9189								1.64896								57.7197								14				257	152	102	74	74
	hsa04110:Cell cycle	5.45455		4.51613		25.3012				16.8		5.6		2.20524				3.32405		2.79176		0.806813				0.00364826		34.0944		21		7		257	152	102	74	83	125
	hsa05200:Pathways in cancer	20.2597	20.8556	20	21.7391	39.7959	19.898	15.8163	10.2041	23.7805	11.8902	9.45122	6.09756	3.46859	2.93233	3.47339	3.0888	4.70521	3.97776	4.71171	4.19001	5.64419e-24	3.55335e-07	4.30763e-07	0.0082546	1.2144e-30	8.45768e-11	3.74412e-10	9.95596e-05	78	39	31	20	257	152	102	74	196	328

## Sheet: C) Specific
Term		%		% (human)	% (human)	% (hESC)	% (hESC)	Fold Enrichment (human)	Fold Enrichment (human)	Fold Enrichment (hESC)	Fold Enrichment (hESC)	FDR (human)	FDR (human)	FDR (hESC)	FDR (hESC)	Count	Count (human)	List Total	List Total (hESC)	Pop Hits (human)	Pop Hits (hESC)	Pop Total (human)	Pop Total (hESC)
		ALL_EC+TF	ALL_EC	ALL_EC+TF	ALL_EC	ALL_EC+TF	ALL_EC	ALL_EC+TF	ALL_EC	ALL_EC+TF	ALL_EC	ALL_EC+TF	ALL_EC	ALL_EC+TF	ALL_EC	ALL_EC+TF	ALL_EC	ALL_EC+TF	ALL_EC
GO	GO:0010468~regulation of gene expression	41.3793		0.420168		0.851064		2.1967		1.93885		12.1008		27.9239		12		27	16	2856	1410	14116	6151
	GO:0010628~positive regulation of gene expression	17.2414		0.860585		1.79211		4.49927		4.0827		26.8156		34.7586		5				581	279
	GO:0045449~regulation of transcription	37.931		0.422914		0.872324		2.21106		1.98728		18.111		33.6085		11				2601	1261
	GO:0045941~positive regulation of transcription	17.2414		0.886525		1.82482		4.63488		4.1572		24.633		33.1366		5				564	274
	GO:0007154~cell communication	17.2414	22.2222	0.628931	0.503145	1.7301	1.38408	3.28814	4.43899	3.94143	5.32093	57.508	52.1998	38.0583	36.8829	5	4			795	289
	GO:0007267~cell-cell signaling	13.7931	22.2222	0.666667	0.666667	1.97044	1.97044	3.48543	5.88167	4.48896	7.57512	78.041	29.8546	55.5089	16.35	4	4			600	203
	GO:0016337~cell-cell adhesion	10.3448	16.6667			2.75229	2.75229			6.27013	10.5808			69.706	34.3632	3	3				109
	GO:0007275~multicellular organismal development	37.931	50	0.383944	0.314136	0.877193	0.717703	2.00732	2.77147	1.99838	2.75912	31.9896	6.64125	32.6166	6.79032	11	9			2865	1254
	GO:0007369~gastrulation		11.1111		2.85714		4.7619		25.2071		18.3065		66.7668		78.113		2			70	42
	GO:0009790~embryonic development	13.7931		0.704225				3.68179				73.4919				4				568
	GO:0009948~anterior/posterior axis specification	6.89655	11.1111			50	50			113.907	192.219			22.3813	13.4324	2	2				4
	GO:0019827~stem cell maintenance	6.89655	11.1111	8	8	12.5	12.5	41.8252	70.58	28.4769	48.0547	49.8225	32.4841	63.7394	43.8725	2	2			25	16
	GO:0030154~cell differentiation	24.1379	33.3333	0.427611	0.366524	0.97629	0.83682	2.23562	3.23366	2.22413	3.21705	67.6243	29.1693	68.2671	29.585	7	6			1637	717
	GO:0045595~regulation of cell differentiation	17.2414	27.7778	1.01626	1.01626	2.05761	2.05761	5.31316	8.96596	4.68755	7.91024	16.3278	2.14125	23.6762	3.34054	5	5			492	243
	GO:0045596~negative regulation of cell differentiation	10.3448	16.6667	1.38889	1.38889	2.67857	2.67857	7.26132	12.2535	6.10218	10.2974	60.0738	27.4156	71.4657	35.7959	3	3			216	112
	GO:0045597~positive regulation of cell differentiation	10.3448	16.6667	1.31004	1.31004	2.83019	2.83019	6.8491	11.5579	6.44759	10.8803	63.9738	30.082	67.8753	32.9317	3	3			229	106
	GO:0048598~embryonic morphogenesis		16.6667		0.977199		2.05479		8.62134		7.8994		46.1719		51.6341		3			307	146
	GO:0048863~stem cell differentiation	6.89655	11.1111			11.7647	11.7647			26.8017	45.2279			65.9701	45.8651	2	2				17
	GO:0048864~stem cell development	6.89655	11.1111	7.69231	7.69231	11.7647	11.7647	40.2165	67.8654	26.8017	45.2279	51.1889	33.5376	65.9701	45.8651	2	2			26	17
	GO:0051093~negative regulation of developmental process	10.3448	16.6667	1.1583	1.1583		2.29008	6.05577	10.2191		8.80391	72.0433	36.3065		44.7921	3	3			259	131
	GO:0051094~positive regulation of developmental process	10.3448	16.6667	1.07914	1.07914		2.30769	5.64189	9.52068		8.87163	76.4586	40.2471		44.3255	3	3			278	130
	GO:0008543~fibroblast growth factor receptor signaling pathway	6.89655	11.1111	6.89655	6.89655	15.3846	15.3846	36.0562	60.8448	35.0484	59.1442	55.0695	36.6009	56.134	37.446	2	2			29	13
	GO:0006928~cell motion	13.7931	22.2222	0.842105	0.842105	1.83486	1.83486	4.40265	7.42947	4.18009	7.0539	57.4224	17.248	62.0286	19.4886	4	4			475	218
	GO:0008284~positive regulation of cell proliferation	13.7931	16.6667	0.966184	0.724638	1.96078	1.47059	5.05135	6.39312	4.46696	5.65349	45.2736	65.7838	55.9557	73.7523	4	3			414	204
	GO:0042127~regulation of cell proliferation	17.2414	22.2222	0.635324	0.508259	1.26582	1.01266	3.32157	4.48412	2.88373	3.89304	56.3669	51.29	72.0422	64.1937	5	4			787	395
KEGG	hsa04060:Cytokine-cytokine receptor interaction		16.6667				4.41176				6.58824				42.8645		3		15		68		2240

## Sheet: D) Common
Term		%		% (human)	% (human)	% (hESC)	% (hESC)	Fold Enrichment (human)	Fold Enrichment (human)	Fold Enrichment (hESC)	Fold Enrichment (hESC)	FDR (human)	FDR (human)	FDR (hESC)	FDR (hESC)	Count	Count (human)	List Total	List Total (human)	Pop Hits (human)	Pop Hits (hESC)	Pop Total (human)	Pop Total (hESC)
		ALL_EC+TF	ALL_EC	ALL_EC+TF	ALL_EC	ALL_EC+TF	ALL_EC	ALL_EC+TF	ALL_EC	ALL_EC+TF	ALL_EC	ALL_EC+TF	ALL_EC	ALL_EC+TF	ALL_EC	ALL_EC+TF	ALL_EC	ALL_EC+TF	ALL_EC
GO	GO:0006350~transcription	34.127		2.04664		4.09134		2.34882		2.046		9.70896e-05		0.00385954		43		123	72	2101	1051	14116	6151
	GO:0010467~gene expression	36.5079		1.53384		2.94118		1.7603		1.47083		0.0899979		5.25128		46		123	72	2999	1564	14116
	GO:0010468~regulation of gene expression	52.381		2.31092		4.68085		2.65211		2.34081		9.65894e-13		3.41382e-10		66		123	72	2856	1410	14116
	GO:0010628~positive regulation of gene expression	21.4286	9.45946	4.64716	1.20482	9.67742		5.33328	2.36212	4.8395		5.75787e-09	71.7177	3.21866e-08		27	7	123	72	581	279	14116
	GO:0010629~negative regulation of gene expression	19.8413	9.45946	4.96032	1.38889	9.05797	2.53623	5.69267	2.72299	4.52972	2.16672	1.21643e-08	50.8293	9.25512e-07	82.6288	25	7	123	72	504	276	14116
	GO:0016481~negative regulation of transcription	19.0476	9.45946	5.22876	1.52505	9.83607	2.86885	6.00074	2.98995	4.91883	2.45088	1.26234e-08	37.9672	4.48248e-07	66.0305	24	7	123	72	459	244	14116
	GO:0045449~regulation of transcription	50		2.42215		4.99603		2.77976		2.49842		7.77156e-13		9.76774e-11		63		123	72	2601	1261	14116
	GO:0045941~positive regulation of transcription	20.6349		4.60993		9.48905		5.29055		4.7453		1.98031e-08		1.33634e-07		26		123	72	564	274	14116
	GO:0001952~regulation of cell-matrix adhesion	2.38095				21.4286				10.716				41.5861		3		123	72		14	14116
	GO:0007154~cell communication	17.4603	25.6757	2.7673	2.38994	7.61246	6.57439	3.17587	4.6856	3.80685	5.61654	0.00714526	8.39641e-05	0.000302458	4.06572e-06	22	19	123	72	795	289	14116
	GO:0007155~cell adhesion	14.2857	22.973	2.57143	2.42857	5.96026	5.62914	2.95108	4.76135	2.98062	4.809	0.185316	0.000476371	0.145962	0.000358561	18	17	123	72	700	302	14116
	GO:0007267~cell-cell signaling	14.2857	22.973	3	2.83333	8.867	8.37438	3.44293	5.55491	4.43422	7.15428	0.0269096	5.7458e-05	0.000704296	1.20619e-06	18	17	123	72	600	203	14116
	GO:0010646~regulation of cell communication	25.3968	33.7838	3.08285	2.40848	6.13027	4.78927	3.53801	4.72195	3.06563	4.0915	1.08123e-06	1.52608e-07	2.5807e-05	2.35473e-06	32	25	123	72	1038	522	14116
	GO:0010647~positive regulation of cell communication	13.4921	21.6216	5.16717	4.86322	10.4938	9.87654	5.93007	9.53462	5.24777	8.43759	4.04504e-05	1.13165e-07	0.000163807	4.61342e-07	17	16	123	72	329	162	14116
	GO:0010648~negative regulation of cell communication	7.93651	6.75676	4.03226	2.01613	7.8125	3.90625	4.62759	3.95273	3.90689	3.33713	0.520968	46.5474	1.60473	64.9393	10	5	123	72	248	128	14116
	GO:0022407~regulation of cell-cell adhesion	3.1746		18.1818		26.6667		20.8662		13.3355		1.48818		4.95006		4		123	72	22	15	14116
	GO:0022409~positive regulation of cell-cell adhesion	2.38095				42.8571				21.4321				12.5639		3		123	72		7	14116
	GO:0022610~biological adhesion	14.2857	22.973	2.56776	2.42511	5.96026	5.62914	2.94687	4.75456	2.98062	4.809	0.188549	0.000485643	0.145962	0.000358561	18	17	123	72	701	302	14116
	GO:0030155~regulation of cell adhesion	11.1111	14.8649	10.219	8.0292	21.875	17.1875	11.7277	15.7417	10.9393	14.6834	2.96245e-07	2.52652e-06	3.75795e-07	3.43148e-06	14	11	123	72	137	64	14116
	GO:0030198~extracellular matrix organization	6.34921	9.45946	7.69231	6.73077	14.8148	12.963	8.82802	13.196	7.40861	11.0743	0.0560482	0.0228445	0.144629	0.0541342	8	7	123	72	104	54	14116
	GO:0034329~cell junction assembly	2.38095				13.0435				6.5228				74.4404		3		123	72		23	14116
	GO:0034330~cell junction organization	4.7619	5.40541	10.5263	7.01754	18.1818	12.1212	12.0804	13.7583	9.09239	10.3552	0.225964	4.87747	0.746599	10.1476	6	4	123	72	57	33	14116
	GO:0043062~extracellular structure organization	6.34921	9.45946	4.90798	4.29448	9.7561	8.53659	5.6326	8.41956	4.87884	7.29285	0.920005	0.282804	1.94684	0.567913	8	7	123	72	163	82	14116
	GO:0045216~cell-cell junction organization	3.1746				21.0526				10.528				9.71488		4		123	72		19	14116
	GO:0051893~regulation of focal adhesion formation	1.5873				40				20.0033				82.5469		2		123	72		5	14116
	GO:0000904~cell morphogenesis involved in differentiation	7.93651	12.1622	4.09836	3.68852	8.84956	7.9646	4.70345	7.23156	4.4255	6.8042	0.46219	0.050233	0.647546	0.0698258	10	9	123	72	244	113	14116
	GO:0001892~embryonic placenta development	2.38095		12.5		18.75		14.3455		9.37652		27.2048		50.0457		3		123	72	24	16	14116
	GO:0007275~multicellular organismal development	62.6984	67.5676	2.75742	1.7452	6.29984	3.98724	3.16453	3.42156	3.15043	3.40632	1.35559e-22	1.28636e-15	8.09273e-23	1.11704e-15	79	50	123	72	2865	1254	14116
	GO:0007368~determination of left/right symmetry	2.38095				13.0435				6.5228				74.4404		3		123	72		23	14116
	GO:0007398~ectoderm development	3.96825	5.40541	2.51256	2.01005	8.62069	6.89655	2.88352	3.94082	4.31105	5.89176	82.0728	75.1709	38.4319	39.2899	5	4	123	72	199	58	14116
	GO:0009790~embryonic development	15.873	13.5135	3.52113	1.76056	7.14286	3.57143	4.04099	3.45168	3.57201	3.05109	0.000681185	3.49434	0.00356566	7.53108	20	10	123	72	568	280	14116
	GO:0009792~embryonic development ending in birth or egg hatching	9.52381	6.75676	3.59281	1.49701	7.36196		4.12327	2.93496	3.68158		0.259819	78.8628	0.620017		12	5	123	72	334	163	14116
	GO:0010769~regulation of cell morphogenesis involved in differentiation	4.7619	5.40541	7.79221	5.19481	12.2449	8.16327	8.94267	10.1847	6.12344	6.97392	0.9263	11.0069	4.57432	27.3081	6	4	123	72	77	49	14116
	GO:0010770~positive regulation of cell morphogenesis involved in differentiation	2.38095	2.7027	42.8571	28.5714	50	33.3333	49.1847	56.0159	25.0041	28.4769	2.60225	45.1254	9.24934	69.4127	3	2	123	72	7	6	14116
	GO:0017145~stem cell division	1.5873	2.7027			50	50			25.0041	42.7153			75.2515	54.5971	2	2	123	72		4	14116
	GO:0030154~cell differentiation	42.0635	50	3.23763	2.26023	7.39191	5.16039	3.71564	4.43131	3.69656	4.40855	4.3338e-15	9.4369e-13	2.83274e-15	7.54952e-13	53	37	123	72	1637	717	14116
	GO:0045165~cell fate commitment	7.14286	6.75676	6.47482	3.59712	16.6667	9.25926	7.43078	7.05236	8.33469	7.91024	0.0471526	8.56536	0.0160715	5.5235	9	5	123	72	139	54	14116
	GO:0045595~regulation of cell differentiation	26.9841	29.7297	6.91057	4.47154	13.9918	9.0535	7.93086	8.76671	6.99702	7.73445	1.69175e-17	2.94431e-11	2.86807e-16	2.29861e-10	34	22	123	72	492	243	14116
	GO:0045596~negative regulation of cell differentiation	12.6984	13.5135	7.40741	4.62963	14.2857	8.92857	8.50105	9.07665	7.14402	7.62773	9.18939e-07	0.00216634	6.58871e-06	0.00784936	16	10	123	72	216	112	14116
	GO:0045597~positive regulation of cell differentiation	14.2857	17.5676	7.86026	5.67686	16.9811	12.2642	9.02077	11.1298	8.49195	10.4773	2.03987e-08	2.33154e-06	2.86348e-08	3.40822e-06	18	13	123	72	229	106	14116
	GO:0045995~regulation of embryonic development	2.38095	2.7027	23.0769	15.3846	42.8571	28.5714	26.4841	30.1624	21.4321	24.4087	9.04935	67.2001	12.5639	74.8956	3	2	123	72	13	7	14116
	GO:0048562~embryonic organ morphogenesis	3.1746				8.88889				4.44517				65.4287		4		123	72		45	14116
	GO:0048568~embryonic organ development	6.34921		4.65116		11.9403		5.33787		5.97112		1.26413		0.572788		8		123	72	172	67	14116
	GO:0048598~embryonic morphogenesis	5.55556		2.28013		4.79452		2.61677		2.39765		59.2997		71.4565		7		123	72	307	146	14116
	GO:0051093~negative regulation of developmental process	16.6667	17.5676	8.10811	5.01931	16.0305	9.92366	9.30521	9.84063	8.01657	8.47784	1.24556e-10	9.40362e-06	1.01835e-09	3.92321e-05	21	13	123	72	259	131	14116
	GO:0051094~positive regulation of developmental process	17.4603	20.2703	7.91367	5.39568	16.9231	11.5385	9.08206	10.5785	8.46291	9.85737	4.29434e-11	1.42793e-07	7.85261e-11	2.58067e-07	22	15	123	72	278	130	14116
	GO:0008593~regulation of Notch signaling pathway	2.38095	2.7027			37.5	25			18.753	21.3576			16.2155	79.3964	3	2	123	72		8	14116
	GO:0017015~regulation of transforming growth factor beta receptor signaling pathway	3.1746		10.2564		17.3913		11.7707		8.69707		7.69936		16.1975		4		123	72	39	23	14116
	GO:0030509~BMP signaling pathway	4.7619	4.05405	13.6364	6.81818	19.3548	9.67742	15.6497	13.3674	9.67899	8.26747	0.0641471	29.7933	0.552214	57.6302	6	3	123	72	44	31	14116
	GO:0030949~positive regulation of vascular endothelial growth factor receptor signaling pathway	1.5873	2.7027			50	33.3333			25.0041	28.4769			75.2515	69.4127	2	2	123	72		4	14116
	GO:0032909~regulation of transforming growth factor-beta2 production	1.5873	2.7027			66.6667	50			33.3388	42.7153			64.9087	54.5971	2	2	123	72		3	14116
	GO:0032925~regulation of activin receptor signaling pathway	2.38095	2.7027			42.8571	28.5714			21.4321	24.4087			12.5639	74.8956	3	2	123	72		7	14116
	GO:0006928~cell motion	19.0476	28.3784	5.05263	4.42105	11.0092	9.63303	5.79861	8.66772	5.50548	8.22955	2.5332e-08	1.82487e-10	4.46123e-08	3.18556e-10	24	21	123	72	475	218	14116
	GO:0008283~cell proliferation	10.3175	13.5135	2.98165	2.29358	5.8296	4.4843	3.42187	4.49669	2.91527	3.83097	0.678065	0.544802	2.52424	1.63212	13	10	123	72	436	223	14116
	GO:0008284~positive regulation of cell proliferation	18.254	22.973	5.55556	4.10628	11.2745	8.33333	6.37579	8.05059	5.63817	7.11921	1.21324e-08	2.79271e-07	8.29384e-08	1.29755e-06	23	17	123	72	414	204	14116
	GO:0008285~negative regulation of cell proliferation	15.873	17.5676	5.54017	3.60111	11.1111	7.22222	6.35813	7.06017	5.55646	6.16998	4.52485e-07	0.000365089	2.91535e-06	0.00131901	20	13	123	72	361	180	14116
	GO:0042127~regulation of cell proliferation	34.127	37.8378	5.46379	3.55781	10.8861	7.08861	6.27047	6.97529	5.44392	6.05584	1.67497e-19	3.77476e-13	1.41904e-17	9.81437e-12	43	28	123	72	787	395	14116
	GO:0051129~negative regulation of cellular component organization					10.4651	5.81395			5.23341	4.96689			0.481638	25.2993	9	5	123	72		86	14116
	GO:0051130~positive regulation of cellular component organization	7.14286	8.10811	4.97238	3.31492	9.18367	6.12245	5.70651	6.49908	4.59258	5.23044	0.302356	3.60168	1.16803	8.57413	9	6	123	72	181	98	14116
	GO:0051270~regulation of cell motion	20.6349	27.027	13.4715	10.3627	24.5283	18.8679	15.4605	20.3166	12.2661	16.119	1.79724e-19	1.19112e-16	1.23108e-17	3.99807e-15	26	20	123	72	193	106	14116
	GO:0051271~negative regulation of cell motion	7.14286	8.10811	14.2857	9.52381	26.4706	17.6471	16.3949	18.672	13.2374	15.076	0.000112031	0.0265799	0.000390811	0.064784	9	6	123	72	63	34	14116
	GO:0051272~positive regulation of cell motion	12.6984	17.5676	16.3265	13.2653	29.6296	24.0741	18.737	26.0074	14.8172	20.5666	8.12683e-12	9.73777e-11	9.49685e-11	8.46778e-10	16	13	123	72	98	54	14116
KEGG	hsa03022:Basal transcription factors	3.1746		11.4286		20		7.00172		5.39759		18.0902		31.5473		4		83	59	35	20	5085	2240
	hsa04060:Cytokine-cytokine receptor interaction	14.2857	24.3243	6.87023	6.87023	26.4706	26.4706	4.20905	5.92121	7.14387	10.0499	0.000645227	2.36029e-06	7.84893e-08	1.59717e-10	18	18	83	59	262	68	5085
	hsa04510:Focal adhesion	11.1111	17.5676	6.96517	6.46766	11.1111	10.3175	4.26722	5.57425	2.99866	3.91714	0.0169664	0.00199239	0.524098	0.0610416	14	13	83	59	201	126	5085
	hsa04512:ECM-receptor interaction	7.14286	12.1622	10.7143	10.7143	20	20	6.56411	9.23426	5.39759	7.59322	0.0566384	0.00410301	0.177097	0.0133499	9	9	83	59	84	45	5085
	hsa04520:Adherens junction	5.55556	6.75676	9.09091	6.49351	12.2807	8.77193	5.56955	5.59652	3.31431	3.33036	1.49764	11.153	16.3201	46.7256	7	5	83	59	77	57	5085
	hsa04810:Regulation of actin cytoskeleton		9.45946				6.08696				2.31098				55.5269		7	83	59		115	5085
	hsa04320:Dorso-ventral axis formation	3.96825	4.05405			35.7143	21.4286			9.63855	8.13559			1.35887	41.3027	5	3	83	59		14	5085
	hsa04010:MAPK signaling pathway	7.93651	10.8108	3.74532	2.99625	6.75676	5.40541	2.29457	2.58237	1.82351	2.05222	25.6333	28.238	62.968	60.5179	10	8	83	59	267	148	5085
	hsa04350:TGF-beta signaling pathway	11.1111	9.45946	16.092	8.04598	22.9508	11.4754	9.85875	6.93454	6.19396	4.35677	7.99809e-07	0.441658	0.000139757	4.42165	14	7	83	59	87	61	5085
	hsa04110:Cell cycle	4.7619		4.8				2.94072				42.8627				6		83	59	125		5085
	hsa05200:Pathways in cancer	23.0159	25.6757	8.84146	5.79268	14.7959	9.69388	5.41673	4.99251	3.99312	3.68039	4.5941e-11	1.04619e-05	4.28368e-08	0.000867083	29	19	83	59	328	196	5085

## Sheet: E) Hubs
Term		%				% (hESC)	% (hESC)	% (hESC)	% (hESC)	% (human)	% (human)	% (human)	% (human)	Fold Enrichment (hESC)	Fold Enrichment (hESC)	Fold Enrichment (hESC)	Fold Enrichment (hESC)	Fold Enrichment (human)	Fold Enrichment (human)	Fold Enrichment (human)	Fold Enrichment (human)	FDR (hESC)	FDR (hESC)	FDR (hESC)	FDR (hESC)	FDR (human)	FDR (human)	FDR (human)	FDR (human)	Count				List Total	List Total (human)	List Total (human)	List Total (human)	Pop Hits (hESC)	Pop Hits (human)	Pop Total (hESC)	Pop Total (human)
		ALL_EC+TF	ALL_EC	C+S_EC+TF	C+S_EC	ALL_EC+TF	ALL_EC	C+S_EC+TF	C+S_EC	ALL_EC+TF	ALL_EC	C+S_EC+TF	C+S_EC	ALL_EC+TF	ALL_EC	C+S_EC+TF	C+S_EC	ALL_EC+TF	ALL_EC	C+S_EC+TF	C+S_EC	ALL_EC+TF	ALL_EC	C+S_EC+TF	C+S_EC	ALL_EC+TF	ALL_EC	C+S_EC+TF	C+S_EC	ALL_EC+TF	ALL_EC	C+S_EC+TF	C+S_EC	ALL_EC+TF	ALL_EC	C+S_EC+TF	C+S_EC
GO	GO:0006350~transcription	69.7842		59.5238		9.22931		2.37869		4.61685		1.18991		4.08413		3.48364		4.68859		3.99923		3.22154e-40		3.92718e-06		7.5933e-45		2.35023e-07		97		25		139	29	42	13	1051	2101	6151	14116
	GO:0010467~gene expression	72.6619		61.9048		6.4578		1.6624		3.36779		0.866956		2.85769		2.43463		3.42012		2.9138		1.90452e-28		0.00243303		5.19774e-35		6.41554e-05		101		26						1564	2999
	GO:0010468~regulation of gene expression	79.8561		73.8095		7.87234		2.19858		3.88655		1.08543		3.48365		3.21988		3.94695		3.64809		3.98441e-43		1.76675e-08		4.62241e-48		6.54932e-10		111		31						1410	2856
	GO:0010628~positive regulation of gene expression	43.1655		35.7143		21.5054		5.37634		10.327		2.58176		9.51652		7.87378		10.4875		8.67716		5.10776e-41		2.18256e-06		4.63698e-42		7.15029e-07		60		15						279	581
	GO:0010629~negative regulation of gene expression	22.3022		28.5714		11.2319		4.34783		6.15079		2.38095		4.97031		6.36749		6.24637		8.00227		3.48055e-10		0.00191013		1.54321e-12		0.000213148		31		12						276	504
	GO:0016481~negative regulation of transcription	21.5827		26.1905		12.2951		4.5082		6.53595		2.39651		5.44079		6.60236		6.63751		8.05457		9.10605e-11		0.0050238		1.15463e-12		0.000898187		30		11						244	459
	GO:0045449~regulation of transcription	78.4173		73.8095		8.64393		2.45837		4.1907		1.19185		3.8251		3.60034		4.25582		4.00575		6.32249e-46		8.26927e-10		6.98398e-50		4.93716e-11		109		31						1261	2601
	GO:0045941~positive regulation of transcription	43.1655		35.7143		21.8978		5.47445		10.6383		2.65957		9.69017		8.01747		10.8036		8.9387		1.65004e-41		1.72028e-06		8.07429e-43		4.84537e-07		60		15						274	564
	GO:0003001~generation of a signal involved in cell-cell signaling	2.8777				14.8148								6.55582								31.8301								4								27
	GO:0007044~cell-substrate junction assembly	2.8777	13.7931	4.7619	15.3846	26.6667	26.6667	13.3333	13.3333	17.3913	17.3913	8.69565	8.69565	11.8005	56.5609	19.527	63.0872	17.6616	84.6537	29.2257	94.4214	6.93199	0.0612432	80.9955	37.0143	2.4102	0.0199205	66.9437	26.5509	4	4	2	2					15	23
	GO:0007154~cell communication	12.2302	24.1379			5.88235	2.42215			2.13836	0.880503			2.60305	5.13745			2.17159	4.28592			1.19255	2.61393			7.91514	6.49926			17	7							289	795
	GO:0007155~cell adhesion	10.0719	41.3793	14.2857	46.1538	4.63576	3.97351	1.98675	1.98675	2	1.71429	0.857143	0.857143	2.05141	8.42795	2.90965	9.40041	2.03108	8.34443	2.88082	9.30725	26.447	5.60033e-05	56.1757	0.258736	29.0713	6.75015e-05	57.745	0.275348	14	12	6	6					302	700
	GO:0007267~cell-cell signaling	7.19424	13.7931			4.92611	1.97044							2.17989	4.17938							49.2206	66.1054							10	4							203
	GO:0010646~regulation of cell communication	17.9856	37.931	19.0476	38.4615	4.78927	2.10728	1.53257	0.957854	2.40848	1.05973	0.770713	0.481696	2.11934	4.46961	2.24448	4.53212	2.4459	5.15833	2.59033	5.23047	0.869332	0.0945838	60.5125	20.7221	0.1103	0.028205	37.8667	13.1706	25	11	8	5					522	1038
	GO:0010647~positive regulation of cell communication	7.91367	20.6897	9.52381	30.7692	6.79012	3.7037	2.46914	2.46914	3.34347	1.82371	1.21581	1.21581	3.00475	7.85568	3.61611	11.6828	3.39542	8.87706	4.08626	13.2018	5.6145	1.17769	79.8951	5.09482	2.51457	0.694781	69.8028	3.65672	11	6	4	4					162	329
	GO:0010648~negative regulation of cell communication	5.03597				5.46875				2.82258				2.42002				2.86644				70.1825				46.1542				7								128	248
	GO:0016337~cell-cell adhesion	4.31655	17.2414			5.50459	4.58716							2.43588	9.72952							83.1991	2.25075							6	5							109
	GO:0022407~regulation of cell-cell adhesion	2.15827	6.89655	7.14286	15.3846	20	13.3333	20	13.3333	13.6364	9.09091	13.6364	9.09091	8.85036	28.2805	29.2905	63.0872	13.8483	44.2508	45.8312	98.7133	53.7069	67.7744	6.89026	37.0143	28.7114	51.4462	2.9872	25.558	3	2	3	2					15	22
	GO:0022409~positive regulation of cell-cell adhesion			4.7619				28.5714				18.1818				41.8435				61.1082				53.9015				41.0917				2						7	11
	GO:0022610~biological adhesion	10.0719	41.3793	14.2857	46.1538	4.63576	3.97351	1.98675	1.98675	1.99715	1.71184	0.85592	0.85592	2.05141	8.42795	2.90965	9.40041	2.02818	8.33253	2.87671	9.29398	26.447	5.60033e-05	56.1757	0.258736	29.3297	6.84987e-05	57.9339	0.277205	14	12	6	6					302	701
	GO:0030036~actin cytoskeleton organization		13.7931				3.1746								6.73344								27.0814								4							126
	GO:0030155~regulation of cell adhesion	5.03597	17.2414	14.2857	30.7692	10.9375	7.8125	9.375	6.25	5.10949	3.64964	4.37956	2.91971	4.84004	16.5706	13.7299	29.5721	5.18889	17.7649	14.7195	31.7035	4.99977	0.298667	0.0965792	0.34793	3.85409	0.239518	0.074856	0.290495	7	5	6	4					64	137
	GO:0034329~cell junction assembly	3.59712	13.7931	7.14286	15.3846	21.7391	17.3913	13.0435	8.69565			7.31707	4.87805	9.61996	36.8876	19.1025	41.1438			24.5923	52.9681	2.64533	0.232442	15.3635	50.7994			9.89553	42.3294	5	4	3	2					23	41
	GO:0034330~cell junction organization	5.7554	20.6897	14.2857	30.7692	24.2424	18.1818	18.1818	12.1212	14.0351	10.5263	10.5263	7.01754	10.7277	38.5643	26.6277	57.352	14.2532	51.2377	35.3784	76.1997	0.0112016	0.000482162	0.00350016	0.0472112	0.00223911	0.000135772	0.000995068	0.021095	8	6	6	4					33	57
	GO:0043062~extracellular structure organization	3.59712	10.3448				3.65854			3.06748	1.84049				7.75988			3.11515	8.95875				59.3925			74.6092	50.0864			5	3							82	163
	GO:0045216~cell-cell junction organization	2.8777	6.89655	9.52381	15.3846	21.0526	10.5263	21.0526	10.5263			11.4286	5.71429	9.31617	22.3267	30.8321	49.8057			38.4109	62.0484	13.3757	76.1849	0.408216	44.3297			0.230466	37.4856	4	2	4	2					19	35
	GO:0000904~cell morphogenesis involved in differentiation	6.47482	20.6897		23.0769	7.9646	5.30973		2.65487	3.68852	2.45902		1.22951	3.52448	11.2621		12.5616	3.74584	11.9695		13.3506	6.2433	0.221703		26.7781	4.65955	0.173655		24.3172	9	6		3					113	244
	GO:0001701~in utero embryonic development	9.35252				13.5417				7.38636				5.99243				7.50114				0.00218386				0.000262543				13								96	176
	GO:0001704~formation of primary germ layer	2.8777				16.6667				10				7.3753				10.1554				24.234				11.3915				4								24	40
	GO:0001707~mesoderm formation	2.15827				13.0435				8.33333				5.77197				8.46283				81.6931				57.581				3								23	36
	GO:0001708~cell fate specification	2.8777	6.89655			25	12.5			7.84314	3.92157			11.0629	26.5129			7.96502	19.0886			8.3339	70.1206			21.0729	81.2993			4	2							16	51
	GO:0001756~somitogenesis	2.8777				23.5294				11.7647				10.4122				11.9475				9.87727				7.34971				4								17	34
	GO:0001824~blastocyst development	2.8777				13.3333				9.30233				5.90024				9.44688				39.8597				13.7577				4								30	43
	GO:0001892~embryonic placenta development	2.8777				25				16.6667				11.0629				16.9257				8.3339				2.73071				4								16	24
	GO:0007275~multicellular organismal development	46.0432	72.4138	59.5238	76.9231	5.10367	1.67464	1.99362	0.797448	2.23386	0.732984	0.8726	0.34904	2.25846	3.55197	2.9197	3.77316	2.26857	3.56786	2.93277	3.79004	2.16096e-08	1.2789e-05	0.000147879	0.112782	2.51932e-08	1.24661e-05	0.000144672	0.109844	64	21	25	10					1254	2865
	GO:0007369~gastrulation	4.31655				14.2857				8.57143				6.32169				8.70462				3.93463				1.04407				6								42	70
	GO:0007398~ectoderm development	4.31655				10.3448				3.01508				4.57777				3.06193				15.0498				55.6994				6								58	199
	GO:0007498~mesoderm development	3.59712				12.8205				6.75676				5.67331				6.86175				17.2821				9.8213				5								39	74
	GO:0009790~embryonic development	20.8633	24.1379	19.0476	23.0769	10.3571	2.5	2.85714		5.10563	1.23239	1.40845	0.528169	4.58322	5.30259	4.18435		5.18497	5.99879	4.73374	5.7351	1.98101e-08	2.22424	3.62027		1.73469e-09	1.20004	1.84224	73.9084	29	7	8	3					280	568
	GO:0009792~embryonic development ending in birth or egg hatching	13.6691				11.6564				5.68862				5.15819				5.77702				2.93588e-05				7.31795e-06				19								163	334
	GO:0009952~anterior/posterior pattern formation	6.47482				16.9811				6.42857				7.51446				6.52847				0.0344319				0.119489				9								53	140
	GO:0009953~dorsal/ventral pattern formation	2.8777	6.89655			19.0476	9.52381							8.42891	20.2003							17.3879	79.5287							4	2							21
	GO:0010769~regulation of cell morphogenesis involved in differentiation	5.03597	10.3448	9.52381	15.3846	14.2857	6.12245	8.16327	4.08163	9.09091	3.8961	5.19481	2.5974	6.32169	12.9859	11.9553	19.3124	9.23218	18.9646	17.4595	28.2038	1.24975	29.1054	6.55901	78.0029	0.182352	15.4856	2.34336	64.479	7	3	4	2					49	77
	GO:0010770~positive regulation of cell morphogenesis involved in differentiation	3.59712	6.89655	7.14286	15.3846	83.3333	33.3333	50	33.3333	71.4286	28.5714	42.8571	28.5714	36.8765	70.7011	73.2262	157.718	72.5385	139.074	144.041	310.242	0.00610827	36.4047	1.05187	16.8704	0.000519934	20.5278	0.282781	8.95911	5	2	3	2					6	7
	GO:0019827~stem cell maintenance	2.15827				18.75				12				8.29721				12.1865				58.1049				35.1054				3								16	25
	GO:0030154~cell differentiation	36.6906	68.9655	45.2381	69.2308	7.11297	2.7894	2.64993	1.25523	3.11546	1.22175	1.16066	0.549786	3.14762	5.91641	3.88089	5.93917	3.16387	5.94696	3.90092	5.96983	4.26437e-11	6.06707e-09	0.000317059	0.0166766	5.90417e-11	6.14927e-09	0.000315876	0.0163162	51	20	19	9					717	1637
	GO:0030326~embryonic limb morphogenesis	3.59712				11.9048				5.74713				5.26807				5.83643				21.7787				16.6323				5								42	87
	GO:0035113~embryonic appendage morphogenesis	3.59712				11.9048				5.74713				5.26807				5.83643				21.7787				16.6323				5								42	87
	GO:0035116~embryonic hindlimb morphogenesis	2.15827				37.5								16.5944								20.0665								3								8
	GO:0045165~cell fate commitment	9.35252	13.7931	7.14286		24.0741	7.40741	5.55556		9.35252	2.8777	2.15827		10.6532	15.7114	8.13624		9.49785	14.0074	7.25385		2.68114e-06	2.92445	57.0918		1.8942e-05	4.1418	64.9949		13	4	3						54	139
	GO:0045595~regulation of cell differentiation	21.5827	34.4828	23.8095	23.0769	12.3457	4.11523	4.11523	1.23457	6.09756	2.03252	2.03252	0.609756	5.46319	8.72854	6.02685	5.84141	6.19231	9.89347	6.8312	6.62101	8.16125e-11	0.00119555	0.0386423	72.6928	6.56142e-12	0.000445946	0.0151059	64.4551	30	10	10	3					243	492
	GO:0045596~negative regulation of cell differentiation	11.5108	13.7931	16.6667		14.2857	3.57143	6.25		7.40741	1.85185	3.24074		6.32169	7.57512	9.15327		7.52252	9.01405	10.892		3.65232e-05	20.5556	0.140856		5.22742e-06	13.493	0.0569071		16	4	7						112	216
	GO:0045597~positive regulation of cell differentiation	10.0719	13.7931	11.9048		13.2075	3.77358	4.71698		6.11354	1.74672	2.18341		5.84458	8.0039	6.90813		6.20854	8.50233	7.33832		0.000962702	17.9756	8.21302		0.00065662	15.6378	6.82856		14	4	5						106	229
	GO:0048332~mesoderm morphogenesis	2.15827				13.0435				7.89474				5.77197				8.01742				81.6931				61.2268				3								23	38
	GO:0048339~paraxial mesoderm development	2.15827				33.3333								14.7506								24.7427								3								9
	GO:0048340~paraxial mesoderm morphogenesis	2.15827				50								22.1259								11.5929								3								6
	GO:0048562~embryonic organ morphogenesis	3.59712				11.1111								4.91687								26.7412								5								45
	GO:0048568~embryonic organ development	6.47482		7.14286		13.4328		4.47761		5.23256		1.74419		5.94427		6.55757		5.31387		5.86213		0.194397		71.4684		0.495394		78.5504		9		3						67	172
	GO:0048598~embryonic morphogenesis	10.7914				10.274				4.88599				4.54642				4.96192				0.00706127				0.0032011				15								146	307
	GO:0048863~stem cell differentiation	2.15827				17.6471								7.80914								62.2708								3								17
	GO:0048864~stem cell development	2.15827				17.6471				11.5385				7.80914				11.7178				62.2708				37.245				3								17	26
	GO:0051093~negative regulation of developmental process	12.9496	13.7931	19.0476		13.7405	3.05344	6.10687		6.94981	1.5444	3.0888		6.0804	6.47644	8.94366		7.0578	7.51751	10.3813		6.3808e-06	29.5525	0.0344083		1.03126e-06	21.1269	0.0140796		18	4	8						131	259
	GO:0051094~positive regulation of developmental process	10.7914	13.7931	14.2857		11.5385	3.07692	4.61538		5.39568	1.43885	2.15827		5.10598	6.52626	6.75934		5.47953	7.00372	7.25385		0.00174035	29.0534	2.595		0.000983098	24.9409	1.9638		15	4	6						130	278
	GO:0016055~Wnt receptor signaling pathway	4.31655				8.21918				4.51128				3.63713				4.58138				33.8326				15.7953				6								73	133
	GO:0017015~regulation of transforming growth factor beta receptor signaling pathway	2.8777				17.3913				10.2564				7.69596				10.4158				21.8541				10.6528				4								23	39
	GO:0030949~positive regulation of vascular endothelial growth factor receptor signaling pathway	1.43885				50								22.1259								79.3548								2								4
	GO:0032909~regulation of transforming growth factor-beta2 production	2.15827		4.7619		100		66.6667				50		44.2518		97.6349				168.048		2.53633		28.235				17.501		3		2						3	4
	GO:0006928~cell motion	12.2302	51.7241	19.0476	53.8462	7.79817	6.88073	3.66972	3.21101	3.57895	3.15789	1.68421	1.47368	3.45083	14.5943	5.3744	15.193	3.63456	15.3713	5.66055	16.0019	0.0446794	1.39277e-10	0.844543	0.00225516	0.0279638	8.5143e-11	0.641812	0.00172459	17	15	8	7					218	475
	GO:0008283~cell proliferation	14.3885	31.0345	16.6667	38.4615	8.96861	4.03587	3.13901	2.24215	4.58716	2.06422	1.6055	1.14679	3.96877	8.56023	4.59716	10.6088	4.65844	10.0478	5.39602	12.4524	0.000758701	0.00722094	5.31125	1.03794	8.22133e-05	0.00231706	2.46377	0.573495	20	9	7	5					223	436
	GO:0008284~positive regulation of cell proliferation	17.2662	41.3793	23.8095	38.4615	11.7647	5.88235	4.90196	2.45098	5.7971	2.89855	2.41546	1.20773	5.20609	12.4767	7.17904	11.5969	5.88719	14.1089	8.11824	13.1141	1.55916e-07	8.84391e-07	0.009375	0.74087	2.18407e-08	2.74199e-07	0.0037064	0.47085	24	12	10	5					204	414
	GO:0008285~negative regulation of cell proliferation	9.35252		14.2857		7.22222		3.33333		3.60111		1.66205		3.19596		4.88175		3.65707		5.58607		1.15515		10.184		0.382069		6.01089		13		6						180	361
	GO:0042127~regulation of cell proliferation	26.6187	44.8276	35.7143	46.1538	9.36709	3.29114	3.79747	1.51899	4.7014	1.65184	1.90597	0.762389	4.14511	6.98062	5.56148	7.18715	4.77446	8.04049	6.40588	8.27837	2.04903e-10	8.18779e-05	0.000190163	0.907891	5.01821e-12	1.82394e-05	3.55729e-05	0.476809	37	13	15	6					395	787
	GO:0051129~negative regulation of cellular component organization			7.14286			3.48837					2.11268			7.39896					7.1006			62.5947					66.4155			3	3						86	142
	GO:0051130~positive regulation of cellular component organization	8.63309	13.7931	9.52381	23.0769	12.2449	4.08163	4.08163	3.06122	6.62983	2.20994	2.20994	1.65746	5.41859	8.65728	5.97765	14.4843	6.73286	10.7571	7.42752	17.9975	0.0178861	14.7744	36.4058	21.1306	0.00277053	8.5087	22.719	14.5389	12	4	4	3					98	181
	GO:0051270~regulation of cell motion	10.7914	37.931	21.4286	46.1538	14.1509	10.3774	8.49057	5.66038	7.77202	5.69948	4.66321	3.10881	6.26205	22.0107	12.4346	26.7823	7.89279	27.7427	15.6728	33.7569	0.000133241	2.51753e-08	0.000587974	0.00156827	1.03382e-05	3.16528e-09	0.000113389	0.000523973	15	11	9	6					106	193
	GO:0051271~negative regulation of cell motion	2.8777	10.3448	7.14286	15.3846	11.7647	8.82353	8.82353	5.88235	6.34921	4.7619	4.7619	3.1746	5.20609	18.715	12.9223	27.8326	6.44787	23.179	16.0045	34.4713	50.6731	15.6525	29.898	64.986	34.0925	10.7785	21.2877	57.1058	4	3	3	2					34	63
	GO:0051272~positive regulation of cell motion	7.91367	27.5862	16.6667	38.4615	20.3704	14.8148	12.963	9.25926	11.2245	8.16327	7.14286	5.10204	9.01426	31.4227	18.9846	43.8105	11.3989	39.7354	24.0068	55.4003	0.000417906	4.56898e-06	0.00202256	0.00393054	6.72829e-05	1.08651e-06	0.000586018	0.00163314	11	8	7	5					54	98
KEGG	hsa03022:Basal transcription factors	12.2302		9.52381		85		20		48.5714		11.4286		21.1556		15.4483		27.4429		20.0394		4.40289e-17		1.70226		6.24195e-17		0.858975		17		4		90	26	29	13	20	35	2240	5085
	hsa04060:Cytokine-cytokine receptor interaction	5.7554	27.5862	11.9048	38.4615	11.7647	11.7647	7.35294	7.35294		3.05344	1.9084	1.9084	2.9281	10.1357	5.67951	12.6697		5.97181	3.34628	7.46477	16.4071	0.00524375	8.73585	0.297645		0.185533	41.8653	2.26084	8	8	5	5					68	262
	hsa04510:Focal adhesion	12.9496	48.2759	21.4286	61.5385	14.2857	11.1111	7.14286	6.34921	8.95522	6.96517	4.47761	3.9801	3.55556	9.57265	5.51724	10.9402	5.0597	13.6223	7.85126	15.5683	0.00502125	8.67804e-08	0.0953581	0.00088135	4.70472e-05	1.29839e-09	0.00807688	8.47174e-05	18	14	9	8					126	201
	hsa04512:ECM-receptor interaction	5.7554	27.5862	11.9048	38.4615	17.7778	17.7778	11.1111	11.1111	9.52381	9.52381	5.95238	5.95238	4.42469	15.3162	8.58238	19.1453	5.38095	18.6264	10.4372	23.283	1.73383	0.00028952	2.01114	0.058279	0.643225	9.53515e-05	1.03474	0.0288625	8	8	5	5					45	84
	hsa04514:Cell adhesion molecules (CAMs)		13.7931				7.14286								6.15385								20.2026								4							56
	hsa04520:Adherens junction	10.0719	17.2414	9.52381	23.0769	24.5614	8.77193	7.01754	5.26316	18.1818	6.49351	5.19481	3.8961	6.11306	7.55735	5.42045	9.06883	10.2727	12.6998	9.10882	15.2398	0.000160038	3.05408	28.0151	28.6719	4.68072e-07	0.466283	7.95847	11.915	14	5	4	3					57	77
	hsa04810:Regulation of actin cytoskeleton	6.47482	27.5862	11.9048	38.4615	7.82609	6.95652	4.34783	4.34783			2.32558	2.32558	1.94783	5.99331	3.35832	7.49164			4.07779	9.0966	60.3183	0.168463	41.1215	2.1831			25.0562	1.08973	9	8	5	5					115	215
	hsa04010:MAPK signaling pathway	7.19424		11.9048						3.74532		1.87266						2.1161		3.28361						37.3165		43.7467		10		5							267
	hsa04310:Wnt signaling pathway	11.5108				17.2043				10.596				4.28196				5.98675				0.00200595				3.78144e-05				16								93	151
	hsa04330:Notch signaling pathway	2.8777				18.1818				8.51064				4.52525				4.80851				44.8706				41.1911				4								22	47
	hsa04350:TGF-beta signaling pathway	9.35252		16.6667		21.3115		11.4754		14.9425		8.04598		5.30419		8.86376		8.44253		14.1082		0.00277354		0.074421		2.53126e-05		0.00582113		13		7						61	87
	hsa04722:Neurotrophin signaling pathway	5.7554				10.8108								2.69069								24.0921								8								74
	hsa04110:Cell cycle	14.3885		16.6667		24.0964		8.43373		16		5.6		5.99732		6.51433		9.04		9.81931		1.26115e-07		0.418141		1.91058e-10		0.0468748		20		7						83	125
	hsa05200:Pathways in cancer	29.4964	41.3793	33.3333	69.2308	20.9184	6.12245	7.14286	4.59184	12.5	3.65854	4.26829	2.7439	5.20635	5.27473	5.51724	7.91209	7.0625	7.15525	7.48423	10.7329	8.77472e-18	0.00252846	0.000137152	0.00101615	4.65392e-22	0.000129788	4.0701e-06	0.000101156	41	12	14	9					196	328

## Sheet: F) Bottlenecks
Term		%				% (hESC)	% (hESC)	% (hESC)	% (hESC)	% (human)	% (human)	% (human)	% (human)	Fold Enrichment (hESC)	Fold Enrichment (hESC)	Fold Enrichment (hESC)	Fold Enrichment (hESC)	Fold Enrichment (human)	Fold Enrichment (human)	Fold Enrichment (human)	Fold Enrichment (human)	FDR (hESC)	FDR (hESC)	FDR (hESC)	FDR (hESC)	FDR (human)	FDR (human)	FDR (human)	FDR (human)	Count				List Total	List Total (human)	List Total (human)	List Total (human)	Pop Hits (hESC)	Pop Hits (human)	Pop Total (hESC)	Pop Total (human)
		ALL_EC+TF	ALL_EC	C+S_EC+TF	C+S_EC	ALL_EC+TF	ALL_EC	C+S_EC+TF	C+S_EC	ALL_EC+TF	ALL_EC	C+S_EC+TF	C+S_EC	ALL_EC+TF	ALL_EC	C+S_EC+TF	C+S_EC	ALL_EC+TF	ALL_EC	C+S_EC+TF	C+S_EC	ALL_EC+TF	ALL_EC	C+S_EC+TF	C+S_EC	ALL_EC+TF	ALL_EC	C+S_EC+TF	C+S_EC	ALL_EC+TF	ALL_EC	C+S_EC+TF	C+S_EC	ALL_EC+TF	ALL_EC	C+S_EC+TF	C+S_EC
GO	GO:0006350~transcription	44.7761		39.5833		2.85578		0.904331		5.70885		1.8078		3.00838		2.65949		2.62053		2.31662		5.88418e-13		0.120894		1.79967e-10		0.702998		60		19		134	63	48	27	2101	1051	14116	6151
	GO:0010467~gene expression	48.5075		41.6667		2.16739		0.666889		4.15601		1.27877		2.2832		1.96121		1.90773		1.63869		7.89948e-09		3.66913		1.77002e-05		24.9235		65		20		134				2999	1564
	GO:0010468~regulation of gene expression	61.194		56.25		2.87115		0.945378		5.8156		1.91489		3.02456		2.7802		2.66954		2.45386		1.43396e-21		0.000194859		3.43976e-18		0.00242332		82		27		134				2856	1410
	GO:0010628~positive regulation of gene expression	35.8209		35.4167		8.26162		2.92599		17.2043		6.09319		8.70306		8.60485		7.89729		7.80817		1.80004e-28		4.28375e-08		2.0862e-27		1.4941e-07		48		17		134				581	279
	GO:0010629~negative regulation of gene expression	19.403		22.9167		5.15873		2.18254		9.42029		3.98551		5.43438		6.41849		4.32419		5.10726		1.29168e-08		0.00818652		1.1112e-06		0.056162		26		11		134				504	276
	GO:0016481~negative regulation of transcription	18.6567		20.8333		5.44662		2.17865		10.2459		4.09836		5.73765		6.40704		4.70317		5.25188		1.18889e-08		0.0287588		4.70291e-07		0.128616		25		10		134				459	244
	GO:0045449~regulation of transcription	55.2239		52.0833		2.84506		0.961169		5.86836		1.98255		2.99708		2.82664		2.69375		2.54056		4.77937e-18		0.000701873		1.49025e-15		0.00497061		74		25		134				2601	1261
	GO:0045941~positive regulation of transcription	35.8209		35.4167		8.51064		3.01418		17.5182		6.20438		8.96539		8.86421		8.0414		7.95065		4.68154e-29		2.74495e-08		8.86349e-28		1.13739e-07		48		17						564	274
	GO:0001952~regulation of cell-matrix adhesion	2.98507	4.7619	6.25	7.40741			11.1111	7.40741	28.5714	21.4286	21.4286	14.2857			32.6759	38.727	13.1151	20.9218	27.4598	32.545			5.92215	55.7402	5.20256	13.5365	7.9614	62.1378	4	3	3	2	134				27	14
	GO:0003001~generation of a signal involved in cell-cell signaling	2.98507								14.8148								6.80044								29.74				4				134	63	48	27		27
	GO:0007044~cell-substrate junction assembly	2.23881	4.7619	4.16667	7.40741	13.0435	13.0435	8.69565	8.69565	20	20		13.3333	13.7404	29.2257	25.5725	45.4622	9.1806	19.527		30.3753	29.4812	7.5093	72.6154	50.0546	51.8441	15.3669		64.6784	3	3	2	2	134				23	15
	GO:0007154~cell communication	19.403	25.3968	20.8333	29.6296	3.27044	2.01258	1.25786	1.00629	8.99654	5.53633	3.46021	2.76817	3.44519	4.50945	3.69916	5.26103	4.12968	5.40539	4.43411	6.30629	0.000154494	0.00212459	1.79702	0.730655	2.9396e-06	0.000181343	0.466551	0.233469	26	16	10	8	134		48		795	289
	GO:0007155~cell adhesion	14.1791	25.3968	22.9167	37.037	2.71429	2.28571	1.57143	1.42857	6.29139	5.29801	3.64238	3.31126	2.85932	5.12145	4.62131	7.46878	2.88794	5.17271	4.66756	7.54354	0.174697	0.000421306	0.138706	0.00411142	0.135382	0.00032363	0.121006	0.00359137	19	16	11	10	134	63	48	27	700	302
	GO:0007267~cell-cell signaling	12.6866	17.4603	12.5	22.2222	2.83333	1.83333	1	1	8.37438	5.41872	2.95567	2.95567	2.98473	4.10783	2.94083	5.22815	3.84409	5.29056	3.78756	6.73344	0.289849	0.447476	56.5793	6.76284	0.0114689	0.0507481	27.1077	2.25249	17	11	6	6	134	63		27	600	203
	GO:0010646~regulation of cell communication	28.3582	39.6825	33.3333	40.7407	3.66089	2.40848	1.54143	1.05973	7.27969	4.78927	3.06513	2.10728	3.8565	5.39652	4.53308	5.54043	3.3416	4.676	3.92784	4.8007	1.23075e-09	5.37439e-09	0.0012147	0.0129443	5.75465e-08	9.06288e-08	0.00686345	0.0443038	38	25	16	11	134	63	48	27	1038	522
	GO:0010647~positive regulation of cell communication	12.6866	20.6349	16.6667	25.9259	5.16717	3.95137	2.43161	2.12766	10.4938	8.02469	4.93827	4.32099	5.44327	8.85357	7.15096	11.1237	4.81698	7.8349	6.32819	9.84385	0.000141406	2.75091e-05	0.166736	0.0388865	0.000561799	8.81192e-05	0.336895	0.0739803	17	13	8	7	134	63	48	27	329	162
	GO:0010648~negative regulation of cell communication	7.46269	7.93651	10.4167		4.03226	2.01613	2.01613		7.8125	3.90625	3.90625		4.24771	4.51741	5.9291		3.58617	3.81386	5.0057		0.995034	33.5147	14.4088		2.97563	50.0355	23.8281		10	5	5		134	63	48	27	248	128
	GO:0016337~cell-cell adhesion	5.22388	7.93651	8.33333	11.1111			1.44928	1.08696	6.42202	4.58716	3.66972	2.75229			4.26208	5.68277	2.9479	4.47867	4.7026	6.27013			67.1775	79.0415	41.7838	33.8314	57.9186	72.9338	7	5	4	3	134	63	48	27	276	109
	GO:0022407~regulation of cell-cell adhesion	2.98507	3.1746	8.33333	7.40741	18.1818	9.09091	18.1818	9.09091	26.6667		26.6667	13.3333	19.1533	20.3694	53.4697	47.5286	12.2408		34.1722	30.3753	1.93255	81.1374	0.0859462	48.5228	6.36443		0.300595	64.6784	4	2	4	2	134				22	15
	GO:0022409~positive regulation of cell-cell adhesion	2.23881		6.25				27.2727		42.8571		42.8571				80.2045		19.6727		54.9196				0.983229		14.8694		1.9578		3		3		134				11	7
	GO:0022610~biological adhesion	14.1791	25.3968	22.9167	37.037	2.71041	2.28245	1.56919	1.42653	6.29139	5.29801	3.64238	3.31126	2.85524	5.11415	4.61472	7.45813	2.88794	5.17271	4.66756	7.54354	0.177877	0.000429123	0.140367	0.0041602	0.135382	0.00032363	0.121006	0.00359137	19	16	11	10	134				701	302
	GO:0030036~actin cytoskeleton organization		7.93651								3.96825								3.8744								48.3159				5			134					126
	GO:0030155~regulation of cell adhesion	8.20896	12.6984	16.6667	18.5185	8.0292	5.83942	5.83942	3.64964	17.1875	12.5	12.5	7.8125	8.45822	13.084	17.1727	19.0808	7.88958	12.2044	16.0182	17.798	0.00115271	0.00377275	0.000533793	0.175788	0.00157813	0.00509773	0.000722198	0.219337	11	8	8	5	134	63	48	27	137	64
	GO:0030198~extracellular matrix organization	4.47761	7.93651			5.76923	4.80769			11.1111	9.25926			6.0775	10.7723			5.10033	9.04027			5.17818	1.90582			9.97436	3.43813			6	5			134	63	48	27	104	54
	GO:0034329~cell junction assembly	2.98507	4.7619	6.25	7.40741			7.31707	4.87805	17.3913	13.0435	13.0435	8.69565			21.5183	25.5032	7.98313	12.735	16.7147	19.81			12.958	71.0138	20.284	31.9013	19.885	79.7445	4	3	3	2	134	63	48	27	41	23
	GO:0034330~cell junction organization	5.22388	7.93651	12.5	14.8148	12.2807	8.77193	10.5263	7.01754	21.2121	15.1515	18.1818	12.1212	12.9369	19.6547	30.9561	36.6888	9.737	14.7932	23.2992	27.6139	0.0269892	0.192505	0.0020405	0.248295	0.110408	0.528266	0.00714577	0.548854	7	5	6	4	134	63	48	27	57	33
	GO:0043062~extracellular structure organization	5.97015	9.52381			4.90798	3.68098			9.7561	7.31707			5.17022	8.24774			4.47834	7.14402			1.55365	1.25707			3.23855	2.26303			8	6			134	63	48		163	82
	GO:0045216~cell-cell junction organization	2.98507		8.33333	7.40741			11.4286	5.71429	21.0526		21.0526	10.5263			33.6095	29.8751	9.66379		26.9781	23.9805			0.353902	65.2469	12.3421		0.625616	73.2495	4		4	2	134				35	19
	GO:0051893~regulation of focal adhesion formation	2.23881	3.1746	4.16667				25		60	40	40				73.5208		27.5418	39.054	51.2583				36.2538		7.56709	58.1928	47.6526		3	2	2		134				8	5
	GO:0051895~negative regulation of focal adhesion formation	1.49254	3.1746							66.6667	66.6667							30.602	65.0899							68.5941	40.7364			2	2			134		48			3
	GO:0000904~cell morphogenesis involved in differentiation	9.70149	15.873	12.5	22.2222	5.32787	4.09836	2.45902	2.45902	11.5044	8.84956	5.30973	5.30973	5.61255	9.18293	7.23156	12.8561	5.28087	8.64026	6.8042	12.0964	0.0057977	0.00186881	2.09943	0.118371	0.00862389	0.00267588	2.64568	0.151301	13	10	6	6	134		48		244	113
	GO:0001701~in utero embryonic development	9.70149				7.38636				13.5417				7.78104				6.21603				0.000177395				0.00149065				13				134		48		176	96
	GO:0001704~formation of primary germ layer	2.98507				10				16.6667				10.5343				7.6505				10.5022				22.5288				4				134		48		40	24
	GO:0001707~mesoderm formation	2.23881				8.33333				13.0435				8.77861				5.98735				55.7024				80.1105				3				134	63	48	27	36	23
	GO:0001708~cell fate specification	2.98507				7.84314				25				8.26222				11.4757				19.5596				7.66048				4				134	63	48	27	51	16
	GO:0001709~cell fate determination	2.98507								30.7692								14.124								4.17397				4				134	63	48			13
	GO:0001756~somitogenesis	3.73134				14.7059				29.4118				15.4917				13.5009				0.494217				0.703233				5				134	63	48	27	34	17
	GO:0001824~blastocyst development	2.23881				6.97674								7.34953								67.6551								3				134	63	48	27	43
	GO:0001892~embryonic placenta development	3.73134		4.16667		20.8333		8.33333		31.25				21.9465		24.5069		14.3447				0.122021		74.1161		0.547287				5		2		134	63	48	27	24	16
	GO:0007275~multicellular organismal development	64.9254	76.1905	72.9167	81.4815	3.03665	1.67539	1.22164	0.767888	6.9378	3.82775	2.79107	1.75439	3.19891	3.75394	3.59264	4.01463	3.18466	3.73722	3.57664	3.99675	1.25573e-25	1.16036e-17	3.42726e-11	9.95386e-08	6.38795e-26	1.01015e-17	3.31513e-11	1.01717e-07	87	48	35	22	134		48		2865	1254
	GO:0007368~determination of left/right symmetry	2.23881								13.0435								5.98735								80.1105				3				134	63	48	27		23
	GO:0007369~gastrulation	4.47761				8.57143				14.2857				9.02942				6.55757				0.897233				3.40792				6				134	63			70	42
	GO:0007398~ectoderm development	4.47761				3.01508				10.3448				3.17618				4.74858				51.4565				13.2646				6				134		48	27	199	58
	GO:0007498~mesoderm development	2.98507				5.40541				10.2564				5.69423				4.708				44.3494				60.5679				4				134		48		74	39
	GO:0009790~embryonic development	24.6269	20.6349	25	22.2222	5.80986	2.28873	2.11268	1.05634	11.7857	4.64286	4.28571	2.14286	6.1203	5.12821	6.21303	5.52269	5.40999	4.53305	5.49196	4.88175	1.9984e-13	0.00945817	0.00319339	5.38419	3.53051e-12	0.0301482	0.00970456	8.83895	33	13	12	6	134	63	48	27	568	280
	GO:0009792~embryonic development ending in birth or egg hatching	14.9254	9.52381	10.4167		5.98802	1.79641	1.49701		12.2699	3.68098	3.06748		6.30798	4.02509	4.40245		5.63227	3.59392	3.93085		5.64062e-07	23.5721	34.4436		2.43002e-06	33.7241	45.2362		20	6	5			63			334	163
	GO:0009952~anterior/posterior pattern formation	7.46269				7.14286				18.8679				7.52452				8.66094				0.0121699				0.00275431				10				134	63	48	27	140	53
	GO:0009953~dorsal/ventral pattern formation	2.98507								19.0476								8.74343								16.0898				4				134	63	48	27		21
	GO:0010769~regulation of cell morphogenesis involved in differentiation	8.20896	9.52381	12.5	14.8148	14.2857	7.79221	7.79221	5.19481	22.449	12.2449	12.2449	8.16327	15.049	17.4595	22.9156	27.1592	10.3048	11.9553	15.6913	18.5971	4.44433e-06	0.0369899	0.00916203	0.604746	0.000112767	0.206003	0.0523931	1.76194	11	6	6	4	134	63			77	49
	GO:0010770~positive regulation of cell morphogenesis involved in differentiation	3.73134	3.1746	6.25	7.40741	71.4286	28.5714	42.8571	28.5714	83.3333	33.3333	50	33.3333	75.2452	64.0181	126.036	149.376	38.2525	32.545	64.0729	75.9383	0.00045543	41.1655	0.379702	19.0364	0.00535299	64.8873	1.40895	34.0296	5	2	3	2	134	63			7	6
	GO:0017145~stem cell division	1.49254	3.1746							50	50							22.9515	48.8175							78.6551	50.2233			2	2			134		48			4
	GO:0030154~cell differentiation	49.2537	60.3175	54.1667	66.6667	4.03177	2.32132	1.58827	1.09957	9.20502	5.29986	3.62622	2.51046	4.24719	5.20123	4.67084	5.74873	4.22538	5.17451	4.64685	5.7192	1.9167e-23	2.07156e-16	6.67167e-09	2.09847e-07	8.27252e-24	1.66499e-16	6.33864e-09	2.09703e-07	66	38	26	18	134	63	48		1637	717
	GO:0030326~embryonic limb morphogenesis	5.22388	4.7619			8.04598	3.44828			16.6667	7.14286			8.4759	7.72633			7.6505	6.97392			0.297828	62.8878			0.445095	69.4318			7	3			134				87	42
	GO:0035113~embryonic appendage morphogenesis	5.22388	4.7619			8.04598	3.44828			16.6667	7.14286			8.4759	7.72633			7.6505	6.97392			0.297828	62.8878			0.445095	69.4318			7	3			134		48		87	42
	GO:0035116~embryonic hindlimb morphogenesis	2.23881								37.5								17.2136								19.0977				3				134	63	48	27		8
	GO:0045165~cell fate commitment	11.9403	12.6984	10.4167	14.8148	11.5108	5.7554	3.59712	2.8777	29.6296	14.8148	9.25926	7.40741	12.1258	12.8957	10.5785	15.045	13.6009	14.4644	11.8654	16.8752	5.88555e-09	0.00415658	1.93342	3.31412	3.55227e-10	0.0015723	1.20044	2.33272	16	8	5	4	134	63	48	27	139	54
	GO:0045595~regulation of cell differentiation	30.597	34.9206	37.5	37.037	8.33333	4.47154	3.65854	2.03252	16.8724	9.0535	7.40741	4.11523	8.77861	10.0191	10.7591	10.6263	7.74495	8.83938	9.49228	9.3751	1.34349e-23	1.33227e-12	2.21212e-10	0.000212525	3.27069e-22	1.07025e-11	1.28065e-09	0.000573883	41	22	18	10	134	63			492	243
	GO:0045596~negative regulation of cell differentiation	16.4179	19.0476	22.9167	22.2222	10.1852	5.55556	5.09259	2.77778	19.6429	10.7143	9.82143	5.35714	10.7294	12.448	14.9765	14.5226	9.01666	10.4609	12.5858	12.2044	1.76525e-12	3.68566e-06	3.04599e-06	0.0662987	2.1172e-11	1.78514e-05	1.32744e-05	0.145026	22	12	11	6	134				216	112
	GO:0045597~positive regulation of cell differentiation	12.6866	12.6984	14.5833	14.8148	7.42358	3.49345	3.05677	1.74672	16.0377	7.54717	6.60377	3.77358	7.82024	7.82755	8.98945	9.13214	7.3618	7.36867	8.46246	8.59679	8.02613e-07	0.106921	0.177221	12.7737	1.1533e-06	0.143602	0.231726	14.7348	17	8	7	4	134	63	48	27	229	106
	GO:0048332~mesoderm morphogenesis	2.23881				7.89474				13.0435				8.31658				5.98735				59.336				80.1105				3				134	63			38	23
	GO:0048339~paraxial mesoderm development	2.23881								33.3333								15.301								23.5919				3				134	63	48	27		9
	GO:0048340~paraxial mesoderm morphogenesis	2.23881								50								22.9515								10.9959				3				134		48	27		6
	GO:0048562~embryonic organ morphogenesis	2.98507								8.88889								4.08027								73.6244				4				134		48			45
	GO:0048568~embryonic organ development	6.71642		10.4167		5.23256		2.90698		13.4328		7.46269		5.51215		8.54893		6.16607		9.56312		0.391516		4.17462		0.15231		2.6868		9		5		134	63	48	27	172	67
	GO:0048598~embryonic morphogenesis	12.6866	9.52381	8.33333		5.53746	1.9544	1.30293		11.6438	4.10959	2.73973		5.83334	4.37909	3.8317		5.34487	4.01239	3.51084		5.41414e-05	17.4658	76.4222		0.000130744	23.4222	83.0461		17	6	4		134	63	48	27	307	146
	GO:0051093~negative regulation of developmental process	18.6567	20.6349	27.0833	25.9259	9.65251	5.01931	5.01931	2.7027	19.084	9.92366	9.92366	5.34351	10.1683	11.2464	14.7609	14.1301	8.76011	9.68896	12.7168	12.1733	3.35022e-14	1.85974e-06	5.62878e-08	0.00996317	3.88578e-13	7.88737e-06	2.45296e-07	0.0220819	25	13	13	7	134	63	48	27	259	131
	GO:0051094~positive regulation of developmental process	14.1791	14.2857	18.75	18.5185	6.83453	3.23741	3.23741	1.79856	14.6154	6.92308	6.92308	3.84615	7.19972	7.25385	9.52068	9.40314	6.7089	6.75934	8.87163	8.76211	2.11015e-07	0.0473742	0.00557668	2.52766	3.93635e-07	0.0715519	0.00851341	3.19885	19	9	9	5	134		48		278	130
	GO:0017015~regulation of transforming growth factor beta receptor signaling pathway	5.22388	4.7619	8.33333	7.40741	17.9487	7.69231	10.2564	5.12821	30.4348	13.0435	17.3913	8.69565	18.9078	17.2357	30.1624	26.811	13.9705	12.735	22.2862	19.81	0.00278816	19.7054	0.489263	69.2062	0.0120262	31.9013	1.11656	79.7445	7	3	4	2	134				39	23
	GO:0030509~BMP signaling pathway	3.73134		6.25		11.3636		6.81818		16.129		9.67742		11.9708		20.0511		7.40371		12.4012		1.33977		14.7166		7.12898		32.5672		5		3		134				44	31
	GO:0030511~positive regulation of transforming growth factor beta receptor signaling pathway	2.23881	3.1746	4.16667				15.3846		42.8571	28.5714	28.5714				45.2436		19.6727	27.8957	36.6131				51.8959		14.8694	70.5107	59.5993		3	2	2		134				13	7
	GO:0030949~positive regulation of vascular endothelial growth factor receptor signaling pathway	1.49254								50								22.9515								78.6551				2				134					4
	GO:0032909~regulation of transforming growth factor-beta2 production	2.23881		4.16667				50		100		66.6667				147.042		45.903		85.4306				20.1562		2.39603		32.1789		3		2		134		48		4	3
	GO:0006928~cell motion	17.1642	33.3333	22.9167	37.037	4.84211	4.42105	2.31579	2.10526	10.5505	9.63303	5.04587	4.58716	5.10083	9.90596	6.81035	11.0066	4.84298	9.4052	6.46607	10.4502	1.00724e-06	9.9365e-12	0.00483096	0.00015741	1.76452e-06	1.73861e-11	0.00703507	0.000226326	23	21	11	10	134	63	48		475	218
	GO:0008283~cell proliferation	17.1642	25.3968	16.6667	22.2222	5.27523	3.66972	1.83486	1.37615	10.3139	7.17489	3.58744	2.69058	5.5571	8.22251	5.39602	7.1947	4.73439	7.0052	4.59716	6.12955	1.97717e-07	7.41062e-07	0.927157	1.71434	2.72573e-06	5.41767e-06	2.28178	3.3981	23	16	8	6	134	63	48	27	436	223
	GO:0008284~positive regulation of cell proliferation	16.4179	22.2222	22.9167	25.9259	5.31401	3.38164	2.657	1.69082	10.7843	6.86275	5.39216	3.43137	5.59795	7.57703	7.81381	8.83986	4.95032	6.70044	6.90982	7.81718	4.99455e-07	3.81527e-05	0.00139767	0.140303	3.08065e-06	0.000136896	0.00386129	0.266797	22	14	11	7	134	63	48	27	414	204
	GO:0008285~negative regulation of cell proliferation	17.1642	19.0476	27.0833	33.3333	6.37119	3.3241	3.60111	2.49307	12.7778	6.66667	7.22222	5	6.71162	7.44809	10.5903	13.0342	5.86538	6.50899	9.25498	11.3907	4.94377e-09	0.000714966	2.56937e-06	0.000289306	4.0389e-08	0.0023694	9.86851e-06	0.00074972	23	12	13	9	134	63	48	27	361	180
	GO:0042127~regulation of cell proliferation	34.3284	36.5079	47.9167	51.8519	5.84498	2.92249	2.92249	1.77891	11.6456	5.82278	5.82278	3.5443	6.15729	6.54823	8.59456	9.30039	5.34566	5.68507	7.46166	8.07445	1.12618e-20	1.38707e-09	1.31006e-12	3.94883e-07	1.2108e-18	1.79771e-08	1.87295e-11	2.05787e-06	46	23	23	14	134	63			787	395
	GO:0051129~negative regulation of cellular component organization			10.4167	11.1111			3.52113	2.11268	9.30233	6.97674	5.81395	3.48837			10.355	11.0454	4.27005	6.81174	7.45034	7.94703			2.09092	37.0474	4.2412	2.79377	6.57086	57.2043	8	6	5	3	134	63	48	27	142	86
	GO:0051130~positive regulation of cellular component organization	8.95522	9.52381			6.62983	3.31492			12.2449	6.12245			6.98409	7.42752			5.62077	5.97765			0.0019516	2.00353			0.0127304	4.91666			12	6			134	63	48	27	181	98
	GO:0051270~regulation of cell motion	16.4179	26.9841	27.0833	33.3333	11.399	8.80829	6.73575	4.66321	20.7547	16.0377	12.2642	8.49057	12.008	19.7362	19.8087	24.38	9.52703	15.6584	15.716	19.3428	1.9984e-13	1.88738e-13	1.75698e-09	2.18645e-06	6.4726e-12	4.58522e-12	1.94479e-08	1.17831e-05	22	17	13	9	134	63	48	27	193	106
	GO:0051271~negative regulation of cell motion	5.97015	9.52381	12.5	14.8148	12.6984	9.52381	9.52381	6.34921	23.5294	17.6471	17.6471	11.7647	13.3769	21.3394	28.0079	33.1946	10.8007	17.2297	22.614	26.8017	0.00354268	0.0137951	0.00337471	0.334384	0.0110123	0.0337848	0.00833008	0.600138	8	6	6	4	134	63	48		63	34
	GO:0051272~positive regulation of cell motion	10.4478	17.4603	16.6667	22.2222	14.2857	11.2245	8.16327	6.12245	25.9259	20.3704	14.8148	11.1111	15.049	25.15	24.0068	32.0091	11.9008	19.8886	18.9846	25.3128	1.22249e-08	2.23425e-08	5.29105e-05	0.00139497	1.15129e-07	1.48526e-07	0.000218027	0.00403919	14	11	8	6	134	63			98	54
KEGG	hsa04060:Cytokine-cytokine receptor interaction	7.46269	15.873	14.5833	25.9259	3.81679	3.81679	2.67176	2.67176	14.7059	14.7059	10.2941	10.2941	1.83098	3.40498	3.39647	5.43435	3.10766	5.77915	5.76471	9.22353	64.9827	2.04001	13.2258	1.03336	4.08568	0.0320304	0.947268	0.0525594	10	10	7	7	106	57	40	25	262	68	5085	2240
	hsa04510:Focal adhesion	14.9254	25.3968	18.75	29.6296	9.95025	7.9602	4.47761	3.9801	15.873	12.6984	7.14286	6.34921	4.7733	7.10134	5.69216	8.09552	3.3543	4.99025	4	5.68889	1.91211e-05	2.13607e-06	0.113613	0.0254053	0.00317751	0.000182905	1.1493	0.224095	20	16	9	8	106	57	40	25	201	126
	hsa04512:ECM-receptor interaction	7.46269	15.873	12.5	22.2222	11.9048	11.9048	7.14286	7.14286	22.2222	22.2222	13.3333	13.3333	5.71092	10.6203	9.08036	14.5286	4.69602	8.73294	7.46667	11.9467	0.0543853	0.000245751	0.413677	0.0347384	0.184883	0.000898323	0.921855	0.0799729	10	10	6	6	106		40		84	45
	hsa04520:Adherens junction	9.70149	7.93651	8.33333	11.1111	16.8831	6.49351	5.19481	3.8961	22.807	8.77193	7.01754		8.09912	5.79289	6.6039	7.92468	4.8196	3.44721	3.92982		4.2429e-05	9.67749	19.2609	39.0902	0.00801785	42.2225	54.9853		13	5	4	3	106				77	57
	hsa04810:Regulation of actin cytoskeleton		11.1111	10.4167	18.5185			2.32558	2.32558		6.08696		4.34783			2.9564	4.73023		2.39207		3.89565			57.8155	15.1327		49.477		26.4867		7	5	5	106	57	40	25	215	115
	hsa04320:Dorso-ventral axis formation	2.98507	4.7619	6.25	11.1111			12	12	28.5714	21.4286	21.4286	21.4286			15.255	24.408	6.03774	8.42105	12	19.2			14.7032	5.60199	24.4373	38.4562	21.6927	8.5316	4	3	3	3	106	57			25	14
	hsa04010:MAPK signaling pathway	10.4478	11.1111	12.5		5.24345	2.62172	2.24719		9.45946				2.51537	2.33885	2.85674		1.99898				3.40195	53.4015	41.7917		18.7372				14	7	6		106		40	25	267	148
	hsa04310:Wnt signaling pathway	10.4478				9.27152				15.0538				4.44771				3.18117				0.0121928				0.309329				14				106	57	40	25	151	93
	hsa04330:Notch signaling pathway	5.97015	7.93651			17.0213	10.6383			36.3636	22.7273			8.1654	9.49048			7.68439	8.93142			0.0462531	1.69027			0.0430098	1.8706			8	5			106	57	40	25	47	22
	hsa04350:TGF-beta signaling pathway	11.9403	6.34921	18.75	14.8148	18.3908	4.5977	10.3448	4.5977	26.2295		14.7541	6.55738	8.82238	4.10163	13.1509	9.35172	5.54284		8.2623	5.87541	1.63877e-07	52.6759	0.000217158	7.01048	5.55619e-05		0.00617046	22.2365	16	4	9	4	106	57	40		87	61
	hsa04110:Cell cycle	11.9403		14.5833		12.8		5.6		19.2771		8.43373		6.14038		7.119		4.07365		4.72289		2.96305e-05		0.33616		0.00404479		2.67386		16		7			57		25	125	83
	hsa05200:Pathways in cancer	34.3284	25.3968	35.4167	37.037	14.0244	4.87805	5.18293	3.04878	23.4694	8.16327	8.67347	5.10204	6.72774	4.35173	6.5888	6.20122	4.95957	3.20802	4.85714	4.57143	5.09358e-24	0.00149632	6.2197e-07	0.00914837	2.50587e-19	0.0526116	4.14223e-05	0.0983777	46	16	17	10	106	57	40	25	328	196

## Sheet: G) C-S interface
Term		%		% (human)	% (human)	% (hESC)	% (hESC)	Fold Enrichment (human)	Fold Enrichment (human)	Fold Enrichment (hESC)	Fold Enrichment (hESC)	FDR (human)	FDR (human)	FDR (hESC)	FDR (hESC)	Count	Count (human)	List Total	List Total (hESC)	Pop Hits (human)	Pop Hits (hESC)	Pop Total (human)	Pop Total (hESC)
		ALL_EC+TF	ALL_EC	ALL_EC+TF	ALL_EC	ALL_EC+TF	ALL_EC	ALL_EC+TF	ALL_EC	ALL_EC+TF	ALL_EC	ALL_EC+TF	ALL_EC	ALL_EC+TF	ALL_EC	ALL_EC+TF	ALL_EC	ALL_EC+TF	ALL_EC
GO	GO:0006350~transcription	31.8182		0.999524		1.9981		2.23957		1.95084		0.730728		4.0604		21		63	37	2101	1051	14116	6151
	GO:0010467~gene expression	34.8485		0.766922		1.47059		1.71839		1.43581		10.8158		57.2322		23		63	37	2999	1564		6151
	GO:0010468~regulation of gene expression	54.5455	32.5	1.2605	0.455182	2.55319		2.82433	1.73658	2.49281		5.90546e-07	53.3796	1.76139e-05		36	13	63	37	2856	1410		6151
	GO:0010628~positive regulation of gene expression	24.2424	15	2.75387	1.0327	5.73477	2.15054	6.17042	3.9399	5.59914	3.57512	3.54148e-05	22.158	0.000109729	30.4886	16	6	63	37	581	279		6151
	GO:0010629~negative regulation of gene expression	19.697	17.5	2.57937	1.38889	4.71014	2.53623	5.77942	5.2988	4.59875	4.21631	0.00265614	2.53661	0.025174	7.59615	13	7	63	37	504	276		6151
	GO:0016481~negative regulation of transcription	18.1818	17.5	2.61438	1.52505	4.91803	2.86885	5.85787	5.81829	4.80172	4.76927	0.0071978	1.57484	0.0428866	4.19289	12	7	63	37	459	244		6151
	GO:0045449~regulation of transcription	51.5152		1.30719		2.69627		2.92893		2.6325		1.18095e-06		1.77811e-05		34		63	37	2601	1261		6151
	GO:0045941~positive regulation of transcription	22.7273	12.5	2.65957	0.886525	5.47445	1.82482	5.95914	3.38221	5.34498	3.03364	0.000185083	59.6843	0.000612455	71.6307	15	5	63	37	564	274		6151
	GO:0007154~cell communication	19.697	27.5	1.63522	1.38365	4.49827	3.80623	3.66393	5.2788	4.39188	6.3276	0.24795	0.0329517	0.0399789	0.00626999	13	11	63	37	795	289		6151
	GO:0007267~cell-cell signaling	15.1515	25	1.66667	1.66667	4.92611	4.92611	3.73439	6.35856	4.8096	8.18932	1.90063	0.023374	0.286949	0.00275671	10	10	63	37	600	203		6151
	GO:0010646~regulation of cell communication	21.2121	32.5	1.34875	1.25241	2.68199	2.49042	3.02205	4.77811	2.61856	4.14016	0.792213	0.00914484	2.86876	0.0377031	14	13	63	37	1038	522		6151
	GO:0010647~positive regulation of cell communication	12.1212	17.5	2.43161	2.12766	4.93827	4.32099	5.44835	8.11731	4.82148	7.18335	0.94933	0.269367	1.85058	0.500958	8	7	63	37	329	162		6151
	GO:0016337~cell-cell adhesion	7.57576	10			4.58716	3.66972			4.47867	6.10067			32.8808	34.1737	5	4	63	37		109		6151
	GO:0000904~cell morphogenesis involved in differentiation	6.06061	10	1.63934	1.63934		3.53982	3.67317	6.25432		5.88472	79.8619	32.6658		36.8465	4	4	63	37	244	113		6151
	GO:0001708~cell fate specification		5				12.5				20.7804				78.4431		2	63	37		16		6151
	GO:0001701~in utero embryonic development	6.06061		2.27273		4.16667		5.09235		4.06812		51.1409		71.1383		4		63	37	176	96		6151
	GO:0007275~multicellular organismal development	50	65	1.15183	0.907504	2.63158	2.07337	2.58084	3.46225	2.56934	3.44683	6.81048e-05	4.10229e-07	6.85062e-05	4.16152e-07	33	26	63	37	2865	1254		6151
	GO:0007398~ectoderm development		7.5		1.50754		5.17241		5.75146		8.59879		79.0017		52.716		3	63	37	199	58		6151
	GO:0007492~endoderm development	3.0303	5			33.3333	33.3333			32.545	55.4144			63.5947	43.7271	2	2	63	37		6		6151
	GO:0009790~embryonic development	18.1818	20	2.11268	1.40845	4.28571	2.85714	4.73374	5.37343	4.18435	4.74981	0.0530739	0.807321	0.151476	1.62737	12	8	63	37	568	280		6151
	GO:0009792~embryonic development ending in birth or egg hatching	9.09091		1.79641		3.68098		4.02509		3.59392		22.8591		32.7757		6		63	37	334	163		6151
	GO:0009948~anterior/posterior axis specification	3.0303	5			50	50			48.8175	83.1216			49.0093	31.8353	2	2	63	37		4		6151
	GO:0010769~regulation of cell morphogenesis involved in differentiation	4.54545	7.5	3.8961	3.8961	6.12245	6.12245	8.72975	14.8642	5.97765	10.1782	53.4718	23.6665	77.9456	42.1413	3	3	63	37	77	49		6151
	GO:0010770~positive regulation of cell morphogenesis involved in differentiation	3.0303	5	28.5714	28.5714	33.3333	33.3333	64.0181	109.004	32.545	55.4144	40.0776	25.3046	63.5947	43.7271	2	2	63	37	7	6		6151
	GO:0017145~stem cell division	3.0303	5			50	50			48.8175	83.1216			49.0093	31.8353	2	2	63	37		4		6151
	GO:0019827~stem cell maintenance	4.54545	7.5	12	12	18.75	18.75	26.8876	45.7816	18.3065	31.1706	8.5063	2.94223	16.7255	6.01759	3	3	63	37	25	16		6151
	GO:0030154~cell differentiation	34.8485	47.5	1.40501	1.16066	3.20781	2.64993	3.14811	4.42807	3.13194	4.40533	0.00128396	2.48056e-05	0.00127533	2.48118e-05	23	19	63	37	1637	717		6151
	GO:0035116~embryonic hindlimb morphogenesis	3.0303	5			25	25			24.4087	41.5608			74.011	53.5473	2	2	63	37		8		6151
	GO:0045165~cell fate commitment	7.57576	12.5	3.59712	3.59712	9.25926	9.25926	8.05984	13.7235	9.04027	15.3929	5.23165	0.67549	3.32137	0.413372	5	5	63	37	139	54		6151
	GO:0045168~cell-cell signaling involved in cell fate specification	3.0303	5			28.5714	28.5714			27.8957	47.4981			69.2402	48.8721	2	2	63	37		7		6151
	GO:0045595~regulation of cell differentiation	25.7576	40	3.45528	3.25203	6.99588	6.58436	7.74203	12.4069	6.83043	10.9461	3.85195e-07	5.10536e-10	1.92613e-06	2.51645e-09	17	16	63	37	492	243		6151
	GO:0045596~negative regulation of cell differentiation	12.1212	20	3.7037	3.7037	7.14286	7.14286	8.29865	14.1301	6.97392	11.8745	0.0712952	0.00166519	0.196548	0.00484274	8	8	63	37	216	112		6151
	GO:0045597~positive regulation of cell differentiation	18.1818	27.5	5.24017	4.80349	11.3208	10.3774	11.7413	18.326	11.053	17.2517	6.57694e-06	2.9752e-07	9.56231e-06	4.29334e-07	12	11	63	37	229	106		6151
	GO:0048562~embryonic organ morphogenesis	4.54545				6.66667				6.50899				72.6602		3		63	37		45		6151
	GO:0048568~embryonic organ development	6.06061		2.32558		5.97015		5.21078		5.82895		49.1154		39.2994		4		63	37	172	67		6151
	GO:0048598~embryonic morphogenesis	7.57576	10	1.62866	1.30293	3.42466	2.73973	3.64924	4.97086	3.34366	4.55461	54.0889	51.1069	63.5609	58.8075	5	4	63	37	307	146		6151
	GO:0048863~stem cell differentiation	4.54545	7.5			17.6471	17.6471			17.2297	29.337			18.6362	6.76964	3	3	63	37		17		6151
	GO:0048864~stem cell development	4.54545	7.5	11.5385	11.5385	17.6471	17.6471	25.8535	44.0208	17.2297	29.337	9.15888	3.17869	18.6362	6.76964	3	3	63	37	26	17		6151
	GO:0051093~negative regulation of developmental process	16.6667	25	4.2471	3.861	8.39695	7.63359	9.51621	14.7303	8.19835	12.6903	0.000280725	2.04435e-05	0.000949431	6.46424e-05	11	10	63	37	259	131		6151
	GO:0051094~positive regulation of developmental process	19.697	30	4.67626	4.31655	10	9.23077	10.4778	16.4682	9.76349	15.3455	4.01376e-06	8.9915e-08	6.97042e-06	1.53709e-07	13	12	63	37	278	130		6151
	GO:0008543~fibroblast growth factor receptor signaling pathway	6.06061	10	13.7931	13.7931	30.7692	30.7692	30.9053	52.6226	30.0415	51.1518	0.450642	0.0867503	0.430484	0.0825261	4	4	63	37	29	13		6151
	GO:0030509~BMP signaling pathway	6.06061	10	9.09091	9.09091	12.9032	12.9032	20.3694	34.683	12.5981	21.4507	1.55048	0.305959	5.79425	1.20009	4	4	63	37	44	31		6151
	GO:0032925~regulation of activin receptor signaling pathway	3.0303	5			28.5714	28.5714			27.8957	47.4981			69.2402	48.8721	2	2	63	37		7		6151
	GO:0006928~cell motion	16.6667	27.5	2.31579	2.31579	5.04587	5.04587	5.18884	8.83505	4.92653	8.38842	0.0628586	0.000319841	0.0902418	0.000470493	11	11	63	37	475	218		6151
	GO:0008283~cell proliferation	12.1212	17.5	1.83486	1.6055	3.58744	3.13901	4.11126	6.12522	3.5026	5.2184	4.71749	1.20687	10.6541	2.67454	8	7	63	37	436	223		6151
	GO:0008284~positive regulation of cell proliferation	21.2121	27.5	3.38164	2.657	6.86275	5.39216	7.57703	10.1368	6.70044	8.9641	3.68349e-05	8.8565e-05	0.000132167	0.000252316	14	11	63	37	414	204		6151
	GO:0008285~negative regulation of cell proliferation	12.1212	15	2.21607	1.66205	4.44444	3.33333	4.9654	6.34094	4.33933	5.54144	1.63373	3.35532	3.37865	5.81408	8	6	63	37	361	180		6151
	GO:0042127~regulation of cell proliferation	27.2727	32.5	2.28717	1.65184	4.55696	3.29114	5.12471	6.302	4.44919	5.4713	4.70305e-05	0.00048969	0.000321541	0.00207426	18	13	63	37	787	395		6151
	GO:0051130~positive regulation of cellular component organization	7.57576	10	2.76243	2.20994	5.10204	4.08163	6.1896	8.43124	4.98137	6.78544	12.7603	16.3117	24.4122	27.0561	5	4	63	37	181	98		6151
	GO:0051270~regulation of cell motion	10.6061	17.5	3.62694	3.62694	6.60377	6.60377	8.12666	13.8373	6.44759	10.9783	0.326303	0.0136519	1.05617	0.0474475	7	7	63	37	193	106		6151
	GO:0051272~positive regulation of cell motion	9.09091	15	6.12245	6.12245	11.1111	11.1111	13.7182	23.358	10.8483	18.4715	0.114343	0.00754794	0.317186	0.0216015	6	6	63	37	98	54		6151
KEGG	hsa03022:Basal transcription factors	6.06061		11.4286		20		12.6335		9.73913		3.48901		6.72073		4		46	32	35	20	5085	2240
	hsa04060:Cytokine-cytokine receptor interaction	18.1818	30	4.58015	4.58015	17.6471	17.6471	5.06306	7.27815	8.59335	12.3529	0.0119111	0.000181556	4.05291e-05	4.52056e-07	12	12	46	32	262	68		2240
	hsa04520:Adherens junction	6.06061	10	5.19481	5.19481		7.01754	5.74252	8.25487		4.91228	26.7319	10.2891		34.491	4	4	46	32	77	57		2240
	hsa04010:MAPK signaling pathway	16.6667	22.5	4.11985	3.37079	7.43243	6.08108	4.55423	5.35639	3.61927	4.25676	0.0852516	0.139006	0.509477	0.625999	11	9	46	32	267	148		2240
	hsa04310:Wnt signaling pathway	7.57576		3.31126				3.66038				36.391				5		46	32	151			2240
	hsa04350:TGF-beta signaling pathway	13.6364	20	10.3448	9.1954	14.7541	13.1148	11.4355	14.6121	7.1846	9.18033	0.000695456	0.000618636	0.0188917	0.0120409	9	8	46	32	87	61		2240
	hsa04110:Cell cycle	6.06061		3.2				3.53739				64.9429				4		46	32	125			2240
	hsa05200:Pathways in cancer	25.7576	27.5	5.18293	3.35366	8.67347	5.61224	5.72939	5.32917	4.2236	3.92857	7.41158e-06	0.0138912	0.000438206	0.176472	17	11	46	32	328	196		2240

## Sheet: H) EC-TF interface
Term		%				% (hESC)	% (hESC)	% (hESC)	% (hESC)	% (human)	% (human)	% (human)	% (human)	Fold Enrichment (hESC)	Fold Enrichment (hESC)	Fold Enrichment (hESC)	Fold Enrichment (hESC)	Fold Enrichment (human)	Fold Enrichment (human)	Fold Enrichment (human)	Fold Enrichment (human)	FDR (hESC)	FDR (hESC)	FDR (hESC)	FDR (hESC)	FDR (human)	FDR (human)	FDR (human)	FDR (human)	Count				List Total	List Total (human)	List Total (human)	List Total (human)	Pop Hits (hESC)	Pop Hits (human)	Pop Total (hESC)	Pop Total (human)
		ALL_EC+TF	ALL_EC	C+S_EC+TF	C+S_EC	ALL_EC+TF	ALL_EC	C+S_EC+TF	C+S_EC	ALL_EC+TF	ALL_EC	C+S_EC+TF	C+S_EC	ALL_EC+TF	ALL_EC	C+S_EC+TF	C+S_EC	ALL_EC+TF	ALL_EC	C+S_EC+TF	C+S_EC	ALL_EC+TF	ALL_EC	C+S_EC+TF	C+S_EC	ALL_EC+TF	ALL_EC	C+S_EC+TF	C+S_EC	ALL_EC+TF	ALL_EC	C+S_EC+TF	C+S_EC	ALL_EC+TF	ALL_EC	C+S_EC+TF	C+S_EC
GO	GO:0006350~transcription	37.8738		30		10.8468		3.42531		5.42599		1.71347		2.26935		1.8163		2.60521		2.08512		2.4659e-16		0.46027		1.28409e-20		0.0281786		114		36		294	156	116	72	1051	2101	6151	14116
	GO:0010467~gene expression	42.1927		32.5		8.1202		2.49361		4.23474		1.30043		1.69889		1.32226		2.03325		1.58249		2.51832e-08		50.4051		2.62285e-14		3.64023		127		39		294	156	116		1564	2999
	GO:0010468~regulation of gene expression	51.1628		44.1667		10.922		3.75887		5.39216		1.85574		2.28507		1.99317		2.58897		2.25825		5.5459e-26		0.000145549		1.69997e-31		2.01602e-06		154		53		294	156	116		1410	2856
	GO:0010628~positive regulation of gene expression	24.5847		20.8333		26.5233		8.96057		12.7367		4.30293		5.54914		4.75142		6.11533		5.23622		4.90175e-33		3.1617e-07		5.76529e-34		6.28331e-08		74		25		294	156	116		279	581
	GO:0010629~negative regulation of gene expression	16.2791		14.1667		17.7536		6.15942		9.72222		3.37302		3.71437		3.26609		4.66799		4.10461		1.79856e-12		0.0816699		6.6952e-16		0.00545714		49		17		294	156	116		276	504
	GO:0016481~negative regulation of transcription	15.6146		13.3333	8	19.2623		6.55738		10.2397		3.48584	1.30719	4.03001		3.47711		4.91643		4.24191	2.56282	1.9984e-13		0.0732881		5.27469e-16		0.00803571	75.9613	47		16	6	294	156	116		244	459
	GO:0045449~regulation of transcription	48.8372		42.5		11.6574		4.04441		5.65167		1.96078		2.43894		2.14458		2.71357		2.38607		2.04058e-27		2.71386e-05		9.86496e-32		7.71926e-07		147		51		294	156	116		1261	2601
	GO:0045941~positive regulation of transcription	24.2525		20		26.6423		8.75912		12.9433		4.25532		5.57405		4.6446		6.21453		5.17828		1.18883e-32		1.31535e-06		6.71999e-34		2.21799e-07		73		24		294	156	116		274	564
	GO:0001952~regulation of cell-matrix adhesion	1.3289	1.85185	2.5		28.5714	21.4286	21.4286				11.1111		5.97765	8.44918	11.3627				13.5211		38.2431	57.3647	37.9699				29.7677		4	3	3		294	156	116		14	27
	GO:0003001~generation of a signal involved in cell-cell signaling	2.65781	3.7037			29.6296	22.2222							6.19904	8.76211							0.363612	0.864261							8	6			294	156	116		27
	GO:0007044~cell-substrate junction assembly	1.66113	3.08642			33.3333	33.3333			21.7391	21.7391			6.97392	13.1432			10.4377	19.6711			7.87929	0.750806			2.10766	0.185855			5	5			294	156	116		15	23
	GO:0007154~cell communication	15.9468	21.6049	17.5	24	16.609	12.1107	7.26644	6.22837	6.03774	4.40252	2.64151	2.26415	3.4749	4.7752	3.85309	5.32093	2.89893	3.98371	3.21444	4.43899	5.31242e-11	2.3348e-11	0.000500666	2.9088e-05	1.16244e-07	8.73519e-09	0.0101808	0.000481101	48	35	21	18	294	156	116		289	795
	GO:0007155~cell adhesion	11.9601	19.1358	15	22.6667	11.9205	10.2649	5.96026	5.62914	5.14286	4.42857	2.57143	2.42857	2.49399	4.0474	3.16048	4.809	2.46927	4.00729	3.12916	4.76135	0.0011846	8.76307e-08	0.0673661	0.000356184	0.00229596	1.86393e-07	0.0864377	0.000473214	36	31	18	17	294	156	116		302	700
	GO:0007267~cell-cell signaling	11.6279	16.6667	14.1667	21.3333	17.2414	13.3005	8.37438	7.88177	5.83333	4.5	2.83333	2.66667	3.6072	5.24432	4.44059	6.73344	2.80079	4.07192	3.44787	5.22815	1.19856e-07	6.47525e-09	0.0015898	1.08372e-05	0.000185935	3.11453e-06	0.0482113	0.00038027	35	27	17	16	294	156	116		203	600
	GO:0010646~regulation of cell communication	24.5847	32.0988	25	32	14.1762	9.96169	5.74713	4.5977	7.12909	5.00963	2.89017	2.31214	2.96592	3.92784	3.04746	3.92784	3.42294	4.53308	3.51704	4.53308	4.35224e-15	2.63604e-15	9.07421e-05	1.32542e-05	5.95524e-18	1.29761e-17	4.63095e-06	9.8379e-07	74	52	30	24	294	156	116		522	1038
	GO:0010647~positive regulation of cell communication	14.2857	21.6049	14.1667	21.3333	26.5432	21.6049	10.4938	9.87654	13.0699	10.6383	5.16717	4.86322	5.55331	8.51872	5.56444	8.43759	6.27533	9.6263	6.28792	9.53462	2.27673e-17	1.39963e-19	6.94041e-05	4.58285e-07	2.41652e-18	1.50187e-20	1.69333e-05	1.12415e-07	43	35	17	16	294	156	116		162	329
	GO:0010648~negative regulation of cell communication	6.97674	6.79012	8.33333	8	16.4062	8.59375	7.8125	4.6875	8.46774	4.43548	4.03226	2.41935	3.43248	3.38847	4.14265	4.00456	4.06567	4.01354	4.90684	4.74328	0.00381646	2.39117	1.04077	23.4719	0.000426391	0.727857	0.331907	12.9268	21	11	10	6	294	156	116		128	248
	GO:0016337~cell-cell adhesion	3.65449	5.55556	5	6.66667	10.0917	8.25688	5.50459	4.58716			2.17391	1.81159	2.11137	3.25565	2.91885	3.91883			2.64543	3.55173	46.6032	10.0848	60.8479	46.7465			74.0794	58.0783	11	9	6	5	294	156	116		109	276
	GO:0022407~regulation of cell-cell adhesion	1.3289	1.85185	2.5		26.6667	20	20		18.1818	13.6364	13.6364		5.57914	7.8859	10.6052		8.72975	12.3392	16.594		44.1967	62.1273	42.042		16.8641	34.8697	21.1782		4	3	3		294	156	116		15	22
	GO:0022409~positive regulation of cell-cell adhesion	0.996678		1.66667		42.8571						18.1818		8.96647						22.1254		52.607						78.9205		3		2		294	156	116		7	11
	GO:0022610~biological adhesion	11.9601	19.1358	15	22.6667	11.9205	10.2649	5.96026	5.62914	5.13552	4.42225	2.56776	2.42511	2.49399	4.0474	3.16048	4.809	2.46575	4.00157	3.1247	4.75456	0.0011846	8.76307e-08	0.0673661	0.000356184	0.00237624	1.92987e-07	0.0879876	0.000482424	36	31	18	17	294	156	116		302	701
	GO:0030036~actin cytoskeleton organization		5.55556				7.14286								2.81639								21.8662								9			294	156	116		126
	GO:0030155~regulation of cell adhesion	6.31229	9.87654	10.8333	14.6667	29.6875	25	20.3125	17.1875	13.8686	11.6788	9.48905	8.0292	6.21115	9.85737	10.7709	14.6834	6.65882	10.5678	11.5472	15.7417	8.46127e-07	5.17292e-08	2.565e-06	3.40874e-06	8.34848e-07	4.45469e-08	1.95458e-06	2.50977e-06	19	16	13	11	294	156	116		64	137
	GO:0030198~extracellular matrix organization	3.98671	4.93827	5	6.66667	22.2222	14.8148	11.1111	9.25926	11.5385	7.69231	5.76923	4.80769	4.64928	5.84141	5.89176	7.91024	5.54003	6.96055	7.02056	9.42575	0.0654568	0.650397	5.3778	5.48792	0.0185538	0.258634	2.71994	3.07878	12	8	6	5	294	156	116		54	104
	GO:0034329~cell junction assembly	1.99336	3.08642	2.5		26.087	21.7391	13.0435				7.31707		5.45785	8.57163	6.91642				8.90412		6.85545	4.09609	70.3857				53.9968		6	5	3		294	156	116		23	41
	GO:0034330~cell junction organization	2.99003	4.32099	5	5.33333	27.2727	21.2121	18.1818	12.1212	15.7895	12.2807	10.5263	7.01754	5.70594	8.36383	9.64107	10.3552	7.5811	11.1125	12.8094	13.7583	0.212473	0.258714	0.564131	10.0839	0.038631	0.0642624	0.169744	4.84594	9	7	6	4	294	156	116		33	57
	GO:0043062~extracellular structure organization	4.65116	5.55556	5	6.66667	17.0732	10.9756	7.31707	6.09756	8.58896	5.52147	3.68098	3.06748	3.57201	4.32763	3.87994	5.20918	4.12387	4.99622	4.47937	6.01397	0.206386	1.74591	27.2702	21.8593	0.0641455	0.767089	16.9872	14.3635	14	9	6	5	294	156	116		82	163
	GO:0045216~cell-cell junction organization	1.66113	1.85185	3.33333		26.3158	15.7895	21.0526				11.4286		5.50573	6.22571	11.1633				13.9074		18.2244	77.7787	8.23865				4.81857		5	3	4		294	156	116		19	35
	GO:0051893~regulation of focal adhesion formation	0.996678		1.66667		60		40				25		12.5531		21.2103				30.4224		31.2649		80.4594				67.766		3		2		294	156	116		5	8
	GO:0051895~negative regulation of focal adhesion formation		1.23457				66.6667								26.2863								74.1694								2			294	156	116		3
	GO:0000904~cell morphogenesis involved in differentiation	7.30897	9.87654	7.5	10.6667	19.469	14.1593	7.9646	7.07965	9.01639	6.55738	3.68852	3.27869	4.07326	5.58294	4.2233	6.04818	4.3291	5.93359	4.48855	6.42805	0.000100249	0.000202528	2.00398	0.497956	6.92581e-05	0.000133932	1.47228	0.369961	22	16	9	8	294	156	116		113	244
	GO:0001701~in utero embryonic development	4.65116				14.5833				7.95455				3.05109				3.81926				1.02119				0.142086				14				294	156	116		96	176
	GO:0001702~gastrulation with mouth forming second	0.996678				30								6.27653								77.3865								3				294	156	116		10
	GO:0001704~formation of primary germ layer	2.65781	1.85185			33.3333				20	7.5			6.97392				9.60272	6.78654			0.160486				0.0289023	72.9256			8	3			294	156	116		24	40
	GO:0001706~endoderm formation	0.664452				100								20.9218								82.8392								2				294	156	116		2
	GO:0001707~mesoderm formation	2.32558	1.85185			30.4348				19.4444	8.33333			6.36749				9.33598	7.5406			1.01173				0.158037	65.9891			7	3			294	156	116		23	36
	GO:0001708~cell fate specification	2.99003	3.7037			56.25	37.5			17.6471	11.7647			11.7685	14.7861			8.47299	10.6456			0.000401381	0.0587429			0.016583	0.412671			9	6			294	156	116		16	51
	GO:0001756~somitogenesis	2.65781	2.46914			47.0588	23.5294			23.5294	11.7647			9.84554	9.27753			11.2973	10.6456			0.012047	13.5934			0.00927891	10.1793			8	4			294	156	116		17	34
	GO:0001892~embryonic placenta development	1.66113				31.25				20.8333				6.53805				10.0028				10.0081				2.48377				5				294	156	116		16	24
	GO:0007275~multicellular organismal development	55.1495	61.1111	62.5	65.3333	13.2376	7.89474	5.98086	3.9075	5.79407	3.4555	2.6178	1.7103	2.76955	3.11285	3.1714	3.3382	2.78194	3.12678	3.18559	3.35313	8.29239e-41	1.08481e-28	8.5316e-22	9.55603e-15	1.39378e-39	2.71869e-28	1.33928e-21	1.08517e-14	166	99	75	49	294	156	116		1254	2865
	GO:0007368~determination of left/right symmetry	1.66113				21.7391								4.54821								32.8398								5				294	156	116		23
	GO:0007369~gastrulation	4.31894	3.08642			30.9524	11.9048			18.5714	7.14286			6.47579	4.69399			8.91681	6.46337			0.000601825	30.8519			3.35268e-05	12.1699			13	5			294	156	116		42	70
	GO:0007398~ectoderm development	4.65116	5.55556			24.1379	15.5172	6.89655		7.03518	4.52261			5.05008	6.11837	3.65696		3.37784	4.09239			0.00410021	0.15767	81.813		0.48336	2.80044			14	9	4		294	156	116		58	199
	GO:0007492~endoderm development	0.996678				50								10.4609								42.1567								3				294	156	116		6
	GO:0007498~mesoderm development	3.65449	3.08642			28.2051	12.8205			14.8649	6.75676			5.90101	5.05506			7.13716	6.114			0.0172839	24.9174			0.00511059	14.5795			11	5			294	156	116		39	74
	GO:0009790~embryonic development	18.2724	15.4321	15.8333	14.6667	19.6429	8.92857	6.78571	3.92857	9.6831	4.40141	3.34507	1.93662	4.10963	3.52049	3.59818	3.3562	4.6492	3.98271	4.0706	3.79685	1.28407e-16	0.000174492	0.00614919	2.13688	3.20735e-18	2.3156e-05	0.00126548	0.873813	55	25	19	11	294	156	116		280	568
	GO:0009792~embryonic development ending in birth or egg hatching	9.63455	6.17284	7.5		17.7914	6.13497	5.52147		8.68263	2.99401	2.69461		3.72228	2.41899	2.92781		4.16885	2.7092	3.27906		3.58943e-06	31.88	17.3868		6.19914e-07	18.4897	9.84215		29	10	9		294	156	116		163	334
	GO:0009950~dorsal/ventral axis specification	0.996678				50								10.4609								42.1567								3				294	156	116		6
	GO:0009952~anterior/posterior pattern formation	5.31561	4.93827			30.1887	15.0943			11.4286	5.71429			6.31601	5.95162			5.48727	5.1707			2.26272e-05	0.578339			0.000384501	1.56519			16	8			294	156	116		53	140
	GO:0009953~dorsal/ventral pattern formation	1.99336	1.85185			28.5714	14.2857							5.97765	5.63278							4.5348	83.5284							6	3			294	156	116		21
	GO:0010769~regulation of cell morphogenesis involved in differentiation	2.99003	3.08642	3.33333		18.3673	10.2041	8.16327		11.6883	6.49351	5.19481		3.84277	4.02342	4.32864		5.61198	5.87579	6.32154		3.49907	45.9224	67.5955		0.343271	16.5437	35.3667		9	5	4		294	156	116		49	77
	GO:0010770~positive regulation of cell morphogenesis involved in differentiation	1.99336	1.85185	2.5	2.66667	100	50	50	33.3333	85.7143	42.8571	42.8571	28.5714	20.9218	19.7147	26.5129	28.4769	41.1545	38.7802	52.1527	56.0159	0.00247093	14.5471	8.22292	69.1716	0.000136492	4.20318	2.30151	44.9067	6	3	3	2	294	156	116		6	7
	GO:0017145~stem cell division	0.996678	2.66667	1.66667	2.66667	75	75	50	50			22.2222	22.2222	15.6913	29.5721	26.5129	42.7153			27.0421	43.5679	20.6495	6.27835	72.9108	54.3589			72.0209	53.5374	3	3	2	2	294	156	116		4	9
	GO:0019827~stem cell maintenance	1.99336	1.85185	2.5	4	37.5	18.75	18.75	18.75	24	12	12	12	7.84566	7.39303	9.94235	16.0182	11.5233	10.8585	14.6028	23.5267	1.20378	66.5642	46.0521	21.4556	0.253652	42.1262	26.2725	11.1003	6	3	3	3	294	156	116		16	25
	GO:0021915~neural tube development	2.32558				19.4444								4.06812								11.031								7				294	156	116		36
	GO:0030154~cell differentiation	36.5449	43.8272	41.6667	48	15.3417	9.90237	6.9735	5.02092	6.71961	4.3372	3.05437	2.19914	3.20976	3.90445	3.69776	4.2894	3.22633	3.92461	3.71685	4.31155	1.68489e-28	3.42673e-23	2.87297e-14	5.9952e-12	1.68954e-27	8.84856e-23	4.1289e-14	7.12763e-12	110	71	50	36	294	156	116		717	1637
	GO:0030326~embryonic limb morphogenesis	2.99003	4.32099		4	21.4286	16.6667		7.14286	10.3448	8.04598		3.44828	4.48324	6.57158		6.10218	4.96692	7.28058		6.76054	1.23671	1.01267		77.3497	0.795642	0.680512		71.1679	9	7		3	294	156	116		42	87
	GO:0035113~embryonic appendage morphogenesis	2.99003	4.32099		4	21.4286	16.6667		7.14286	10.3448	8.04598		3.44828	4.48324	6.57158		6.10218	4.96692	7.28058		6.76054	1.23671	1.01267		77.3497	0.795642	0.680512		71.1679	9	7		3	294	156	116		42	87
	GO:0035116~embryonic hindlimb morphogenesis	0.996678			2.66667	37.5			25				11.1111	7.84566			21.3576				21.784	62.1209			79.1796				78.4229	3			2	294	156	116		8	18
	GO:0045165~cell fate commitment	8.30565	7.40741	8.33333	8	46.2963	22.2222	18.5185	11.1111	17.9856	8.63309	7.19424	4.31655	9.686	8.76211	9.8196	9.49228	8.63554	7.81184	8.75465	8.46283	4.85641e-15	0.000121357	0.000926306	0.610052	1.79856e-12	0.000647654	0.00337378	1.11854	25	12	10	6	294	156	116		54	139
	GO:0045168~cell-cell signaling involved in cell fate specification	1.66113	2.66667		2.66667	71.4286	42.8571		28.5714				10.5263	14.9441	16.8984		24.4087				20.6374	0.284047	19.4934		74.6646				80.1862	5	3		2	294	156	116		7	19
	GO:0045595~regulation of cell differentiation	21.5947	22.2222	25.8333	26.6667	26.749	14.8148	12.7572	8.23045	13.2114	7.31707	6.30081	4.06504	5.59636	5.84141	6.76462	7.03132	6.34326	6.62101	7.66744	7.96974	1.37633e-28	1.1865e-14	4.30089e-14	2.52074e-08	4.02412e-30	6.61264e-16	3.05434e-15	3.88528e-09	65	36	31	20	294	156	116		243	492
	GO:0045596~negative regulation of cell differentiation	8.9701	8.64198	10.8333	10.6667	24.1071	12.5	11.6071	7.14286	12.5	6.48148	6.01852	3.7037	5.04364	4.92869	6.15479	6.10218	6.0017	5.86491	7.32391	7.26132	1.27851e-08	0.00695752	0.00162628	0.471456	7.95186e-10	0.00131095	0.000324463	0.174321	27	14	13	8	294	156	116		112	216
	GO:0045597~positive regulation of cell differentiation	12.6246	12.963	15	17.3333	35.8491	19.8113	16.9811	12.2642	16.5939	9.17031	7.86026	5.67686	7.50026	7.8115	9.00439	10.4773	7.96732	8.29795	9.56513	11.1298	5.67626e-20	1.68299e-09	1.06508e-08	3.38563e-06	1.90253e-19	1.29815e-09	7.60739e-09	2.31609e-06	38	21	18	13	294	156	116		106	229
	GO:0045995~regulation of embryonic development	1.99336	3.08642	2.5	2.66667	85.7143	71.4286	42.8571	28.5714	46.1538	38.4615	23.0769	15.3846	17.9329	28.1639	22.7254	24.4087	22.1601	34.8028	28.0822	30.1624	0.00831065	0.0226253	11.1997	74.6646	0.00754814	0.0163614	8.04861	66.9569	6	5	3	2	294	156	116		7	13
	GO:0048332~mesoderm morphogenesis	2.32558	1.85185			30.4348				18.4211	7.89474			6.36749				8.84461	7.14372			1.01173				0.216267	69.5892			7	3			294	156	116		23	38
	GO:0048339~paraxial mesoderm development	0.996678				33.3333								6.97392								70.4158								3				294	156	116		9
	GO:0048340~paraxial mesoderm morphogenesis	0.996678				50								10.4609								42.1567								3				294	156	116		6
	GO:0048562~embryonic organ morphogenesis	2.65781				17.7778								3.71943								8.55726								8				294	156	116		45
	GO:0048568~embryonic organ development	4.31894		5		19.403		8.95522		7.55814		3.48837		4.05945		4.74858		3.62894		4.24499		0.111629		13.0383		0.453574		20.6324		13		6		294	156	116		67	172
	GO:0048598~embryonic morphogenesis	10.299	8.64198	6.66667		21.2329	9.58904	5.47945		10.0977	4.56026	2.60586		4.44229	3.78091	2.90553		4.84828	4.12645	3.17107		8.31928e-09	0.123919	28.377		2.90151e-09	0.0600343	19.9552		31	14	8		294	156	116		146	307
	GO:0048863~stem cell differentiation	1.99336	4	2.5	4	35.2941	17.6471	17.6471	17.6471			9.375	9.375	7.38415	6.95814	9.35751	15.076			11.4084	18.3802	1.63616	70.6559	49.9698	23.809			38.6312	17.3529	6	3	3	3	294	156	116		17	32
	GO:0048864~stem cell development	1.99336	4	2.5	4	35.2941	17.6471	17.6471	17.6471	23.0769	11.5385	11.5385	11.5385	7.38415	6.95814	9.35751	15.076	11.0801	10.4408	14.0411	22.6218	1.63616	70.6559	49.9698	23.809	0.308672	44.5108	28.0129	11.9346	6	3	3	3	294	156	116		17	26
	GO:0051093~negative regulation of developmental process	10.6312	9.25926	13.3333	12	24.4275	11.4504	12.2137	6.87023	12.3552	5.79151	6.17761	3.4749	5.11066	4.51483	6.47644	5.86927	5.93218	5.24057	7.51751	6.81274	6.07403e-11	0.00785292	2.56196e-05	0.198654	4.60743e-12	0.00176438	4.84141e-06	0.0762622	32	15	16	9	294	156	116		131	259
	GO:0051094~positive regulation of developmental process	14.9502	16.0494	17.5	18.6667	34.6154	20	16.1538	10.7692	16.1871	9.35252	7.55396	5.03597	7.24215	7.8859	8.56572	9.20021	7.77199	8.46283	9.19238	9.8733	1.29047e-23	1.17684e-12	2.71139e-10	3.17909e-06	3.05826e-23	5.88418e-13	1.46516e-10	1.79361e-06	45	26	21	14	294	156	116		130	278
	GO:0008543~fibroblast growth factor receptor signaling pathway	2.65781	4.93827	3.33333	5.33333	61.5385	61.5385	30.7692	30.7692	27.5862	27.5862	13.7931	13.7931	12.8749	24.2643	16.3156	26.2863	13.2451	24.962	16.7848	27.0421	0.00125453	1.50635e-05	2.7116	0.653161	0.00294266	3.78453e-05	2.81456	0.68276	8	8	4	4	294	156	116		13	29
	GO:0008593~regulation of Notch signaling pathway	1.3289		2.5	2.66667	50		37.5	25			27.2727	18.1818	10.4609		19.8847	21.3576			33.1881	35.6465	8.66978		14.497	79.1796			5.80081	60.817	4		3	2	294	156	116		8	11
	GO:0016055~Wnt receptor signaling pathway	5.64784	6.17284	3.33333		23.2877	13.6986			12.782	7.5188	3.00752		4.87219	5.4013			6.13708	6.80355	3.65984		0.000378639	0.140334			2.87483e-05	0.027747	82.0965		17	10	4		294	156	116		73	133
	GO:0017015~regulation of transforming growth factor beta receptor signaling pathway	2.32558	2.46914	2.5		30.4348	17.3913	13.0435		17.9487	10.2564	7.69231		6.36749	6.8573	6.91642		8.61783	9.28074	9.36074		1.01173	29.0182	70.3857		0.251137	14.5956	50.7187		7	4	3		294	156	116		23	39
	GO:0030509~BMP signaling pathway	3.32226	3.08642	4.16667		32.2581	16.129	16.129		22.7273	11.3636	11.3636		6.74896	6.35959	8.55256		10.9122	10.2826	13.8284		0.0160788	11.9658	4.18858		0.00042806	2.35798	0.760601		10	5	5		294	156	116		31	44
	GO:0030510~regulation of BMP signaling pathway	1.3289		2.5		25		18.75				10		5.23044		9.94235				12.169		50.1145		46.0521				35.0819		4		3		294	156	116		16	30
	GO:0030514~negative regulation of BMP signaling pathway	1.3289		2.5		30.7692		23.0769				14.2857		6.43747		12.2367				17.3842		32.3787		33.8709				19.5363		4		3		294	156	116		13	21
	GO:0030511~positive regulation of transforming growth factor beta receptor signaling pathway	0.996678	1.85185	1.66667	2.66667	42.8571	42.8571	50	50			28.5714	28.5714	8.96647	16.8984	26.5129	42.7153			34.7685	56.0159	52.607	19.4934	72.9108	54.3589			62.8644	44.9067	3	3	2	2	294	156	116		7	7
	GO:0030947~regulation of vascular endothelial growth factor receptor signaling pathway	1.3289	1.85185	1.66667	2.66667	66.6667	50		33.3333			22.2222	22.2222	13.9478	19.7147		28.4769			27.0421	43.5679	3.4137	14.5471		69.1716			72.0209	53.5374	4	3	2	2	294	156	116		6	9
	GO:0030949~positive regulation of vascular endothelial growth factor receptor signaling pathway	1.3289	1.85185			100	75							20.9218	29.5721							0.743024	6.27835							4	3			294	156	116		4
	GO:0032909~regulation of transforming growth factor-beta2 production	0.996678		1.66667		100		66.6667				50		20.9218		35.3506				60.8448		11.2219		62.4481				43.2204		3		2		294	156	116		3	4
	GO:0032925~regulation of activin receptor signaling pathway	0.996678		1.66667		42.8571						20		8.96647						24.3379		52.607						75.7144		3		2		294	156	116		7	10
	GO:0032927~positive regulation of activin receptor signaling pathway		1.23457				66.6667								26.2863								74.1694								2			294	156	116		3
	GO:0006928~cell motion	15.2824	25.3086	20	28	21.1009	18.8073	11.0092	9.63303	9.68421	8.63158	5.05263	4.42105	4.41469	7.41564	5.83771	8.22955	4.64974	7.81047	6.14853	8.66772	1.42859e-14	2.73941e-21	1.22509e-08	3.16447e-10	1.19364e-14	2.2135e-21	6.95528e-09	1.81277e-10	46	41	24	21	294	156	116		218	475
	GO:0008283~cell proliferation	10.6312	12.963	10	12	14.3498	9.41704	5.38117	4.03587	7.33945	4.81651	2.75229	2.06422	3.00223	3.71309	2.85341	3.44787	3.52393	4.35833	3.34926	4.04702	9.00955e-05	0.00110522	4.83879	6.40233	3.928e-06	0.000112249	1.46847	2.51068	32	21	12	9	294	156	116		223	436
	GO:0008284~positive regulation of cell proliferation	16.6113	23.4568	20	24	24.5098	18.6275	11.7647	8.82353	12.0773	9.17874	5.7971	4.34783	5.12788	7.34471	6.23834	7.53799	5.79874	8.30559	7.05447	8.52415	3.8463e-19	3.06616e-19	3.00727e-09	1.31881e-07	2.1819e-20	2.0485e-20	4.02101e-10	2.59743e-08	50	38	24	18	294	156	116		204	414
	GO:0008285~negative regulation of cell proliferation	11.2957	12.963	15.8333	17.3333	18.8889	11.6667	10.5556	7.22222	9.41828	5.81717	5.26316	3.60111	3.95189	4.60011	5.59717	6.16998	4.52206	5.2638	6.40472	7.06017	1.84675e-08	3.09738e-05	7.34458e-06	0.00131027	1.35464e-09	4.71281e-06	1.23123e-06	0.000362669	34	21	19	13	294	156	116		180	361
	GO:0042127~regulation of cell proliferation	27.5748	34.5679	34.1667	38.6667	21.0127	14.1772	10.3797	7.34177	10.5464	7.11563	5.20966	3.68488	4.39622	5.59	5.50395	6.27212	5.0637	6.43873	6.33961	7.22441	9.94351e-30	1.42229e-24	8.12348e-17	9.32587e-13	1.10708e-32	5.95385e-27	1.13138e-18	3.56464e-14	83	56	41	29	294	156	116		395	787
	GO:0051129~negative regulation of cellular component organization		4.93827	5.83333	5.33333	12.7907	9.30233	8.13953	4.65116			4.92958	2.8169	2.67604	3.66786	4.31606	3.97351			5.99879	5.52269	12.4892	9.64996	8.66861	73.9534			1.8315	44.8985	11	8	7	4	294	156	116		86	142
	GO:0051130~positive regulation of cellular component organization	7.6412	8.02469	6.66667	6.66667	23.4694	13.2653	8.16327	5.10204	12.7072	7.18232	4.41989	2.76243	4.91021	5.23044	4.32864	4.3587	6.10118	6.49908	5.37855	5.4159	1.13361e-06	0.0094758	3.84445	36.0387	4.42426e-08	0.00127743	1.19406	19.8838	23	13	8	5	294	156	116		98	181
	GO:0051270~regulation of cell motion	11.2957	17.284	18.3333	22.6667	32.0755	26.4151	20.7547	16.0377	17.6166	14.5078	11.399	8.80829	6.71076	10.4153	11.0054	13.7011	8.45836	13.1277	13.8714	17.2691	8.65446e-16	2.54695e-17	1.88738e-13	4.70513e-11	7.03186e-18	3.10875e-19	6.69045e-15	2.06501e-12	34	28	22	17	294	156	116		106	193
	GO:0051271~negative regulation of cell motion	2.32558	3.08642	5	5.33333	20.5882	14.7059	17.6471	11.7647	11.1111	7.93651	9.52381	6.34921	4.30742	5.79845	9.35751	10.0507	5.33485	7.18152	11.5895	12.448	8.36262	16.2604	0.651349	10.922	3.39949	8.54477	0.273963	6.38822	7	5	6	4	294	156	116		34	63
	GO:0051272~positive regulation of cell motion	7.97342	12.3457	12.5	16	44.4444	37.037	27.7778	22.2222	24.4898	20.4082	15.3061	12.2449	9.29856	14.6035	14.7294	18.9846	11.7584	18.4668	18.626	24.0068	8.1156e-14	2.03472e-14	8.56804e-10	2.37226e-08	5.12249e-15	1.34624e-15	8.04579e-11	3.1146e-09	24	20	15	12	294	156	116		54	98
KEGG	hsa04060:Cytokine-cytokine receptor interaction	9.96678	18.5185	15	24	44.1176	44.1176	26.4706	26.4706	11.4504	11.4504	6.87023	6.87023	4.61792	7.48663	7.05882	9.88235	2.7208	4.411	4.15894	5.82252	2.20268e-10	1.77694e-16	9.75504e-08	2.21556e-10	0.00116315	1.0037e-08	0.000782637	3.19564e-06	30	30	18	18	214	132	84	60	68	262	2240	5085
	hsa04510:Focal adhesion	9.63455	14.1975	10	14.6667	23.0159	18.254	9.52381	8.73016	14.4279	11.4428	5.97015	5.47264	2.40914	3.09764	2.53968	3.25926	3.4283	4.40807	3.61407	4.63806	0.00975741	0.00181503	6.1306	1.3985	1.30348e-05	5.80898e-06	0.405523	0.0917349	29	23	12	11	214	132	84		126	201
	hsa04512:ECM-receptor interaction	4.65116	8.64198	6.66667	10.6667	31.1111	31.1111	17.7778	17.7778	16.6667	16.6667	9.52381	9.52381	3.25649	5.27946	4.74074	6.63704	3.96028	6.42045	5.76531	8.07143	0.190963	0.000854053	1.17267	0.13582	0.0432975	0.000179991	0.429536	0.047481	14	14	8	8	214	132	84		45	84
	hsa04520:Adherens junction	6.31229	5.55556	5	5.33333	33.3333	15.7895	10.5263		24.6753	11.6883	7.79221	5.19481	3.4891	2.67943	2.80702		5.86327	4.50266	4.71707	4.4026	0.00245473	16.6623	47.6054		1.61018e-06	0.829902	8.50758	47.9738	19	9	6	4	214	132	84		57	77
	hsa04810:Regulation of actin cytoskeleton	6.31229	10.4938	6.66667	10.6667	16.5217	14.7826		6.95652			3.72093	3.72093	1.72938	2.50856		2.5971			2.25249	3.15349	21.5451	0.869826		27.046			49.3697	11.6368	19	17	8	8	214	132	84		115	215
	hsa04320:Dorso-ventral axis formation	1.99336		4.16667	4	42.8571		35.7143	21.4286			20	12	4.48598		9.52381	8			12.1071	10.17	7.97436		1.43717	42.6177			0.701629	30.4868	6		5	3	214	132	84		14	25
	hsa04010:MAPK signaling pathway	11.2957	14.8148	10.8333	14.6667	22.973	16.2162	8.78378	7.43243	12.7341	8.98876	4.86891	4.11985	2.40465	2.75184	2.34234	2.77477	3.02583	3.46272	2.94743	3.49157	0.00125896	0.00832538	7.54554	4.62052	1.23713e-05	0.00023912	1.27536	0.913784	34	24	13	11	214	132	84		148	267
	hsa04310:Wnt signaling pathway	9.30233	6.79012	5.83333		30.1075	11.828			18.543	7.28477	4.63576		3.15144	2.00717			4.40614	2.80629	2.80629		4.26848e-05	38.2003			7.87234e-08	5.76095	33.0267		28	11	7		214	132	84		93	151
	hsa04330:Notch signaling pathway	3.32226	3.08642			45.4545	22.7273			21.2766	10.6383			4.75786	3.85675			5.05568	4.09816			0.101476	33.7642			0.12987	30.6232			10	5			214	132	84		22	47
	hsa04350:TGF-beta signaling pathway	7.6412	5.55556	10	6.66667	37.7049	14.7541	19.6721	8.19672	26.4368	10.3448	13.7931	5.74713	3.94668	2.50373	5.2459	3.06011	6.28182	3.98511	8.34975	4.87069	1.03644e-05	23.5031	0.00937558	56.2452	3.89667e-09	1.84943	0.000125209	17.4658	23	9	12	5	214	132	84		61	87
	hsa04370:VEGF signaling pathway	3.65449	4.32099			24.4444	15.5556							2.55867	2.63973							8.67552	39.9569							11	7			214	132	84		45
	hsa04722:Neurotrophin signaling pathway	4.65116				18.9189								1.9803								20.3508								14				214	132	84		74
	hsa04110:Cell cycle	5.98007		5.83333		21.6867		8.43373		14.4		5.6		2.27001		2.249		3.42168		3.39		1.71819		61.7216		0.0162655		15.9968		18		7		214	132	84		83	125
	hsa05200:Pathways in cancer	24.2525	23.4568	25	26.6667	37.2449	19.3878	15.3061	10.2041	22.2561	11.5854	9.14634	6.09756	3.89853	3.29004	4.08163	3.80952	5.28842	4.463	5.5368	5.16768	1.18699e-25	1.51705e-08	9.57868e-09	0.000219178	3.86305e-32	3.37508e-12	7.90479e-12	2.00678e-06	73	38	30	20	214	132	84		196	328

## Sheet: I) Other
Term		%		% (human)	% (human)	% (hESC)	% (hESC)	Fold Enrichment (human)	Fold Enrichment (human)	Fold Enrichment (hESC)	Fold Enrichment (hESC)	FDR (human)	FDR (human)	FDR (hESC)	FDR (hESC)	Count	Count (human)	List Total	List Total (hESC)	Pop Hits (human)	Pop Hits (hESC)	Pop Total (human)	Pop Total (hESC)
		ALL_EC+TF	ALL_EC	ALL_EC+TF	ALL_EC	ALL_EC+TF	ALL_EC	ALL_EC+TF	ALL_EC	ALL_EC+TF	ALL_EC	ALL_EC+TF	ALL_EC	ALL_EC+TF	ALL_EC	ALL_EC+TF	ALL_EC	ALL_EC+TF	ALL_EC
GO	GO:0006350~transcription	50		10.942		5.47358		2.96493		3.40375		8.55551e-29		1.14244e-33		115		227	92	1051	2101	6151	14116
	GO:0010467~gene expression	54.3478		7.99233		4.16806		2.16567		2.59191		8.9581e-19		1.01835e-25		125				1564	2999	6151	14116
	GO:0010468~regulation of gene expression	61.7391		10.0709		4.97199		2.72891		3.09183		3.19178e-35		8.03394e-41		142				1410	2856	6151
	GO:0010628~positive regulation of gene expression	28.2609		23.2975		11.1876		6.3129		6.95702		5.08565e-32		4.78248e-33		65			92	279	581	6151	14116
	GO:0010629~negative regulation of gene expression	15.2174		12.6812		6.94444		3.4362		4.3184		4.58499e-07		1.73999e-09		35				276	504	6151
	GO:0016481~negative regulation of transcription	14.7826		13.9344		7.40741		3.7758		4.6063		6.93821e-08		6.68043e-10		34			92	244	459	6151	14116
	GO:0045449~regulation of transcription	58.6957		10.7058		5.19031		2.90094		3.2276		1.51059e-35		7.12936e-40		135			92	1261	2601	6151	14116
	GO:0045941~positive regulation of transcription	28.2609		23.7226		11.5248		6.4281		7.16671		1.57233e-32		7.83421e-34		65				274	564	6151
	GO:0003001~generation of a signal involved in cell-cell signaling	2.6087	4.21053	22.2222	14.8148			6.02154	9.90499			4.62366	11.5185			6	4		92	27		6151	14116
	GO:0007044~cell-substrate junction assembly	1.30435	3.15789		20	13.0435	13.0435		13.3717	8.11109	20.0132		29.4339	61.0499	15.1801	3	3			15	23	6151	14116
	GO:0007154~cell communication	12.1739	18.9474	9.68858	6.22837	3.52201	2.26415	2.62531	4.16421	2.19016	3.474	0.0104564	0.00139785	0.316264	0.0188248	28	18			289	795	6151	14116
	GO:0007155~cell adhesion	7.82609	14.7368	5.96026	4.63576	2.57143	2	1.61505	3.09941	1.59904	3.0687	61.4786	0.767971	65.0213	0.903035	18	14		92	302	700	6151
	GO:0007267~cell-cell signaling	7.82609	11.5789	8.867	5.41872	3	1.83333	2.40268	3.62288	1.86555	2.81297	2.08372	1.31085	25.4237	8.56596	18	11			203	600	6151	14116
	GO:0010646~regulation of cell communication	21.3043	32.6316	9.38697	5.9387	4.72062	2.98651	2.54358	3.97054	2.93552	4.58235	2.09223e-06	4.09083e-08	2.64885e-08	1.45028e-09	49	31		92	522	1038	6151	14116
	GO:0010647~positive regulation of cell communication	11.3043	20	16.0494	11.7284	7.90274	5.77508	4.34889	7.84145	4.91432	8.86098	1.19819e-06	2.23781e-08	1.84217e-07	4.50902e-09	26	19		92	162	329		14116
	GO:0010648~negative regulation of cell communication	6.08696	7.36842	10.9375	5.46875	5.64516	2.82258	2.96373	3.65633	3.51044	4.33082	1.38238	17.8784	0.324157	8.77078	14	7		92	128	248	6151	14116
	GO:0022610~biological adhesion	7.82609	14.7368	5.96026	4.63576	2.56776	1.99715	1.61505	3.09941	1.59676	3.06432	61.4786	0.767971	65.4234	0.915218	18	14		92	302	701	6151	14116
	GO:0030036~actin cytoskeleton organization		7.36842		5.55556				3.71437				16.7255				7		92	126		6151	14116
	GO:0030155~regulation of cell adhesion	3.04348	6.31579	10.9375	9.375	5.10949	4.37956	2.96373	6.268	3.17734	6.71977	40.953	4.10558	33.693	3.23354	7	6		92	64	137	6151	14116
	GO:0030198~extracellular matrix organization	3.04348		12.963		6.73077		3.51256		4.18553		21.5951		10.9239		7				54	104	6151
	GO:0034329~cell junction assembly		3.15789		13.0435				8.7207				54.5424				3		92	23		6151	14116
	GO:0034330~cell junction organization		3.15789		9.09091		5.26316		6.07806		8.07551		78.3409		60.2413		3		92	33	57	6151	14116
	GO:0043062~extracellular structure organization	3.91304	4.21053	10.9756		5.52147	2.45399	2.97405		3.43353	3.76527	16.4302		8.09444	79.5851	9	4		92	82	163	6151	14116
	GO:0000904~cell morphogenesis involved in differentiation	5.65217	8.42105	11.5044	7.07965	5.32787	3.27869	3.11734	4.73336	3.31314	5.03065	1.47395	2.26568	1.01347	1.703	13	8		92	113	244	6151	14116
	GO:0001701~in utero embryonic development	6.52174		15.625		8.52273		4.23389		5.29986		0.0159017		0.00161074		15			92	96	176	6151	14116
	GO:0001702~gastrulation with mouth forming second	1.30435		30				8.12907				59.5675				3			92	10		6151	14116
	GO:0001704~formation of primary germ layer	3.04348	3.15789	29.1667	12.5	17.5	7.5	7.90327	8.35734	10.8824	11.5076	0.314439	57.4105	0.0680078	37.9534	7	3		92	24	40	6151	14116
	GO:0001706~endoderm formation	0.869565		100				27.0969				73.4845				2			92	2		6151	14116
	GO:0001707~mesoderm formation	2.6087	3.15789	26.087	13.0435	16.6667	8.33333	7.06876	8.7207	10.3642	12.7862	2.19811	54.5424	0.447766	32.3592	6	3		92	23	36	6151	14116
	GO:0001708~cell fate specification	3.04348	4.21053	43.75	25	13.7255	7.84314	11.8549	16.7147	8.5352	12.0341	0.0239939	2.59325	0.2753	7.17246	7	4		92	16	51	6151	14116
	GO:0001709~cell fate determination	1.30435		23.0769				6.25313				77.3448				3			92	13		6151
	GO:0001756~somitogenesis	3.04348	4.21053	41.1765	23.5294	20.5882	11.7647	11.1576	15.7315	12.8028	18.0512	0.0359476	3.10769	0.0258225	2.28418	7	4			17	34	6151	14116
	GO:0001824~blastocyst development	2.6087		20		13.9535		5.41938		8.67698		7.36198		1.04103		6				30	43	6151	14116
	GO:0001892~embryonic placenta development	1.73913		25		16.6667		6.77423		10.3642		29.13		10.7503		4				16	24	6151	14116
	GO:0007275~multicellular organismal development	45.6522	58.9474	8.37321	4.46571	3.66492	1.95462	2.26888	2.98572	2.27903	2.99907	1.09027e-15	7.15931e-14	2.11683e-15	8.48767e-14	105	56			1254	2865	6151	14116
	GO:0007368~determination of left/right symmetry	1.73913		17.3913				4.71251				60.0494				4			92	23		6151	14116
	GO:0007369~gastrulation	4.78261	4.21053	26.1905	9.52381	15.7143	5.71429	7.09681	6.36749	9.77193	8.7677	0.00341098	33.8519	0.000275508	16.4528	11	4		92	42	70	6151	14116
	GO:0007398~ectoderm development	4.78261	6.31579	18.9655	10.3448	5.52764	3.01508	5.13907	6.91642	3.43736	4.62617	0.0721268	2.66342	2.44033	14.791	11	6		92	58	199	6151	14116
	GO:0007498~mesoderm development	3.47826	4.21053	20.5128	10.2564	10.8108	5.40541	5.55834	6.8573	6.72271	8.29377	0.818997	28.7401	0.314927	18.8743	8	4			39	74	6151	14116
	GO:0009790~embryonic development	18.2609	16.8421	15	5.71429	7.39437	2.8169	4.06454	3.8205	4.59819	4.32211	1.2601e-11	0.0212432	3.88578e-13	0.00543128	42	16			280	568	6151	14116
	GO:0009792~embryonic development ending in birth or egg hatching	10.8696	7.36842	15.3374	4.29448	7.48503	2.09581	4.15597	2.87123	4.65457	3.2157	7.1417e-06	43.9888	1.39568e-06	30.401	25	7		92	163	334	6151	14116
	GO:0009952~anterior/posterior pattern formation	6.95652	7.36842	30.1887	13.2075	11.4286	5	8.1802	8.83039	7.10686	7.67174	6.05701e-07	0.200434	1.20838e-05	0.4899	16	7			53	140	6151	14116
	GO:0009953~dorsal/ventral pattern formation	2.17391	3.15789	23.8095	14.2857			6.45165	9.55124			10.8991	48.5493			5	3			21		6151	14116
	GO:0010769~regulation of cell morphogenesis involved in differentiation	2.6087	3.15789	12.2449		7.79221	3.8961	3.31799		4.84559	5.97798	44.7011		12.9861	79.5787	6	3			49	77		14116
	GO:0010770~positive regulation of cell morphogenesis involved in differentiation	1.30435		50		42.8571		13.5485		26.6507		27.9015		8.63774		3				6	7	6151
	GO:0019827~stem cell maintenance	1.30435				12				7.4622				66.7127		3			92		25	6151	14116
	GO:0021915~neural tube development	2.17391		13.8889				3.76346				52.982				5			92	36
	GO:0030154~cell differentiation	30.8696	41.0526	9.90237	5.43933	4.3372	2.38241	2.68324	3.63667	2.69709	3.65544	2.95319e-12	3.32578e-10	5.70655e-12	3.95994e-10	71	39		92	717	1637	6151	14116
	GO:0030326~embryonic limb morphogenesis	3.47826	4.21053	19.0476	9.52381	9.1954	4.5977	5.16132	6.36749	5.71816	7.05447	1.305	33.8519	0.85584	27.6228	8	4		92	42	87	6151	14116
	GO:0035113~embryonic appendage morphogenesis	3.47826	4.21053	19.0476	9.52381	9.1954	4.5977	5.16132	6.36749	5.71816	7.05447	1.305	33.8519	0.85584	27.6228	8	4			42	87	6151	14116
	GO:0035116~embryonic hindlimb morphogenesis	1.30435		37.5				10.1613				44.3448				3			92	8		6151	14116
	GO:0045165~cell fate commitment	7.3913	7.36842	31.4815	12.963	12.2302	5.03597	8.53051	8.66687	7.60536	7.72693	7.03283e-08	0.222807	1.28778e-06	0.471361	17	7		92	54	139	6151	14116
	GO:0045168~cell-cell signaling involved in cell fate specification	1.30435		42.8571				11.613				36.1435				3			92	7
	GO:0045595~regulation of cell differentiation	17.3913	21.0526	16.4609	8.23045	8.13008	4.06504	4.4604	5.50277	5.05569	6.23719	2.75335e-12	2.64752e-06	1.9984e-13	4.34121e-07	40	20		92	243	492
	GO:0045596~negative regulation of cell differentiation	7.3913	9.47368	15.1786	8.03571	7.87037	4.16667	4.11292	5.37257	4.89419	6.39312	0.00473584	0.390949	0.000695567	0.129814	17	9		92	112	216
	GO:0045597~positive regulation of cell differentiation	9.56522	10.5263	20.7547	9.43396	9.60699	4.36681	5.62389	6.30742	5.97411	6.70021	2.59992e-07	0.0396595	1.9986e-07	0.028272	22	10		92	106	229	6151	14116
	GO:0045995~regulation of embryonic development	1.30435	3.15789	42.8571	42.8571	23.0769	23.0769	11.613	28.6537	14.3504	35.408	36.1435	7.19751	27.1674	5.13872	3	3			7	13	6151
	GO:0048332~mesoderm morphogenesis	2.6087	3.15789	26.087	13.0435	15.7895	7.89474	7.06876	8.7207	9.81869	12.1133	2.19811	54.5424	0.580509	35.1563	6	3		92	23	38	6151	14116
	GO:0048562~embryonic organ morphogenesis	2.17391		11.1111				3.01077				78.0397				5				45		6151	14116
	GO:0048568~embryonic organ development	3.47826		11.9403		4.65116		3.23545		2.89233		17.8036		31.1638		8			92	67	172	6151	14116
	GO:0048598~embryonic morphogenesis	11.3043	11.5789	17.8082	7.53425	8.46906	3.58306	4.82548	5.0373	5.26648	5.49766	1.19221e-07	0.0890355	4.15406e-08	0.0476562	26	11			146	307	6151
	GO:0048864~stem cell development					11.5385				7.17519				69.3378		3					26	6151	14116
	GO:0051093~negative regulation of developmental process	8.26087	9.47368	14.5038	6.87023	7.33591	3.4749	3.93009	4.59335	4.56184	5.33171	0.00197901	1.12743	0.000334247	0.452173	19	9		92	131	259	6151	14116
	GO:0051094~positive regulation of developmental process	11.3043	14.7368	20	10.7692	9.35252	5.03597	5.41938	7.20017	5.81587	7.72693	8.25174e-09	7.46941e-05	4.68202e-09	4.24442e-05	26	14		92	130	278	6151	14116
	GO:0008543~fibroblast growth factor receptor signaling pathway	1.73913	4.21053	30.7692	30.7692	13.7931	13.7931	8.33751	20.5719	8.57724	21.1634	17.2939	1.3757	17.6414	1.43344	4	4		92	13	29	6151	14116
	GO:0016055~Wnt receptor signaling pathway	5.65217	7.36842	17.8082	9.58904	9.77444	5.26316	4.82548	6.41111	6.07824	8.07551	0.0202302	1.1675	0.0026198	0.371365	13	7			73	133	6151	14116
	GO:0017015~regulation of transforming growth factor beta receptor signaling pathway	1.73913		17.3913		10.2564		4.71251		6.37795		60.0494		35.2763		4			92	23	39	6151	14116
	GO:0030509~BMP signaling pathway	2.17391	3.15789	16.129	9.67742	11.3636	6.81818	4.37047	6.4702	7.06648	10.4615	36.9005	74.4948	8.92732	43.4993	5	3		92	31	44	6151	14116
	GO:0030511~positive regulation of transforming growth factor beta receptor signaling pathway		2.10526		28.5714				19.1025				83.4051				2			7		6151
	GO:0006928~cell motion	10	22.1053	10.5505	9.63303	4.84211	4.42105	2.85885	6.44052	3.01106	6.78343	0.0241542	4.99147e-08	0.0143062	2.86915e-08	23	21			218	475	6151	14116
	GO:0008283~cell proliferation	10.8696	15.7895	11.2108	6.72646	5.73394	3.44037	3.03777	4.49722	3.56565	5.27872	0.00305921	0.00693659	0.000245578	0.00122407	25	15		92	223	436	6151	14116
	GO:0008284~positive regulation of cell proliferation	13.0435	22.1053	14.7059	10.2941	7.24638	5.07246	3.98484	6.88251	4.50616	7.78292	3.55023e-07	1.45584e-08	3.87015e-08	2.3334e-09	30	21			204	414		14116
	GO:0008285~negative regulation of cell proliferation	7.82609	9.47368	10	5	4.98615	2.49307	2.70969	3.34293	3.10064	3.82524	0.532639	8.15796	0.128233	3.8382	18	9		92	180	361	6151	14116
	GO:0042127~regulation of cell proliferation	21.3043	30.5263	12.4051	7.34177	6.22618	3.68488	3.36139	4.90861	3.87175	5.65389	7.65721e-11	1.46403e-09	7.88258e-13	6.60916e-11	49	29		92	395	787	6151	14116
	GO:0051130~positive regulation of cellular component organization	7.3913	8.42105	17.3469	8.16327	9.39227	4.41989	4.70049	5.45785	5.84058	6.78165	0.000746522	0.976871	6.02212e-05	0.285018	17	8		92	98	181	6151	14116
	GO:0051270~regulation of cell motion	6.08696	13.6842	13.2075	12.2642	7.25389	6.73575	3.57884	8.19965	4.51083	10.335	0.213699	6.3879e-05	0.0246269	6.40614e-06	14	13		92	106	193	6151	14116
	GO:0051272~positive regulation of cell motion	4.34783	9.47368	18.5185	16.6667	10.2041	9.18367	5.01795	11.1431	6.34541	14.0909	0.231406	0.00172533	0.0477928	0.000367905	10	9		92	54	98	6151	14116
KEGG	hsa03022:Basal transcription factors	5.65217		65		37.1429		9.39355		12.1853		6.48246e-07		2.00598e-07		13		155	78	20	35	2240	5085
	hsa04060:Cytokine-cytokine receptor interaction	5.65217	13.6842	19.1176	19.1176	4.96183	4.96183	2.76281	5.4902	1.6278	3.23473	2.02752	0.00197437	68.9039	0.550849	13	13		78	68	262	2240	5085
	hsa04510:Focal adhesion	7.82609	13.6842	14.2857	10.3175	8.95522	6.46766	2.06452	2.96296	2.93789	4.21642	5.05262	1.0472	0.116063	0.0444867	18	13		78	126	201	2240	5085
	hsa04512:ECM-receptor interaction	3.47826	8.42105	17.7778	17.7778	9.52381	9.52381	2.56918	5.10541	3.12442	6.20879	30.2323	0.75696	13.8709	0.273892	8	8			45	84	2240	5085
	hsa04520:Adherens junction	5.65217	5.26316	22.807		16.8831	6.49351	3.29598		5.53875	4.23327	0.385799		0.00294085	27.5915	13			78	57	77	2240	5085
	hsa04810:Regulation of actin cytoskeleton		9.47368		7.82609				2.24749				37.16				9		78	115		2240	5085
	hsa04010:MAPK signaling pathway	9.13043	13.6842	14.1892	8.78378	7.86517	4.86891	2.05057	2.52252	2.58028	3.17416	2.3009	4.1776	0.152723	0.653159	21	13			148	267	2240	5085
	hsa04310:Wnt signaling pathway	9.56522	7.36842	23.6559	7.52688	14.5695	4.63576	3.41866	2.16157	4.77975	3.02216	0.000578728	67.8572	3.3694e-06	25.4537	22	7		78	93	151	2240
	hsa04330:Notch signaling pathway	4.34783	4.21053	45.4545	18.1818	21.2766	8.51064	6.56891	5.22145	6.9801	5.54828	0.00706225	34.6935	0.00975162	31.6342	10	4		78	22	47	2240	5085
	hsa04350:TGF-beta signaling pathway	4.78261		18.0328		12.6437		2.60603		4.14794		8.14141		0.294752		11			78	61	87	2240	5085
	hsa04370:VEGF signaling pathway	3.91304	5.26316	20	11.1111			2.89032	3.19088			10.8054	53.3995			9	5			45		2240	5085
	hsa04722:Neurotrophin signaling pathway	4.78261		14.8649				2.14821				27.069				11			78	74
	hsa04110:Cell cycle	6.08696		16.8675		11.2		2.43762		3.67432		3.96869		0.100067		14				83	125	2240
	hsa05200:Pathways in cancer	20.4348	20	23.9796	9.69388	14.3293	5.79268	3.46544	2.78388	4.70092	3.77638	2.5091e-12	0.0731303	6.91824e-17	0.00128633	47	19		78	196	328	2240	5085
